# Supplementary material for: ADAMTS8 Promotes Cardiac Fibrosis Partly Through Activating EGFR Dependent Pathway
Source: Frontiers journal article supplement (doi:10.3389/fcvm.2022.797137), 2022-02-10
Supplement: Table_1.XLS [file Table_1.XLS]

## Sheet: Sample Setup
Block Type	96-Well 0.2-mL Block
Calibration Background is expired	No
Calibration Background performed on	09-10-2018
Calibration Pure Dye ABY is expired	No
Calibration Pure Dye ABY performed on	09-10-2018
Calibration Pure Dye FAM is expired	No
Calibration Pure Dye FAM performed on	09-10-2018
Calibration Pure Dye JUN is expired	No
Calibration Pure Dye JUN performed on	09-10-2018
Calibration Pure Dye NED is expired	No
Calibration Pure Dye NED performed on	09-10-2018
Calibration Pure Dye ROX is expired	No
Calibration Pure Dye ROX performed on	09-10-2018
Calibration Pure Dye SYBR is expired	No
Calibration Pure Dye SYBR performed on	09-10-2018
Calibration Pure Dye TAMRA is expired	No
Calibration Pure Dye TAMRA performed on	09-10-2018
Calibration Pure Dye VIC is expired	No
Calibration Pure Dye VIC performed on	09-10-2018
Calibration ROI is expired	No
Calibration ROI performed on	09-10-2018
Calibration Uniformity is expired	No
Calibration Uniformity performed on	09-10-2018
Chemistry	SYBR_GREEN
Date Created	2021-10-21 14:55:04 PM CST
Experiment Barcode
Experiment Comment
Experiment File Name	E:\zyf\1AAA 实验相关\实验相关\实验数据\qPCR\2019-12-15_zyf 验证小干扰.eds
Experiment Name	2019-12-15_zyf
Experiment Run End Time	2019-12-15 13:10:59 PM CST
Experiment Type	Comparative Cт (ΔΔCт)
Instrument Name	272322851
Instrument Serial Number	272322851
Instrument Type	QuantStudio™ 3 System
Passive Reference	ROX
Post-read Stage/Step
Pre-read Stage/Step
Quantification Cycle Method	Ct
Signal Smoothing On	true
Stage where Melt Analysis is performed	Stage3
Stage/ Cycle where Ct Analysis is performed	Stage2, Step2
User Name
Well	Well Position	Sample Name	Sample Color	Biogroup Name	Biogroup Color	Target Name	Target Color	Task	Reporter	Quencher	Quantity	Comments
1	A1	SCR	RGB(176,23,31)			gapdh	RGB(176,23,31)	UNKNOWN	SYBR	None
2	A2	SCR	RGB(176,23,31)			gapdh	RGB(176,23,31)	UNKNOWN	SYBR	None
3	A3	SCR	RGB(176,23,31)			gapdh	RGB(176,23,31)	UNKNOWN	SYBR	None
4	A4	SCR	RGB(176,23,31)			adam8	RGB(0,0,255)	UNKNOWN	SYBR	None
5	A5	SCR	RGB(176,23,31)			adam8	RGB(0,0,255)	UNKNOWN	SYBR	None
6	A6	SCR	RGB(176,23,31)			adam8	RGB(0,0,255)	UNKNOWN	SYBR	None
7	A7
8	A8
9	A9
10	A10
11	A11
12	A12
13	B1
14	B2
15	B3
16	B4
17	B5
18	B6
19	B7
20	B8
21	B9
22	B10
23	B11
24	B12
25	C1	si1	RGB(0,0,255)			gapdh	RGB(176,23,31)	UNKNOWN	SYBR	None
26	C2	si1	RGB(0,0,255)			gapdh	RGB(176,23,31)	UNKNOWN	SYBR	None
27	C3	si1	RGB(0,0,255)			gapdh	RGB(176,23,31)	UNKNOWN	SYBR	None
28	C4	si1	RGB(0,0,255)			adam8	RGB(0,0,255)	UNKNOWN	SYBR	None
29	C5	si1	RGB(0,0,255)			adam8	RGB(0,0,255)	UNKNOWN	SYBR	None
30	C6	si1	RGB(0,0,255)			adam8	RGB(0,0,255)	UNKNOWN	SYBR	None
31	C7
32	C8
33	C9
34	C10
35	C11
36	C12
37	D1
38	D2
39	D3
40	D4
41	D5
42	D6
43	D7
44	D8
45	D9
46	D10
47	D11
48	D12
49	E1	si2	RGB(0,139,69)			gapdh	RGB(176,23,31)	UNKNOWN	SYBR	None
50	E2	si2	RGB(0,139,69)			gapdh	RGB(176,23,31)	UNKNOWN	SYBR	None
51	E3	si2	RGB(0,139,69)			gapdh	RGB(176,23,31)	UNKNOWN	SYBR	None
52	E4	si2	RGB(0,139,69)			adam8	RGB(0,0,255)	UNKNOWN	SYBR	None
53	E5	si2	RGB(0,139,69)			adam8	RGB(0,0,255)	UNKNOWN	SYBR	None
54	E6	si2	RGB(0,139,69)			adam8	RGB(0,0,255)	UNKNOWN	SYBR	None
55	E7
56	E8
57	E9
58	E10
59	E11
60	E12
61	F1
62	F2
63	F3
64	F4
65	F5
66	F6
67	F7
68	F8
69	F9
70	F10
71	F11
72	F12
73	G1	si3	RGB(255,127,0)			gapdh	RGB(176,23,31)	UNKNOWN	SYBR	None
74	G2	si3	RGB(255,127,0)			gapdh	RGB(176,23,31)	UNKNOWN	SYBR	None
75	G3	si3	RGB(255,127,0)			gapdh	RGB(176,23,31)	UNKNOWN	SYBR	None
76	G4	si3	RGB(255,127,0)			adam8	RGB(0,0,255)	UNKNOWN	SYBR	None
77	G5	si3	RGB(255,127,0)			adam8	RGB(0,0,255)	UNKNOWN	SYBR	None
78	G6	si3	RGB(255,127,0)			adam8	RGB(0,0,255)	UNKNOWN	SYBR	None
79	G7
80	G8
81	G9
82	G10
83	G11
84	G12
85	H1
86	H2
87	H3
88	H4
89	H5
90	H6
91	H7
92	H8
93	H9
94	H10
95	H11
96	H12

## Sheet: Amplification Data
Block Type	96-Well 0.2-mL Block
Calibration Background is expired	No
Calibration Background performed on	09-10-2018
Calibration Pure Dye ABY is expired	No
Calibration Pure Dye ABY performed on	09-10-2018
Calibration Pure Dye FAM is expired	No
Calibration Pure Dye FAM performed on	09-10-2018
Calibration Pure Dye JUN is expired	No
Calibration Pure Dye JUN performed on	09-10-2018
Calibration Pure Dye NED is expired	No
Calibration Pure Dye NED performed on	09-10-2018
Calibration Pure Dye ROX is expired	No
Calibration Pure Dye ROX performed on	09-10-2018
Calibration Pure Dye SYBR is expired	No
Calibration Pure Dye SYBR performed on	09-10-2018
Calibration Pure Dye TAMRA is expired	No
Calibration Pure Dye TAMRA performed on	09-10-2018
Calibration Pure Dye VIC is expired	No
Calibration Pure Dye VIC performed on	09-10-2018
Calibration ROI is expired	No
Calibration ROI performed on	09-10-2018
Calibration Uniformity is expired	No
Calibration Uniformity performed on	09-10-2018
Chemistry	SYBR_GREEN
Date Created	2021-10-21 14:55:04 PM CST
Experiment Barcode
Experiment Comment
Experiment File Name	E:\zyf\1AAA 实验相关\实验相关\实验数据\qPCR\2019-12-15_zyf 验证小干扰.eds
Experiment Name	2019-12-15_zyf
Experiment Run End Time	2019-12-15 13:10:59 PM CST
Experiment Type	Comparative Cт (ΔΔCт)
Instrument Name	272322851
Instrument Serial Number	272322851
Instrument Type	QuantStudio™ 3 System
Passive Reference	ROX
Post-read Stage/Step
Pre-read Stage/Step
Quantification Cycle Method	Ct
Signal Smoothing On	true
Stage where Melt Analysis is performed	Stage3
Stage/ Cycle where Ct Analysis is performed	Stage2, Step2
User Name
Well	Well Position	Cycle	Target Name	Rn	Delta Rn
1	A1	1	gapdh	0.110656	-0.00194852
1	A1	2	gapdh	0.112758	-0.00269753
1	A1	3	gapdh	0.119646	0.00133789
1	A1	4	gapdh	0.121973	0.00081359
1	A1	5	gapdh	0.123271	-0.000740161
1	A1	6	gapdh	0.126001	-0.000862083
1	A1	7	gapdh	0.129263	-0.000451973
1	A1	8	gapdh	0.132711	0.000144148
1	A1	9	gapdh	0.133954	-0.00146513
1	A1	10	gapdh	0.137235	-0.00103634
1	A1	11	gapdh	0.141078	-4.47396e-05
1	A1	12	gapdh	0.14628	0.0023048
1	A1	13	gapdh	0.152591	0.00576433
1	A1	14	gapdh	0.165789	0.0161104
1	A1	15	gapdh	0.189756	0.0372257
1	A1	16	gapdh	0.233163	0.0777807
1	A1	17	gapdh	0.315426	0.157192
1	A1	18	gapdh	0.453612	0.292526
1	A1	19	gapdh	0.661101	0.497163
1	A1	20	gapdh	0.934261	0.767471
1	A1	21	gapdh	1.22231	1.05267
1	A1	22	gapdh	1.46764	1.29514
1	A1	23	gapdh	1.63529	1.45995
1	A1	24	gapdh	1.7383	1.5601
1	A1	25	gapdh	1.79309	1.61204
1	A1	26	gapdh	1.81633	1.63243
1	A1	27	gapdh	1.81706	1.63031
1	A1	28	gapdh	1.81116	1.62155
1	A1	29	gapdh	1.80615	1.61369
1	A1	30	gapdh	1.80278	1.60747
1	A1	31	gapdh	1.80037	1.60221
1	A1	32	gapdh	1.80033	1.59932
1	A1	33	gapdh	1.80349	1.59962
1	A1	34	gapdh	1.8167	1.60999
1	A1	35	gapdh	1.82827	1.6187
1	A1	36	gapdh	1.84672	1.6343
1	A1	37	gapdh	1.86672	1.65145
1	A1	38	gapdh	1.88819	1.67007
1	A1	39	gapdh	1.91096	1.68998
1	A1	40	gapdh	1.92641	1.70258
2	A2	1	gapdh	0.100629	-0.0108746
2	A2	2	gapdh	0.103896	-0.0111927
2	A2	3	gapdh	0.112744	-0.005929
2	A2	4	gapdh	0.122765	0.000506986
2	A2	5	gapdh	0.129416	0.00357391
2	A2	6	gapdh	0.131746	0.00231922
2	A2	7	gapdh	0.13485	0.00183867
2	A2	8	gapdh	0.137386	0.000789758
2	A2	9	gapdh	0.14071	0.000528479
2	A2	10	gapdh	0.142922	-0.00084325
2	A2	11	gapdh	0.145472	-0.00187885
2	A2	12	gapdh	0.150029	-0.000905913
2	A2	13	gapdh	0.158635	0.00411506
2	A2	14	gapdh	0.171781	0.0136766
2	A2	15	gapdh	0.194158	0.0324688
2	A2	16	gapdh	0.238116	0.0728427
2	A2	17	gapdh	0.315484	0.146626
2	A2	18	gapdh	0.449187	0.276744
2	A2	19	gapdh	0.658524	0.482497
2	A2	20	gapdh	0.938144	0.758531
2	A2	21	gapdh	1.23412	1.05092
2	A2	22	gapdh	1.48552	1.29874
2	A2	23	gapdh	1.66168	1.47131
2	A2	24	gapdh	1.77116	1.57721
2	A2	25	gapdh	1.83086	1.63332
2	A2	26	gapdh	1.85681	1.65569
2	A2	27	gapdh	1.86109	1.65638
2	A2	28	gapdh	1.85498	1.64669
2	A2	29	gapdh	1.84838	1.6365
2	A2	30	gapdh	1.84473	1.62927
2	A2	31	gapdh	1.84341	1.62437
2	A2	32	gapdh	1.84615	1.62352
2	A2	33	gapdh	1.84952	1.62331
2	A2	34	gapdh	1.85658	1.62679
2	A2	35	gapdh	1.87011	1.63673
2	A2	36	gapdh	1.88817	1.6512
2	A2	37	gapdh	1.90927	1.66872
2	A2	38	gapdh	1.93157	1.68743
2	A2	39	gapdh	1.95197	1.70425
2	A2	40	gapdh	1.96749	1.71618
3	A3	1	gapdh	0.10984	-0.00664506
3	A3	2	gapdh	0.114293	-0.00500889
3	A3	3	gapdh	0.120872	-0.00124622
3	A3	4	gapdh	0.125431	0.000495235
3	A3	5	gapdh	0.128826	0.00107413
3	A3	6	gapdh	0.130912	0.000343561
3	A3	7	gapdh	0.133084	-0.000301537
3	A3	8	gapdh	0.136398	0.000195911
3	A3	9	gapdh	0.13936	0.000340709
3	A3	10	gapdh	0.140944	-0.000891495
3	A3	11	gapdh	0.143811	-0.000841275
3	A3	12	gapdh	0.1483	0.00083098
3	A3	13	gapdh	0.155012	0.00472607
3	A3	14	gapdh	0.166023	0.0129196
3	A3	15	gapdh	0.190539	0.0346195
3	A3	16	gapdh	0.232317	0.0735804
3	A3	17	gapdh	0.308773	0.14722
3	A3	18	gapdh	0.440686	0.276315
3	A3	19	gapdh	0.647262	0.480075
3	A3	20	gapdh	0.925248	0.755244
3	A3	21	gapdh	1.22868	1.05586
3	A3	22	gapdh	1.49008	1.31444
3	A3	23	gapdh	1.67342	1.49496
3	A3	24	gapdh	1.78829	1.60702
3	A3	25	gapdh	1.85067	1.66658
3	A3	26	gapdh	1.87897	1.69207
3	A3	27	gapdh	1.88569	1.69597
3	A3	28	gapdh	1.87875	1.68622
3	A3	29	gapdh	1.87009	1.67474
3	A3	30	gapdh	1.8655	1.66733
3	A3	31	gapdh	1.86502	1.66403
3	A3	32	gapdh	1.866	1.66219
3	A3	33	gapdh	1.87037	1.66375
3	A3	34	gapdh	1.87799	1.66855
3	A3	35	gapdh	1.88921	1.67696
3	A3	36	gapdh	1.90742	1.69234
3	A3	37	gapdh	1.92818	1.71029
3	A3	38	gapdh	1.9513	1.7306
3	A3	39	gapdh	1.97405	1.75053
3	A3	40	gapdh	1.98881	1.76247
4	A4	1	adam8	0.0944952	0.00708907
4	A4	2	adam8	0.0970697	0.00510903
4	A4	3	adam8	0.100766	0.00425095
4	A4	4	adam8	0.103243	0.00217309
4	A4	5	adam8	0.106062	0.000437677
4	A4	6	adam8	0.110145	-3.35819e-05
4	A4	7	adam8	0.11321	-0.00152302
4	A4	8	adam8	0.116251	-0.00303653
4	A4	9	adam8	0.119742	-0.00410036
4	A4	10	adam8	0.123176	-0.00522087
4	A4	11	adam8	0.131325	-0.00162701
4	A4	12	adam8	0.138204	0.000697509
4	A4	13	adam8	0.145636	0.00357506
4	A4	14	adam8	0.149165	0.00254999
4	A4	15	adam8	0.153258	0.00208809
4	A4	16	adam8	0.156212	0.000488259
4	A4	17	adam8	0.159256	-0.00102314
4	A4	18	adam8	0.164363	-0.000470665
4	A4	19	adam8	0.170162	0.000774549
4	A4	20	adam8	0.181351	0.00740881
4	A4	21	adam8	0.201388	0.0228915
4	A4	22	adam8	0.240209	0.0571573
4	A4	23	adam8	0.309611	0.122005
4	A4	24	adam8	0.428187	0.236026
4	A4	25	adam8	0.615235	0.41852
4	A4	26	adam8	0.874259	0.672989
4	A4	27	adam8	1.16651	0.960686
4	A4	28	adam8	1.43319	1.22282
4	A4	29	adam8	1.63678	1.42184
4	A4	30	adam8	1.7748	1.55531
4	A4	31	adam8	1.8606	1.63656
4	A4	32	adam8	1.91613	1.68753
4	A4	33	adam8	1.94851	1.71536
4	A4	34	adam8	1.96576	1.72806
4	A4	35	adam8	1.97209	1.72983
4	A4	36	adam8	1.97167	1.72485
4	A4	37	adam8	1.96928	1.71791
4	A4	38	adam8	1.96774	1.71182
4	A4	39	adam8	1.96583	1.70535
4	A4	40	adam8	1.96246	1.69742
5	A5	1	adam8	0.0859289	-0.0118624
5	A5	2	adam8	0.087157	-0.0145847
5	A5	3	adam8	0.0924902	-0.0132018
5	A5	4	adam8	0.0998224	-0.0098199
5	A5	5	adam8	0.108846	-0.00474656
5	A5	6	adam8	0.119043	0.00149992
5	A5	7	adam8	0.131158	0.00966433
5	A5	8	adam8	0.13551	0.010066
5	A5	9	adam8	0.13901	0.00961648
5	A5	10	adam8	0.141136	0.00779163
5	A5	11	adam8	0.141177	0.00388248
5	A5	12	adam8	0.144164	0.00291886
5	A5	13	adam8	0.146287	0.00109195
5	A5	14	adam8	0.148763	-0.000382185
5	A5	15	adam8	0.149689	-0.00340659
5	A5	16	adam8	0.152418	-0.00462775
5	A5	17	adam8	0.155212	-0.00578418
5	A5	18	adam8	0.160384	-0.00456274
5	A5	19	adam8	0.168253	-0.000643477
5	A5	20	adam8	0.179428	0.00658055
5	A5	21	adam8	0.198312	0.0215149
5	A5	22	adam8	0.23467	0.0539224
5	A5	23	adam8	0.306231	0.121533
5	A5	24	adam8	0.427677	0.239029
5	A5	25	adam8	0.610374	0.417775
5	A5	26	adam8	0.852939	0.65639
5	A5	27	adam8	1.11858	0.918082
5	A5	28	adam8	1.35439	1.14994
5	A5	29	adam8	1.53486	1.32646
5	A5	30	adam8	1.66093	1.44858
5	A5	31	adam8	1.74475	1.52845
5	A5	32	adam8	1.8035	1.58324
5	A5	33	adam8	1.8441	1.6199
5	A5	34	adam8	1.87077	1.64261
5	A5	35	adam8	1.88969	1.65759
5	A5	36	adam8	1.89818	1.66213
5	A5	37	adam8	1.89861	1.65861
5	A5	38	adam8	1.89849	1.65454
5	A5	39	adam8	1.89709	1.64919
5	A5	40	adam8	1.89707	1.64522
6	A6	1	adam8	0.0773361	0.00357689
6	A6	2	adam8	0.078964	0.000812368
6	A6	3	adam8	0.0824541	-8.99728e-05
6	A6	4	adam8	0.0850007	-0.00193589
6	A6	5	adam8	0.0867173	-0.00461169
6	A6	6	adam8	0.0913126	-0.00440887
6	A6	7	adam8	0.0957069	-0.00440706
6	A6	8	adam8	0.103053	-0.00145383
6	A6	9	adam8	0.115089	0.00619021
6	A6	10	adam8	0.122829	0.00953745
6	A6	11	adam8	0.123358	0.00567418
6	A6	12	adam8	0.124768	0.00269145
6	A6	13	adam8	0.128857	0.00238788
6	A6	14	adam8	0.132544	0.0016826
6	A6	15	adam8	0.135728	0.00047481
6	A6	16	adam8	0.13788	-0.00176659
6	A6	17	adam8	0.141135	-0.00290369
6	A6	18	adam8	0.14416	-0.00427136
6	A6	19	adam8	0.150034	-0.00278962
6	A6	20	adam8	0.160216	0.00300003
6	A6	21	adam8	0.17972	0.0181113
6	A6	22	adam8	0.215061	0.0490601
6	A6	23	adam8	0.279242	0.108849
6	A6	24	adam8	0.392333	0.217547
6	A6	25	adam8	0.56944	0.390262
6	A6	26	adam8	0.815759	0.632188
6	A6	27	adam8	1.09462	0.906657
6	A6	28	adam8	1.35219	1.15983
6	A6	29	adam8	1.5507	1.35395
6	A6	30	adam8	1.68938	1.48824
6	A6	31	adam8	1.77845	1.57292
6	A6	32	adam8	1.83499	1.62507
6	A6	33	adam8	1.86922	1.6549
6	A6	34	adam8	1.88761	1.6689
6	A6	35	adam8	1.89586	1.67275
6	A6	36	adam8	1.89741	1.66992
6	A6	37	adam8	1.89444	1.66256
6	A6	38	adam8	1.8916	1.65532
6	A6	39	adam8	1.89087	1.65019
6	A6	40	adam8	1.88833	1.64327
7	A7	1
7	A7	2
7	A7	3
7	A7	4
7	A7	5
7	A7	6
7	A7	7
7	A7	8
7	A7	9
7	A7	10
7	A7	11
7	A7	12
7	A7	13
7	A7	14
7	A7	15
7	A7	16
7	A7	17
7	A7	18
7	A7	19
7	A7	20
7	A7	21
7	A7	22
7	A7	23
7	A7	24
7	A7	25
7	A7	26
7	A7	27
7	A7	28
7	A7	29
7	A7	30
7	A7	31
7	A7	32
7	A7	33
7	A7	34
7	A7	35
7	A7	36
7	A7	37
7	A7	38
7	A7	39
7	A7	40
8	A8	1
8	A8	2
8	A8	3
8	A8	4
8	A8	5
8	A8	6
8	A8	7
8	A8	8
8	A8	9
8	A8	10
8	A8	11
8	A8	12
8	A8	13
8	A8	14
8	A8	15
8	A8	16
8	A8	17
8	A8	18
8	A8	19
8	A8	20
8	A8	21
8	A8	22
8	A8	23
8	A8	24
8	A8	25
8	A8	26
8	A8	27
8	A8	28
8	A8	29
8	A8	30
8	A8	31
8	A8	32
8	A8	33
8	A8	34
8	A8	35
8	A8	36
8	A8	37
8	A8	38
8	A8	39
8	A8	40
9	A9	1
9	A9	2
9	A9	3
9	A9	4
9	A9	5
9	A9	6
9	A9	7
9	A9	8
9	A9	9
9	A9	10
9	A9	11
9	A9	12
9	A9	13
9	A9	14
9	A9	15
9	A9	16
9	A9	17
9	A9	18
9	A9	19
9	A9	20
9	A9	21
9	A9	22
9	A9	23
9	A9	24
9	A9	25
9	A9	26
9	A9	27
9	A9	28
9	A9	29
9	A9	30
9	A9	31
9	A9	32
9	A9	33
9	A9	34
9	A9	35
9	A9	36
9	A9	37
9	A9	38
9	A9	39
9	A9	40
10	A10	1
10	A10	2
10	A10	3
10	A10	4
10	A10	5
10	A10	6
10	A10	7
10	A10	8
10	A10	9
10	A10	10
10	A10	11
10	A10	12
10	A10	13
10	A10	14
10	A10	15
10	A10	16
10	A10	17
10	A10	18
10	A10	19
10	A10	20
10	A10	21
10	A10	22
10	A10	23
10	A10	24
10	A10	25
10	A10	26
10	A10	27
10	A10	28
10	A10	29
10	A10	30
10	A10	31
10	A10	32
10	A10	33
10	A10	34
10	A10	35
10	A10	36
10	A10	37
10	A10	38
10	A10	39
10	A10	40
11	A11	1
11	A11	2
11	A11	3
11	A11	4
11	A11	5
11	A11	6
11	A11	7
11	A11	8
11	A11	9
11	A11	10
11	A11	11
11	A11	12
11	A11	13
11	A11	14
11	A11	15
11	A11	16
11	A11	17
11	A11	18
11	A11	19
11	A11	20
11	A11	21
11	A11	22
11	A11	23
11	A11	24
11	A11	25
11	A11	26
11	A11	27
11	A11	28
11	A11	29
11	A11	30
11	A11	31
11	A11	32
11	A11	33
11	A11	34
11	A11	35
11	A11	36
11	A11	37
11	A11	38
11	A11	39
11	A11	40
12	A12	1
12	A12	2
12	A12	3
12	A12	4
12	A12	5
12	A12	6
12	A12	7
12	A12	8
12	A12	9
12	A12	10
12	A12	11
12	A12	12
12	A12	13
12	A12	14
12	A12	15
12	A12	16
12	A12	17
12	A12	18
12	A12	19
12	A12	20
12	A12	21
12	A12	22
12	A12	23
12	A12	24
12	A12	25
12	A12	26
12	A12	27
12	A12	28
12	A12	29
12	A12	30
12	A12	31
12	A12	32
12	A12	33
12	A12	34
12	A12	35
12	A12	36
12	A12	37
12	A12	38
12	A12	39
12	A12	40
13	B1	1
13	B1	2
13	B1	3
13	B1	4
13	B1	5
13	B1	6
13	B1	7
13	B1	8
13	B1	9
13	B1	10
13	B1	11
13	B1	12
13	B1	13
13	B1	14
13	B1	15
13	B1	16
13	B1	17
13	B1	18
13	B1	19
13	B1	20
13	B1	21
13	B1	22
13	B1	23
13	B1	24
13	B1	25
13	B1	26
13	B1	27
13	B1	28
13	B1	29
13	B1	30
13	B1	31
13	B1	32
13	B1	33
13	B1	34
13	B1	35
13	B1	36
13	B1	37
13	B1	38
13	B1	39
13	B1	40
14	B2	1
14	B2	2
14	B2	3
14	B2	4
14	B2	5
14	B2	6
14	B2	7
14	B2	8
14	B2	9
14	B2	10
14	B2	11
14	B2	12
14	B2	13
14	B2	14
14	B2	15
14	B2	16
14	B2	17
14	B2	18
14	B2	19
14	B2	20
14	B2	21
14	B2	22
14	B2	23
14	B2	24
14	B2	25
14	B2	26
14	B2	27
14	B2	28
14	B2	29
14	B2	30
14	B2	31
14	B2	32
14	B2	33
14	B2	34
14	B2	35
14	B2	36
14	B2	37
14	B2	38
14	B2	39
14	B2	40
15	B3	1
15	B3	2
15	B3	3
15	B3	4
15	B3	5
15	B3	6
15	B3	7
15	B3	8
15	B3	9
15	B3	10
15	B3	11
15	B3	12
15	B3	13
15	B3	14
15	B3	15
15	B3	16
15	B3	17
15	B3	18
15	B3	19
15	B3	20
15	B3	21
15	B3	22
15	B3	23
15	B3	24
15	B3	25
15	B3	26
15	B3	27
15	B3	28
15	B3	29
15	B3	30
15	B3	31
15	B3	32
15	B3	33
15	B3	34
15	B3	35
15	B3	36
15	B3	37
15	B3	38
15	B3	39
15	B3	40
16	B4	1
16	B4	2
16	B4	3
16	B4	4
16	B4	5
16	B4	6
16	B4	7
16	B4	8
16	B4	9
16	B4	10
16	B4	11
16	B4	12
16	B4	13
16	B4	14
16	B4	15
16	B4	16
16	B4	17
16	B4	18
16	B4	19
16	B4	20
16	B4	21
16	B4	22
16	B4	23
16	B4	24
16	B4	25
16	B4	26
16	B4	27
16	B4	28
16	B4	29
16	B4	30
16	B4	31
16	B4	32
16	B4	33
16	B4	34
16	B4	35
16	B4	36
16	B4	37
16	B4	38
16	B4	39
16	B4	40
17	B5	1
17	B5	2
17	B5	3
17	B5	4
17	B5	5
17	B5	6
17	B5	7
17	B5	8
17	B5	9
17	B5	10
17	B5	11
17	B5	12
17	B5	13
17	B5	14
17	B5	15
17	B5	16
17	B5	17
17	B5	18
17	B5	19
17	B5	20
17	B5	21
17	B5	22
17	B5	23
17	B5	24
17	B5	25
17	B5	26
17	B5	27
17	B5	28
17	B5	29
17	B5	30
17	B5	31
17	B5	32
17	B5	33
17	B5	34
17	B5	35
17	B5	36
17	B5	37
17	B5	38
17	B5	39
17	B5	40
18	B6	1
18	B6	2
18	B6	3
18	B6	4
18	B6	5
18	B6	6
18	B6	7
18	B6	8
18	B6	9
18	B6	10
18	B6	11
18	B6	12
18	B6	13
18	B6	14
18	B6	15
18	B6	16
18	B6	17
18	B6	18
18	B6	19
18	B6	20
18	B6	21
18	B6	22
18	B6	23
18	B6	24
18	B6	25
18	B6	26
18	B6	27
18	B6	28
18	B6	29
18	B6	30
18	B6	31
18	B6	32
18	B6	33
18	B6	34
18	B6	35
18	B6	36
18	B6	37
18	B6	38
18	B6	39
18	B6	40
19	B7	1
19	B7	2
19	B7	3
19	B7	4
19	B7	5
19	B7	6
19	B7	7
19	B7	8
19	B7	9
19	B7	10
19	B7	11
19	B7	12
19	B7	13
19	B7	14
19	B7	15
19	B7	16
19	B7	17
19	B7	18
19	B7	19
19	B7	20
19	B7	21
19	B7	22
19	B7	23
19	B7	24
19	B7	25
19	B7	26
19	B7	27
19	B7	28
19	B7	29
19	B7	30
19	B7	31
19	B7	32
19	B7	33
19	B7	34
19	B7	35
19	B7	36
19	B7	37
19	B7	38
19	B7	39
19	B7	40
20	B8	1
20	B8	2
20	B8	3
20	B8	4
20	B8	5
20	B8	6
20	B8	7
20	B8	8
20	B8	9
20	B8	10
20	B8	11
20	B8	12
20	B8	13
20	B8	14
20	B8	15
20	B8	16
20	B8	17
20	B8	18
20	B8	19
20	B8	20
20	B8	21
20	B8	22
20	B8	23
20	B8	24
20	B8	25
20	B8	26
20	B8	27
20	B8	28
20	B8	29
20	B8	30
20	B8	31
20	B8	32
20	B8	33
20	B8	34
20	B8	35
20	B8	36
20	B8	37
20	B8	38
20	B8	39
20	B8	40
21	B9	1
21	B9	2
21	B9	3
21	B9	4
21	B9	5
21	B9	6
21	B9	7
21	B9	8
21	B9	9
21	B9	10
21	B9	11
21	B9	12
21	B9	13
21	B9	14
21	B9	15
21	B9	16
21	B9	17
21	B9	18
21	B9	19
21	B9	20
21	B9	21
21	B9	22
21	B9	23
21	B9	24
21	B9	25
21	B9	26
21	B9	27
21	B9	28
21	B9	29
21	B9	30
21	B9	31
21	B9	32
21	B9	33
21	B9	34
21	B9	35
21	B9	36
21	B9	37
21	B9	38
21	B9	39
21	B9	40
22	B10	1
22	B10	2
22	B10	3
22	B10	4
22	B10	5
22	B10	6
22	B10	7
22	B10	8
22	B10	9
22	B10	10
22	B10	11
22	B10	12
22	B10	13
22	B10	14
22	B10	15
22	B10	16
22	B10	17
22	B10	18
22	B10	19
22	B10	20
22	B10	21
22	B10	22
22	B10	23
22	B10	24
22	B10	25
22	B10	26
22	B10	27
22	B10	28
22	B10	29
22	B10	30
22	B10	31
22	B10	32
22	B10	33
22	B10	34
22	B10	35
22	B10	36
22	B10	37
22	B10	38
22	B10	39
22	B10	40
23	B11	1
23	B11	2
23	B11	3
23	B11	4
23	B11	5
23	B11	6
23	B11	7
23	B11	8
23	B11	9
23	B11	10
23	B11	11
23	B11	12
23	B11	13
23	B11	14
23	B11	15
23	B11	16
23	B11	17
23	B11	18
23	B11	19
23	B11	20
23	B11	21
23	B11	22
23	B11	23
23	B11	24
23	B11	25
23	B11	26
23	B11	27
23	B11	28
23	B11	29
23	B11	30
23	B11	31
23	B11	32
23	B11	33
23	B11	34
23	B11	35
23	B11	36
23	B11	37
23	B11	38
23	B11	39
23	B11	40
24	B12	1
24	B12	2
24	B12	3
24	B12	4
24	B12	5
24	B12	6
24	B12	7
24	B12	8
24	B12	9
24	B12	10
24	B12	11
24	B12	12
24	B12	13
24	B12	14
24	B12	15
24	B12	16
24	B12	17
24	B12	18
24	B12	19
24	B12	20
24	B12	21
24	B12	22
24	B12	23
24	B12	24
24	B12	25
24	B12	26
24	B12	27
24	B12	28
24	B12	29
24	B12	30
24	B12	31
24	B12	32
24	B12	33
24	B12	34
24	B12	35
24	B12	36
24	B12	37
24	B12	38
24	B12	39
24	B12	40
25	C1	1	gapdh	0.0488613	-0.00377231
25	C1	2	gapdh	0.0504673	-0.0038385
25	C1	3	gapdh	0.0544359	-0.00154218
25	C1	4	gapdh	0.0573865	-0.00026383
25	C1	5	gapdh	0.0608224	0.00149979
25	C1	6	gapdh	0.0620467	0.00105186
25	C1	7	gapdh	0.0637396	0.00107247
25	C1	8	gapdh	0.0648425	0.000503134
25	C1	9	gapdh	0.0653948	-0.000616903
25	C1	10	gapdh	0.0674183	-0.00026563
25	C1	11	gapdh	0.0689852	-0.000370966
25	C1	12	gapdh	0.0696111	-0.00141735
25	C1	13	gapdh	0.0711205	-0.00158016
25	C1	14	gapdh	0.0731407	-0.00123225
25	C1	15	gapdh	0.0792072	0.00316202
25	C1	16	gapdh	0.085647	0.00792953
25	C1	17	gapdh	0.102272	0.0228824
25	C1	18	gapdh	0.133503	0.0524414
25	C1	19	gapdh	0.1909	0.108166
25	C1	20	gapdh	0.293431	0.209024
25	C1	21	gapdh	0.464801	0.378722
25	C1	22	gapdh	0.710932	0.623181
25	C1	23	gapdh	1.00732	0.917893
25	C1	24	gapdh	1.2906	1.19951
25	C1	25	gapdh	1.50395	1.41118
25	C1	26	gapdh	1.63533	1.54089
25	C1	27	gapdh	1.70069	1.60457
25	C1	28	gapdh	1.71664	1.61885
25	C1	29	gapdh	1.70094	1.60148
25	C1	30	gapdh	1.67986	1.57873
25	C1	31	gapdh	1.66788	1.56508
25	C1	32	gapdh	1.66008	1.55561
25	C1	33	gapdh	1.65502	1.54887
25	C1	34	gapdh	1.65256	1.54475
25	C1	35	gapdh	1.65156	1.54207
25	C1	36	gapdh	1.65398	1.54281
25	C1	37	gapdh	1.6593	1.54647
25	C1	38	gapdh	1.66827	1.55376
25	C1	39	gapdh	1.68297	1.56679
25	C1	40	gapdh	1.6978	1.57995
26	C2	1	gapdh	0.0667293	-0.000671185
26	C2	2	gapdh	0.067908	-0.00171982
26	C2	3	gapdh	0.0699917	-0.00186332
26	C2	4	gapdh	0.0729351	-0.00114719
26	C2	5	gapdh	0.0772596	0.000950043
26	C2	6	gapdh	0.0808453	0.00230844
26	C2	7	gapdh	0.0828672	0.00210311
26	C2	8	gapdh	0.0837953	0.00080387
26	C2	9	gapdh	0.0850943	-0.000124328
26	C2	10	gapdh	0.0874967	5.07486e-05
26	C2	11	gapdh	0.0878901	-0.00178314
26	C2	12	gapdh	0.0894649	-0.00243557
26	C2	13	gapdh	0.0930188	-0.00110895
26	C2	14	gapdh	0.0957551	-0.000599855
26	C2	15	gapdh	0.101428	0.00284616
26	C2	16	gapdh	0.110299	0.00948963
26	C2	17	gapdh	0.128125	0.0250885
26	C2	18	gapdh	0.161579	0.0563145
26	C2	19	gapdh	0.22447	0.116979
26	C2	20	gapdh	0.337789	0.228071
26	C2	21	gapdh	0.520626	0.40868
26	C2	22	gapdh	0.785188	0.671015
26	C2	23	gapdh	1.09792	0.981515
26	C2	24	gapdh	1.38884	1.27021
26	C2	25	gapdh	1.60455	1.48369
26	C2	26	gapdh	1.73679	1.61371
26	C2	27	gapdh	1.80611	1.6808
26	C2	28	gapdh	1.83469	1.70716
26	C2	29	gapdh	1.83571	1.70595
26	C2	30	gapdh	1.81781	1.68582
26	C2	31	gapdh	1.8033	1.66908
26	C2	32	gapdh	1.79135	1.6549
26	C2	33	gapdh	1.78218	1.6435
26	C2	34	gapdh	1.77749	1.63659
26	C2	35	gapdh	1.77957	1.63644
26	C2	36	gapdh	1.78457	1.63921
26	C2	37	gapdh	1.79307	1.64549
26	C2	38	gapdh	1.80823	1.65842
26	C2	39	gapdh	1.82677	1.67473
26	C2	40	gapdh	1.84768	1.69342
27	C3	1	gapdh	0.052667	-0.00156108
27	C3	2	gapdh	0.0538754	-0.00293283
27	C3	3	gapdh	0.0575372	-0.00185119
27	C3	4	gapdh	0.060878	-0.00109055
27	C3	5	gapdh	0.0637636	-0.000785093
27	C3	6	gapdh	0.0671783	4.94369e-05
27	C3	7	gapdh	0.0700453	0.000336327
27	C3	8	gapdh	0.0754336	0.00314442
27	C3	9	gapdh	0.0777514	0.00288213
27	C3	10	gapdh	0.0787674	0.00131795
27	C3	11	gapdh	0.0801749	0.000145272
27	C3	12	gapdh	0.0819362	-0.000673564
27	C3	13	gapdh	0.0831368	-0.00205307
27	C3	14	gapdh	0.0863479	-0.00142208
27	C3	15	gapdh	0.0924357	0.00208549
27	C3	16	gapdh	0.103237	0.0103067
27	C3	17	gapdh	0.122924	0.0274133
27	C3	18	gapdh	0.158475	0.0603842
27	C3	19	gapdh	0.224237	0.123566
27	C3	20	gapdh	0.342402	0.239151
27	C3	21	gapdh	0.53495	0.429119
27	C3	22	gapdh	0.80886	0.700449
27	C3	23	gapdh	1.12911	1.01812
27	C3	24	gapdh	1.42207	1.3085
27	C3	25	gapdh	1.63514	1.51899
27	C3	26	gapdh	1.76155	1.64282
27	C3	27	gapdh	1.82819	1.70688
27	C3	28	gapdh	1.85312	1.72923
27	C3	29	gapdh	1.85272	1.72625
27	C3	30	gapdh	1.83337	1.70432
27	C3	31	gapdh	1.81731	1.68567
27	C3	32	gapdh	1.8062	1.67198
27	C3	33	gapdh	1.79974	1.66295
27	C3	34	gapdh	1.7956	1.65623
27	C3	35	gapdh	1.7947	1.65274
27	C3	36	gapdh	1.79549	1.65095
27	C3	37	gapdh	1.79787	1.65076
27	C3	38	gapdh	1.80292	1.65322
27	C3	39	gapdh	1.81039	1.65812
27	C3	40	gapdh	1.8208	1.66595
28	C4	1	adam8	0.0385717	-0.00218074
28	C4	2	adam8	0.0397289	-0.00275493
28	C4	3	adam8	0.0423433	-0.00187182
28	C4	4	adam8	0.0446085	-0.00133798
28	C4	5	adam8	0.0472012	-0.00047653
28	C4	6	adam8	0.0496465	0.000237425
28	C4	7	adam8	0.0508253	-0.000315144
28	C4	8	adam8	0.0519975	-0.00087421
28	C4	9	adam8	0.0556564	0.00105336
28	C4	10	adam8	0.0571817	0.000847319
28	C4	11	adam8	0.0603564	0.00229072
28	C4	12	adam8	0.0629134	0.00311638
28	C4	13	adam8	0.0629538	0.00142539
28	C4	14	adam8	0.0638497	0.00058997
28	C4	15	adam8	0.0649878	-3.25006e-06
28	C4	16	adam8	0.066738	1.56178e-05
28	C4	17	adam8	0.0677043	-0.000749368
28	C4	18	adam8	0.0687627	-0.00142234
28	C4	19	adam8	0.0702006	-0.00171573
28	C4	20	adam8	0.0721149	-0.00153273
28	C4	21	adam8	0.0761019	0.000722924
28	C4	22	adam8	0.0830446	0.00593433
28	C4	23	adam8	0.0940469	0.0152053
28	C4	24	adam8	0.117239	0.0366658
28	C4	25	adam8	0.158485	0.0761812
28	C4	26	adam8	0.235269	0.151233
28	C4	27	adam8	0.367371	0.281604
28	C4	28	adam8	0.572846	0.485348
28	C4	29	adam8	0.846894	0.757664
28	C4	30	adam8	1.14772	1.05676
28	C4	31	adam8	1.41597	1.32328
28	C4	32	adam8	1.62076	1.52634
28	C4	33	adam8	1.76062	1.66446
28	C4	34	adam8	1.85694	1.75906
28	C4	35	adam8	1.9229	1.82329
28	C4	36	adam8	1.96596	1.86461
28	C4	37	adam8	1.99461	1.89153
28	C4	38	adam8	2.00948	1.90467
28	C4	39	adam8	2.01617	1.90963
28	C4	40	adam8	2.0179	1.90962
29	C5	1	adam8	0.0325866	-0.00209134
29	C5	2	adam8	0.0337628	-0.00252257
29	C5	3	adam8	0.0367847	-0.00110806
29	C5	4	adam8	0.0382777	-0.00122259
29	C5	5	adam8	0.0403952	-0.00071248
29	C5	6	adam8	0.042163	-0.000552139
29	C5	7	adam8	0.0433025	-0.0010201
29	C5	8	adam8	0.0448394	-0.00109058
29	C5	9	adam8	0.0465061	-0.00103141
29	C5	10	adam8	0.052124	0.00297908
29	C5	11	adam8	0.054523	0.0037706
29	C5	12	adam8	0.055003	0.00264316
29	C5	13	adam8	0.0553943	0.00142704
29	C5	14	adam8	0.0567586	0.00118388
29	C5	15	adam8	0.0580304	0.000848224
29	C5	16	adam8	0.0582646	-0.000524973
29	C5	17	adam8	0.0589811	-0.00141591
29	C5	18	adam8	0.0602571	-0.00174735
29	C5	19	adam8	0.061959	-0.00165286
29	C5	20	adam8	0.0642452	-0.000974172
29	C5	21	adam8	0.0670274	0.000200647
29	C5	22	adam8	0.0728879	0.0044537
29	C5	23	adam8	0.0844194	0.0143777
29	C5	24	adam8	0.107203	0.035554
29	C5	25	adam8	0.146879	0.0736224
29	C5	26	adam8	0.219634	0.14477
29	C5	27	adam8	0.34631	0.269839
29	C5	28	adam8	0.54399	0.465911
29	C5	29	adam8	0.806933	0.727247
29	C5	30	adam8	1.0933	1.01201
29	C5	31	adam8	1.35149	1.26859
29	C5	32	adam8	1.54762	1.46311
29	C5	33	adam8	1.68347	1.59735
29	C5	34	adam8	1.77504	1.68732
29	C5	35	adam8	1.83541	1.74608
29	C5	36	adam8	1.87792	1.78698
29	C5	37	adam8	1.90772	1.81517
29	C5	38	adam8	1.92601	1.83186
29	C5	39	adam8	1.93144	1.83568
29	C5	40	adam8	1.9292	1.83183
30	C6	1	adam8	0.0573634	-0.00132631
30	C6	2	adam8	0.0594477	-0.00121913
30	C6	3	adam8	0.062223	-0.000421023
30	C6	4	adam8	0.0638169	-0.000804293
30	C6	5	adam8	0.0657267	-0.000871638
30	C6	6	adam8	0.0684104	-0.000165003
30	C6	7	adam8	0.0705803	2.77134e-05
30	C6	8	adam8	0.072958	0.000428271
30	C6	9	adam8	0.0748346	0.0003278
30	C6	10	adam8	0.0761665	-0.000317502
30	C6	11	adam8	0.0789288	0.000467707
30	C6	12	adam8	0.0809376	0.000499387
30	C6	13	adam8	0.0835951	0.0011797
30	C6	14	adam8	0.0858536	0.00146106
30	C6	15	adam8	0.087384	0.00101432
30	C6	16	adam8	0.0885385	0.000191685
30	C6	17	adam8	0.090626	0.000302035
30	C6	18	adam8	0.0919967	-0.000304427
30	C6	19	adam8	0.0926127	-0.00166556
30	C6	20	adam8	0.0946868	-0.0015686
30	C6	21	adam8	0.0984509	0.000218365
30	C6	22	adam8	0.105582	0.00537224
30	C6	23	adam8	0.118523	0.016336
30	C6	24	adam8	0.138483	0.0343195
30	C6	25	adam8	0.176291	0.0701501
30	C6	26	adam8	0.245276	0.137158
30	C6	27	adam8	0.363643	0.253548
30	C6	28	adam8	0.554766	0.442694
30	C6	29	adam8	0.822313	0.708264
30	C6	30	adam8	1.13077	1.01475
30	C6	31	adam8	1.41959	1.30159
30	C6	32	adam8	1.64636	1.52637
30	C6	33	adam8	1.80107	1.67911
30	C6	34	adam8	1.90272	1.77878
30	C6	35	adam8	1.96494	1.83903
30	C6	36	adam8	2.00302	1.87513
30	C6	37	adam8	2.02497	1.8951
30	C6	38	adam8	2.03193	1.90009
30	C6	39	adam8	2.0316	1.89778
30	C6	40	adam8	2.02801	1.89221
31	C7	1
31	C7	2
31	C7	3
31	C7	4
31	C7	5
31	C7	6
31	C7	7
31	C7	8
31	C7	9
31	C7	10
31	C7	11
31	C7	12
31	C7	13
31	C7	14
31	C7	15
31	C7	16
31	C7	17
31	C7	18
31	C7	19
31	C7	20
31	C7	21
31	C7	22
31	C7	23
31	C7	24
31	C7	25
31	C7	26
31	C7	27
31	C7	28
31	C7	29
31	C7	30
31	C7	31
31	C7	32
31	C7	33
31	C7	34
31	C7	35
31	C7	36
31	C7	37
31	C7	38
31	C7	39
31	C7	40
32	C8	1
32	C8	2
32	C8	3
32	C8	4
32	C8	5
32	C8	6
32	C8	7
32	C8	8
32	C8	9
32	C8	10
32	C8	11
32	C8	12
32	C8	13
32	C8	14
32	C8	15
32	C8	16
32	C8	17
32	C8	18
32	C8	19
32	C8	20
32	C8	21
32	C8	22
32	C8	23
32	C8	24
32	C8	25
32	C8	26
32	C8	27
32	C8	28
32	C8	29
32	C8	30
32	C8	31
32	C8	32
32	C8	33
32	C8	34
32	C8	35
32	C8	36
32	C8	37
32	C8	38
32	C8	39
32	C8	40
33	C9	1
33	C9	2
33	C9	3
33	C9	4
33	C9	5
33	C9	6
33	C9	7
33	C9	8
33	C9	9
33	C9	10
33	C9	11
33	C9	12
33	C9	13
33	C9	14
33	C9	15
33	C9	16
33	C9	17
33	C9	18
33	C9	19
33	C9	20
33	C9	21
33	C9	22
33	C9	23
33	C9	24
33	C9	25
33	C9	26
33	C9	27
33	C9	28
33	C9	29
33	C9	30
33	C9	31
33	C9	32
33	C9	33
33	C9	34
33	C9	35
33	C9	36
33	C9	37
33	C9	38
33	C9	39
33	C9	40
34	C10	1
34	C10	2
34	C10	3
34	C10	4
34	C10	5
34	C10	6
34	C10	7
34	C10	8
34	C10	9
34	C10	10
34	C10	11
34	C10	12
34	C10	13
34	C10	14
34	C10	15
34	C10	16
34	C10	17
34	C10	18
34	C10	19
34	C10	20
34	C10	21
34	C10	22
34	C10	23
34	C10	24
34	C10	25
34	C10	26
34	C10	27
34	C10	28
34	C10	29
34	C10	30
34	C10	31
34	C10	32
34	C10	33
34	C10	34
34	C10	35
34	C10	36
34	C10	37
34	C10	38
34	C10	39
34	C10	40
35	C11	1
35	C11	2
35	C11	3
35	C11	4
35	C11	5
35	C11	6
35	C11	7
35	C11	8
35	C11	9
35	C11	10
35	C11	11
35	C11	12
35	C11	13
35	C11	14
35	C11	15
35	C11	16
35	C11	17
35	C11	18
35	C11	19
35	C11	20
35	C11	21
35	C11	22
35	C11	23
35	C11	24
35	C11	25
35	C11	26
35	C11	27
35	C11	28
35	C11	29
35	C11	30
35	C11	31
35	C11	32
35	C11	33
35	C11	34
35	C11	35
35	C11	36
35	C11	37
35	C11	38
35	C11	39
35	C11	40
36	C12	1
36	C12	2
36	C12	3
36	C12	4
36	C12	5
36	C12	6
36	C12	7
36	C12	8
36	C12	9
36	C12	10
36	C12	11
36	C12	12
36	C12	13
36	C12	14
36	C12	15
36	C12	16
36	C12	17
36	C12	18
36	C12	19
36	C12	20
36	C12	21
36	C12	22
36	C12	23
36	C12	24
36	C12	25
36	C12	26
36	C12	27
36	C12	28
36	C12	29
36	C12	30
36	C12	31
36	C12	32
36	C12	33
36	C12	34
36	C12	35
36	C12	36
36	C12	37
36	C12	38
36	C12	39
36	C12	40
37	D1	1
37	D1	2
37	D1	3
37	D1	4
37	D1	5
37	D1	6
37	D1	7
37	D1	8
37	D1	9
37	D1	10
37	D1	11
37	D1	12
37	D1	13
37	D1	14
37	D1	15
37	D1	16
37	D1	17
37	D1	18
37	D1	19
37	D1	20
37	D1	21
37	D1	22
37	D1	23
37	D1	24
37	D1	25
37	D1	26
37	D1	27
37	D1	28
37	D1	29
37	D1	30
37	D1	31
37	D1	32
37	D1	33
37	D1	34
37	D1	35
37	D1	36
37	D1	37
37	D1	38
37	D1	39
37	D1	40
38	D2	1
38	D2	2
38	D2	3
38	D2	4
38	D2	5
38	D2	6
38	D2	7
38	D2	8
38	D2	9
38	D2	10
38	D2	11
38	D2	12
38	D2	13
38	D2	14
38	D2	15
38	D2	16
38	D2	17
38	D2	18
38	D2	19
38	D2	20
38	D2	21
38	D2	22
38	D2	23
38	D2	24
38	D2	25
38	D2	26
38	D2	27
38	D2	28
38	D2	29
38	D2	30
38	D2	31
38	D2	32
38	D2	33
38	D2	34
38	D2	35
38	D2	36
38	D2	37
38	D2	38
38	D2	39
38	D2	40
39	D3	1
39	D3	2
39	D3	3
39	D3	4
39	D3	5
39	D3	6
39	D3	7
39	D3	8
39	D3	9
39	D3	10
39	D3	11
39	D3	12
39	D3	13
39	D3	14
39	D3	15
39	D3	16
39	D3	17
39	D3	18
39	D3	19
39	D3	20
39	D3	21
39	D3	22
39	D3	23
39	D3	24
39	D3	25
39	D3	26
39	D3	27
39	D3	28
39	D3	29
39	D3	30
39	D3	31
39	D3	32
39	D3	33
39	D3	34
39	D3	35
39	D3	36
39	D3	37
39	D3	38
39	D3	39
39	D3	40
40	D4	1
40	D4	2
40	D4	3
40	D4	4
40	D4	5
40	D4	6
40	D4	7
40	D4	8
40	D4	9
40	D4	10
40	D4	11
40	D4	12
40	D4	13
40	D4	14
40	D4	15
40	D4	16
40	D4	17
40	D4	18
40	D4	19
40	D4	20
40	D4	21
40	D4	22
40	D4	23
40	D4	24
40	D4	25
40	D4	26
40	D4	27
40	D4	28
40	D4	29
40	D4	30
40	D4	31
40	D4	32
40	D4	33
40	D4	34
40	D4	35
40	D4	36
40	D4	37
40	D4	38
40	D4	39
40	D4	40
41	D5	1
41	D5	2
41	D5	3
41	D5	4
41	D5	5
41	D5	6
41	D5	7
41	D5	8
41	D5	9
41	D5	10
41	D5	11
41	D5	12
41	D5	13
41	D5	14
41	D5	15
41	D5	16
41	D5	17
41	D5	18
41	D5	19
41	D5	20
41	D5	21
41	D5	22
41	D5	23
41	D5	24
41	D5	25
41	D5	26
41	D5	27
41	D5	28
41	D5	29
41	D5	30
41	D5	31
41	D5	32
41	D5	33
41	D5	34
41	D5	35
41	D5	36
41	D5	37
41	D5	38
41	D5	39
41	D5	40
42	D6	1
42	D6	2
42	D6	3
42	D6	4
42	D6	5
42	D6	6
42	D6	7
42	D6	8
42	D6	9
42	D6	10
42	D6	11
42	D6	12
42	D6	13
42	D6	14
42	D6	15
42	D6	16
42	D6	17
42	D6	18
42	D6	19
42	D6	20
42	D6	21
42	D6	22
42	D6	23
42	D6	24
42	D6	25
42	D6	26
42	D6	27
42	D6	28
42	D6	29
42	D6	30
42	D6	31
42	D6	32
42	D6	33
42	D6	34
42	D6	35
42	D6	36
42	D6	37
42	D6	38
42	D6	39
42	D6	40
43	D7	1
43	D7	2
43	D7	3
43	D7	4
43	D7	5
43	D7	6
43	D7	7
43	D7	8
43	D7	9
43	D7	10
43	D7	11
43	D7	12
43	D7	13
43	D7	14
43	D7	15
43	D7	16
43	D7	17
43	D7	18
43	D7	19
43	D7	20
43	D7	21
43	D7	22
43	D7	23
43	D7	24
43	D7	25
43	D7	26
43	D7	27
43	D7	28
43	D7	29
43	D7	30
43	D7	31
43	D7	32
43	D7	33
43	D7	34
43	D7	35
43	D7	36
43	D7	37
43	D7	38
43	D7	39
43	D7	40
44	D8	1
44	D8	2
44	D8	3
44	D8	4
44	D8	5
44	D8	6
44	D8	7
44	D8	8
44	D8	9
44	D8	10
44	D8	11
44	D8	12
44	D8	13
44	D8	14
44	D8	15
44	D8	16
44	D8	17
44	D8	18
44	D8	19
44	D8	20
44	D8	21
44	D8	22
44	D8	23
44	D8	24
44	D8	25
44	D8	26
44	D8	27
44	D8	28
44	D8	29
44	D8	30
44	D8	31
44	D8	32
44	D8	33
44	D8	34
44	D8	35
44	D8	36
44	D8	37
44	D8	38
44	D8	39
44	D8	40
45	D9	1
45	D9	2
45	D9	3
45	D9	4
45	D9	5
45	D9	6
45	D9	7
45	D9	8
45	D9	9
45	D9	10
45	D9	11
45	D9	12
45	D9	13
45	D9	14
45	D9	15
45	D9	16
45	D9	17
45	D9	18
45	D9	19
45	D9	20
45	D9	21
45	D9	22
45	D9	23
45	D9	24
45	D9	25
45	D9	26
45	D9	27
45	D9	28
45	D9	29
45	D9	30
45	D9	31
45	D9	32
45	D9	33
45	D9	34
45	D9	35
45	D9	36
45	D9	37
45	D9	38
45	D9	39
45	D9	40
46	D10	1
46	D10	2
46	D10	3
46	D10	4
46	D10	5
46	D10	6
46	D10	7
46	D10	8
46	D10	9
46	D10	10
46	D10	11
46	D10	12
46	D10	13
46	D10	14
46	D10	15
46	D10	16
46	D10	17
46	D10	18
46	D10	19
46	D10	20
46	D10	21
46	D10	22
46	D10	23
46	D10	24
46	D10	25
46	D10	26
46	D10	27
46	D10	28
46	D10	29
46	D10	30
46	D10	31
46	D10	32
46	D10	33
46	D10	34
46	D10	35
46	D10	36
46	D10	37
46	D10	38
46	D10	39
46	D10	40
47	D11	1
47	D11	2
47	D11	3
47	D11	4
47	D11	5
47	D11	6
47	D11	7
47	D11	8
47	D11	9
47	D11	10
47	D11	11
47	D11	12
47	D11	13
47	D11	14
47	D11	15
47	D11	16
47	D11	17
47	D11	18
47	D11	19
47	D11	20
47	D11	21
47	D11	22
47	D11	23
47	D11	24
47	D11	25
47	D11	26
47	D11	27
47	D11	28
47	D11	29
47	D11	30
47	D11	31
47	D11	32
47	D11	33
47	D11	34
47	D11	35
47	D11	36
47	D11	37
47	D11	38
47	D11	39
47	D11	40
48	D12	1
48	D12	2
48	D12	3
48	D12	4
48	D12	5
48	D12	6
48	D12	7
48	D12	8
48	D12	9
48	D12	10
48	D12	11
48	D12	12
48	D12	13
48	D12	14
48	D12	15
48	D12	16
48	D12	17
48	D12	18
48	D12	19
48	D12	20
48	D12	21
48	D12	22
48	D12	23
48	D12	24
48	D12	25
48	D12	26
48	D12	27
48	D12	28
48	D12	29
48	D12	30
48	D12	31
48	D12	32
48	D12	33
48	D12	34
48	D12	35
48	D12	36
48	D12	37
48	D12	38
48	D12	39
48	D12	40
49	E1	1	gapdh	0.091691	-0.00209774
49	E1	2	gapdh	0.0940333	-0.00553105
49	E1	3	gapdh	0.10128	-0.00405967
49	E1	4	gapdh	0.107756	-0.00335975
49	E1	5	gapdh	0.114021	-0.00286977
49	E1	6	gapdh	0.124584	0.00191753
49	E1	7	gapdh	0.13562	0.00717782
49	E1	8	gapdh	0.140198	0.00598079
49	E1	9	gapdh	0.143524	0.00353121
49	E1	10	gapdh	0.146716	0.000947546
49	E1	11	gapdh	0.148898	-0.00264624
49	E1	12	gapdh	0.153044	-0.00427603
49	E1	13	gapdh	0.160752	-0.00234345
49	E1	14	gapdh	0.172633	0.00376188
49	E1	15	gapdh	0.192688	0.0180411
49	E1	16	gapdh	0.230949	0.050527
49	E1	17	gapdh	0.299292	0.113095
49	E1	18	gapdh	0.420239	0.228266
49	E1	19	gapdh	0.616762	0.419013
49	E1	20	gapdh	0.888661	0.685136
49	E1	21	gapdh	1.19516	0.985858
49	E1	22	gapdh	1.46731	1.25224
49	E1	23	gapdh	1.6606	1.43974
49	E1	24	gapdh	1.77337	1.54675
49	E1	25	gapdh	1.82481	1.59241
49	E1	26	gapdh	1.83376	1.59558
49	E1	27	gapdh	1.81845	1.5745
49	E1	28	gapdh	1.80319	1.55346
49	E1	29	gapdh	1.79415	1.53865
49	E1	30	gapdh	1.78774	1.52646
49	E1	31	gapdh	1.78495	1.51789
49	E1	32	gapdh	1.78865	1.51582
49	E1	33	gapdh	1.79646	1.51785
49	E1	34	gapdh	1.80882	1.52444
49	E1	35	gapdh	1.82898	1.53882
49	E1	36	gapdh	1.85414	1.5582
49	E1	37	gapdh	1.88383	1.58213
[truncated: 1,883 more rows]

## Sheet: Results
Block Type	96-Well 0.2-mL Block
Calibration Background is expired	No
Calibration Background performed on	09-10-2018
Calibration Pure Dye ABY is expired	No
Calibration Pure Dye ABY performed on	09-10-2018
Calibration Pure Dye FAM is expired	No
Calibration Pure Dye FAM performed on	09-10-2018
Calibration Pure Dye JUN is expired	No
Calibration Pure Dye JUN performed on	09-10-2018
Calibration Pure Dye NED is expired	No
Calibration Pure Dye NED performed on	09-10-2018
Calibration Pure Dye ROX is expired	No
Calibration Pure Dye ROX performed on	09-10-2018
Calibration Pure Dye SYBR is expired	No
Calibration Pure Dye SYBR performed on	09-10-2018
Calibration Pure Dye TAMRA is expired	No
Calibration Pure Dye TAMRA performed on	09-10-2018
Calibration Pure Dye VIC is expired	No
Calibration Pure Dye VIC performed on	09-10-2018
Calibration ROI is expired	No
Calibration ROI performed on	09-10-2018
Calibration Uniformity is expired	No
Calibration Uniformity performed on	09-10-2018
Chemistry	SYBR_GREEN
Date Created	2021-10-21 14:55:04 PM CST
Experiment Barcode
Experiment Comment
Experiment File Name	E:\zyf\1AAA 实验相关\实验相关\实验数据\qPCR\2019-12-15_zyf 验证小干扰.eds
Experiment Name	2019-12-15_zyf
Experiment Run End Time	2019-12-15 13:10:59 PM CST
Experiment Type	Comparative Cт (ΔΔCт)
Instrument Name	272322851
Instrument Serial Number	272322851
Instrument Type	QuantStudio™ 3 System
Passive Reference	ROX
Post-read Stage/Step
Pre-read Stage/Step
Quantification Cycle Method	Ct
Signal Smoothing On	true
Stage where Melt Analysis is performed	Stage3
Stage/ Cycle where Ct Analysis is performed	Stage2, Step2
User Name
Well	Well Position	Omit	Sample Name	Target Name	Task	Reporter	Quencher	Quantity	Quantity Mean	Quantity SD	RQ	RQ Min	RQ Max	CT	Ct Mean	Ct SD	Delta Ct	Delta Ct Mean	Delta Ct SD	Delta Ct SE	Delta Delta Ct	Automatic Ct Threshold	Ct Threshold	Automatic Baseline	Baseline Start	Baseline End	Amp Status	Comments	Cq Conf	Tm1	Tm2	Tm3	Tm4
1	A1	FALSE	SCR	gapdh	UNKNOWN	SYBR	None							17.2838	17.3521	0.0591927						TRUE	0.192161	TRUE	3	12	Amp		0.926734	88.3889
2	A2	FALSE	SCR	gapdh	UNKNOWN	SYBR	None							17.3867	17.3521	0.0591927						TRUE	0.192161	TRUE	3	12	Amp		0.891944	88.5424
3	A3	FALSE	SCR	gapdh	UNKNOWN	SYBR	None							17.3858	17.3521	0.0591927						TRUE	0.192161	TRUE	3	12	Amp		0.916688	88.5396
4	A4	FALSE	SCR	adam8	UNKNOWN	SYBR	None				1	0.890278	1.12324	23.4536	23.4932	0.0862401		6.1411	0.1046	0.0603907	0	TRUE	0.167938	TRUE	3	19	Amp		0.959467	85.4708
5	A5	FALSE	SCR	adam8	UNKNOWN	SYBR	None				1	0.890278	1.12324	23.4339	23.4932	0.0862401		6.1411	0.1046	0.0603907	0	TRUE	0.167938	TRUE	3	18	Amp		0.954847	85.3414
6	A6	FALSE	SCR	adam8	UNKNOWN	SYBR	None				1	0.890278	1.12324	23.5921	23.4932	0.0862401		6.1411	0.1046	0.0603907	0	TRUE	0.167938	TRUE	3	19	Amp		0.956592	85.1879
25	C1	FALSE	si1	gapdh	UNKNOWN	SYBR	None							19.8526	19.7399	0.105568						TRUE	0.192161	TRUE	3	15	Amp		0.954207	86.3941
26	C2	FALSE	si1	gapdh	UNKNOWN	SYBR	None							19.724	19.7399	0.105568						TRUE	0.192161	TRUE	3	15	Amp		0.953817	86.701
27	C3	FALSE	si1	gapdh	UNKNOWN	SYBR	None							19.6432	19.7399	0.105568						TRUE	0.192161	TRUE	3	14	Amp		0.952096	85.7777
28	C4	FALSE	si1	adam8	UNKNOWN	SYBR	None				0.792903	0.680428	0.923971	26.1361	26.2158	0.0883846		6.47588	0.137683	0.079491	0.334783	TRUE	0.167938	TRUE	3	21	Amp		0.958863	85.3174
29	C5	FALSE	si1	adam8	UNKNOWN	SYBR	None				0.792903	0.680428	0.923971	26.2005	26.2158	0.0883846		6.47588	0.137683	0.079491	0.334783	TRUE	0.167938	TRUE	3	21	Amp		0.959885	85.0343
30	C6	FALSE	si1	adam8	UNKNOWN	SYBR	None				0.792903	0.680428	0.923971	26.3109	26.2158	0.0883846		6.47588	0.137683	0.079491	0.334783	TRUE	0.167938	TRUE	3	21	Amp		0.954181	85.0343
49	E1	FALSE	si2	gapdh	UNKNOWN	SYBR	None							17.7218	17.6814	0.0697138						TRUE	0.192161	TRUE	3	13	Amp		0.875743	88.082
50	E2	FALSE	si2	gapdh	UNKNOWN	SYBR	None							17.7215	17.6814	0.0697138						TRUE	0.192161	TRUE	3	13	Amp		0.886865	87.9286
51	E3	FALSE	si2	gapdh	UNKNOWN	SYBR	None							17.6009	17.6814	0.0697138						TRUE	0.192161	TRUE	3	11	Amp		0.92059	88.2327
52	E4	FALSE	si2	adam8	UNKNOWN	SYBR	None				0.39241	0.351016	0.438686	25.153	25.1721	0.072153		7.49067	0.10033	0.0579254	1.34957	TRUE	0.167938	TRUE	3	20	Amp		0.900724	85.0105
53	E5	FALSE	si2	adam8	UNKNOWN	SYBR	None				0.39241	0.351016	0.438686	25.1113	25.1721	0.072153		7.49067	0.10033	0.0579254	1.34957	TRUE	0.167938	TRUE	3	20	Amp		0.931199	85.0343
54	E6	FALSE	si2	adam8	UNKNOWN	SYBR	None				0.39241	0.351016	0.438686	25.2518	25.1721	0.072153		7.49067	0.10033	0.0579254	1.34957	TRUE	0.167938	TRUE	3	21	Amp		0.929332	85.0343
73	G1	FALSE	si3	gapdh	UNKNOWN	SYBR	None							18.0509	18.0492	0.0855241						TRUE	0.192161	TRUE	3	13	Amp		0.921731	87.7751
74	G2	FALSE	si3	gapdh	UNKNOWN	SYBR	None							17.9628	18.0492	0.0855241						TRUE	0.192161	TRUE	3	12	Amp		0.949369	87.7751
75	G3	FALSE	si3	gapdh	UNKNOWN	SYBR	None							18.1338	18.0492	0.0855241						TRUE	0.192161	TRUE	3	13	Amp		0.917381	88.2327
76	G4	FALSE	si3	adam8	UNKNOWN	SYBR	None				0.38867	0.3522	0.428917	25.5735	25.5536	0.0234432		7.50448	0.0886789	0.0511988	1.36338	TRUE	0.167938	TRUE	3	20	Amp		0.964391	85.3174
77	G5	FALSE	si3	adam8	UNKNOWN	SYBR	None				0.38867	0.3522	0.428917	25.5278	25.5536	0.0234432		7.50448	0.0886789	0.0511988	1.36338	TRUE	0.167938	TRUE	3	20	Amp		0.883613	85.3414
78	G6	FALSE	si3	adam8	UNKNOWN	SYBR	None				0.38867	0.3522	0.428917	25.5597	25.5536	0.0234432		7.50448	0.0886789	0.0511988	1.36338	TRUE	0.167938	TRUE	3	21	Amp		0.974448	85.1879
Analysis Type	Singleplex
Endogenous Control	gapdh
RQ Min/Max Confidence Level	95.0
Reference Sample	SCR

## Sheet: Melt Curve Raw Data
Block Type	96-Well 0.2-mL Block
Calibration Background is expired	No
Calibration Background performed on	09-10-2018
Calibration Pure Dye ABY is expired	No
Calibration Pure Dye ABY performed on	09-10-2018
Calibration Pure Dye FAM is expired	No
Calibration Pure Dye FAM performed on	09-10-2018
Calibration Pure Dye JUN is expired	No
Calibration Pure Dye JUN performed on	09-10-2018
Calibration Pure Dye NED is expired	No
Calibration Pure Dye NED performed on	09-10-2018
Calibration Pure Dye ROX is expired	No
Calibration Pure Dye ROX performed on	09-10-2018
Calibration Pure Dye SYBR is expired	No
Calibration Pure Dye SYBR performed on	09-10-2018
Calibration Pure Dye TAMRA is expired	No
Calibration Pure Dye TAMRA performed on	09-10-2018
Calibration Pure Dye VIC is expired	No
Calibration Pure Dye VIC performed on	09-10-2018
Calibration ROI is expired	No
Calibration ROI performed on	09-10-2018
Calibration Uniformity is expired	No
Calibration Uniformity performed on	09-10-2018
Chemistry	SYBR_GREEN
Date Created	2021-10-21 14:55:04 PM CST
Experiment Barcode
Experiment Comment
Experiment File Name	E:\zyf\1AAA 实验相关\实验相关\实验数据\qPCR\2019-12-15_zyf 验证小干扰.eds
Experiment Name	2019-12-15_zyf
Experiment Run End Time	2019-12-15 13:10:59 PM CST
Experiment Type	Comparative Cт (ΔΔCт)
Instrument Name	272322851
Instrument Serial Number	272322851
Instrument Type	QuantStudio™ 3 System
Passive Reference	ROX
Post-read Stage/Step
Pre-read Stage/Step
Quantification Cycle Method	Ct
Signal Smoothing On	true
Stage where Melt Analysis is performed	Stage3
Stage/ Cycle where Ct Analysis is performed	Stage2, Step2
User Name
Well	Well Position	Reading	Temperature	Fluorescence	Derivative	Target Name
1	A1	1	60.0005	583242	11119.3	gapdh
1	A1	2	60.3074	580732	11273.1	gapdh
1	A1	3	60.6143	577313	11414.7	gapdh
1	A1	4	60.9212	573476	11540.8	gapdh
1	A1	5	61.2281	570463	11659.4	gapdh
1	A1	6	61.535	567722	11782.3	gapdh
1	A1	7	61.8419	564513	11916	gapdh
1	A1	8	62.1488	558710	12056.8	gapdh
1	A1	9	62.4557	556550	12193.2	gapdh
1	A1	10	62.7626	552313	12312.4	gapdh
1	A1	11	63.0695	548357	12406.6	gapdh
1	A1	12	63.3764	544423	12477.5	gapdh
1	A1	13	63.6833	539555	12534.9	gapdh
1	A1	14	63.9902	536549	12595.4	gapdh
1	A1	15	64.2971	532829	12663.2	gapdh
1	A1	16	64.604	529054	12738.2	gapdh
1	A1	17	64.9109	523612	12815.1	gapdh
1	A1	18	65.2178	520012	12887.6	gapdh
1	A1	19	65.5247	516413	12949.6	gapdh
1	A1	20	65.8316	512197	12995.4	gapdh
1	A1	21	66.1385	507382	13019.8	gapdh
1	A1	22	66.4454	503504	13018.6	gapdh
1	A1	23	66.7523	499345	12991.9	gapdh
1	A1	24	67.0592	494979	12943.4	gapdh
1	A1	25	67.3661	491697	12879.6	gapdh
1	A1	26	67.673	487050	12809.4	gapdh
1	A1	27	67.98	482494	12743.3	gapdh
1	A1	28	68.2869	479576	12692	gapdh
1	A1	29	68.5938	475596	12662.8	gapdh
1	A1	30	68.9007	471026	12655.6	gapdh
1	A1	31	69.2076	467986	12660.6	gapdh
1	A1	32	69.5145	463418	12660.6	gapdh
1	A1	33	69.8214	459611	12638.2	gapdh
1	A1	34	70.1283	455360	12583.7	gapdh
1	A1	35	70.4352	451150	12504.4	gapdh
1	A1	36	70.7421	446177	12417.2	gapdh
1	A1	37	71.049	444503	12336.4	gapdh
1	A1	38	71.3559	439893	12274.9	gapdh
1	A1	39	71.6628	435603	12236.2	gapdh
1	A1	40	71.9697	432716	12217.2	gapdh
1	A1	41	72.2766	427676	12213.1	gapdh
1	A1	42	72.5835	424808	12221.8	gapdh
1	A1	43	72.8904	421848	12243.1	gapdh
1	A1	44	73.1973	416855	12278.5	gapdh
1	A1	45	73.5042	413286	12331.3	gapdh
1	A1	46	73.8111	409287	12408.4	gapdh
1	A1	47	74.118	406176	12516.8	gapdh
1	A1	48	74.4249	401776	12668.7	gapdh
1	A1	49	74.7318	398451	12845.6	gapdh
1	A1	50	75.0387	394025	13016.2	gapdh
1	A1	51	75.3456	390769	13144.8	gapdh
1	A1	52	75.6525	385271	13201.6	gapdh
1	A1	53	75.9594	380671	13175.3	gapdh
1	A1	54	76.2663	378222	13075.1	gapdh
1	A1	55	76.5732	373045	12925.2	gapdh
1	A1	56	76.8801	369373	12754.7	gapdh
1	A1	57	77.187	365195	12588.2	gapdh
1	A1	58	77.4939	361523	12451	gapdh
1	A1	59	77.8008	357632	12342.7	gapdh
1	A1	60	78.1077	354016	12255.7	gapdh
1	A1	61	78.4146	350579	12181	gapdh
1	A1	62	78.7215	345456	12108.7	gapdh
1	A1	63	79.0284	342558	12034.4	gapdh
1	A1	64	79.3353	338733	11962.3	gapdh
1	A1	65	79.6422	334842	11902.4	gapdh
1	A1	66	79.9491	331268	11864.8	gapdh
1	A1	67	80.256	328310	11853.4	gapdh
1	A1	68	80.5629	324132	11864.6	gapdh
1	A1	69	80.8699	320431	11890.3	gapdh
1	A1	70	81.1768	317039	11924.7	gapdh
1	A1	71	81.4837	312587	11968.6	gapdh
1	A1	72	81.7906	309201	12030.4	gapdh
1	A1	73	82.0975	306795	12121.9	gapdh
1	A1	74	82.4044	301466	12255.4	gapdh
1	A1	75	82.7113	298002	12441.9	gapdh
1	A1	76	83.0182	294670	12708.5	gapdh
1	A1	77	83.3251	290544	13074	gapdh
1	A1	78	83.632	286743	13553.3	gapdh
1	A1	79	83.9389	281797	14185	gapdh
1	A1	80	84.2458	279081	15034.8	gapdh
1	A1	81	84.5527	273862	16215.7	gapdh
1	A1	82	84.8596	267839	17898.6	gapdh
1	A1	83	85.1665	262411	20295.8	gapdh
1	A1	84	85.4734	256127	23606.8	gapdh
1	A1	85	85.7803	248057	27940	gapdh
1	A1	86	86.0872	239030	33252.2	gapdh
1	A1	87	86.3941	224578	39340.9	gapdh
1	A1	88	86.701	210026	45897.1	gapdh
1	A1	89	87.0079	190318	52578.2	gapdh
1	A1	90	87.3148	172755	59040	gapdh
1	A1	91	87.6217	152401	64892.3	gapdh
1	A1	92	87.9286	129655	69605.4	gapdh
1	A1	93	88.2355	105808	72460.4	gapdh
1	A1	94	88.5424	75471	72641.2	gapdh
1	A1	95	88.8493	43394.7	69499.5	gapdh
1	A1	96	89.1562	19657.4	62888	gapdh
1	A1	97	89.4631	10295.1	53375.6	gapdh
1	A1	98	89.77	7293.48	42184.7	gapdh
1	A1	99	90.0769	7350.87	30846.3	gapdh
1	A1	100	90.3838	6848.9	20735.8	gapdh
1	A1	101	90.6907	6875.22	12714.3	gapdh
1	A1	102	90.9976	7170.61	7501.99	gapdh
1	A1	103	91.3045	6726.4	4185.21	gapdh
1	A1	104	91.6114	6675.96	2275.69	gapdh
1	A1	105	91.9183	6416.11	1274.72	gapdh
1	A1	106	92.2252	6357.2	781.373	gapdh
1	A1	107	92.5321	6425.86	525.877	gapdh
1	A1	108	92.839	6042.17	343.916	gapdh
1	A1	109	93.1459	6626.61	129.565	gapdh
1	A1	110	93.4528	6602.56	-203.402	gapdh
1	A1	111	93.7597	5996.65	-734.865	gapdh
1	A1	112	94.0666	5758.52	-1523.97	gapdh
1	A1	113	94.3735	5905.54	-2580.89	gapdh
1	A1	114	94.6805	5702.04	-3849.14	gapdh
2	A2	1	60.0005	771157	14106.5	gapdh
2	A2	2	60.3074	767925	14362.8	gapdh
2	A2	3	60.6143	763774	14635.9	gapdh
2	A2	4	60.9212	761615	14903	gapdh
2	A2	5	61.2281	755504	15146.4	gapdh
2	A2	6	61.535	750403	15358.9	gapdh
2	A2	7	61.8419	746422	15541.2	gapdh
2	A2	8	62.1488	741731	15697.4	gapdh
2	A2	9	62.4557	736012	15830.5	gapdh
2	A2	10	62.7626	731072	15943.4	gapdh
2	A2	11	63.0695	725918	16041.8	gapdh
2	A2	12	63.3764	721671	16134.8	gapdh
2	A2	13	63.6833	714944	16230.7	gapdh
2	A2	14	63.9902	711254	16331.1	gapdh
2	A2	15	64.2971	705905	16427.8	gapdh
2	A2	16	64.604	700370	16503	gapdh
2	A2	17	64.9109	695687	16542.2	gapdh
2	A2	18	65.2178	688002	16543.4	gapdh
2	A2	19	65.5247	684354	16518.2	gapdh
2	A2	20	65.8316	678599	16487.1	gapdh
2	A2	21	66.1385	674122	16465.8	gapdh
2	A2	22	66.4454	667962	16459.3	gapdh
2	A2	23	66.7523	662894	16461.2	gapdh
2	A2	24	67.0592	657964	16458.9	gapdh
2	A2	25	67.3661	652583	16442.2	gapdh
2	A2	26	67.673	647451	16410	gapdh
2	A2	27	67.98	641510	16373.6	gapdh
2	A2	28	68.2869	636913	16352.8	gapdh
2	A2	29	68.5938	632018	16365.6	gapdh
2	A2	30	68.9007	626713	16414.4	gapdh
2	A2	31	69.2076	623107	16480.7	gapdh
2	A2	32	69.5145	616576	16529.9	gapdh
2	A2	33	69.8214	610489	16528.5	gapdh
2	A2	34	70.1283	605572	16459.8	gapdh
2	A2	35	70.4352	600015	16332.2	gapdh
2	A2	36	70.7421	594702	16174.9	gapdh
2	A2	37	71.049	590879	16022.5	gapdh
2	A2	38	71.3559	584584	15908.6	gapdh
2	A2	39	71.6628	580336	15856.8	gapdh
2	A2	40	71.9697	575176	15874	gapdh
2	A2	41	72.2766	571466	15944.4	gapdh
2	A2	42	72.5835	566240	16028.8	gapdh
2	A2	43	72.8904	561450	16076.4	gapdh
2	A2	44	73.1973	554645	16049.9	gapdh
2	A2	45	73.5042	549743	15949.5	gapdh
2	A2	46	73.8111	544722	15823.4	gapdh
2	A2	47	74.118	540626	15751.9	gapdh
2	A2	48	74.4249	536090	15814.2	gapdh
2	A2	49	74.7318	532273	16050.6	gapdh
2	A2	50	75.0387	527152	16442.8	gapdh
2	A2	51	75.3456	521899	16915.3	gapdh
2	A2	52	75.6525	516659	17353.9	gapdh
2	A2	53	75.9594	510579	17651.5	gapdh
2	A2	54	76.2663	503637	17742.5	gapdh
2	A2	55	76.5732	496923	17624.3	gapdh
2	A2	56	76.8801	492488	17352.8	gapdh
2	A2	57	77.187	487169	17017.3	gapdh
2	A2	58	77.4939	482386	16705.3	gapdh
2	A2	59	77.8008	477099	16474.5	gapdh
2	A2	60	78.1077	472256	16342	gapdh
2	A2	61	78.4146	467253	16291.1	gapdh
2	A2	62	78.7215	462130	16284.8	gapdh
2	A2	63	79.0284	456604	16286.1	gapdh
2	A2	64	79.3353	451308	16270.4	gapdh
2	A2	65	79.6422	445872	16230.5	gapdh
2	A2	66	79.9491	441708	16173.8	gapdh
2	A2	67	80.256	436500	16115.4	gapdh
2	A2	68	80.5629	431018	16069.2	gapdh
2	A2	69	80.8699	426956	16044.8	gapdh
2	A2	70	81.1768	421598	16047.5	gapdh
2	A2	71	81.4837	416026	16080.8	gapdh
2	A2	72	81.7906	411617	16148.8	gapdh
2	A2	73	82.0975	407378	16259.1	gapdh
2	A2	74	82.4044	401346	16426.9	gapdh
2	A2	75	82.7113	395607	16678	gapdh
2	A2	76	83.0182	391513	17048	gapdh
2	A2	77	83.3251	386359	17577.7	gapdh
2	A2	78	83.632	381206	18303.6	gapdh
2	A2	79	83.9389	375868	19259.7	gapdh
2	A2	80	84.2458	369659	20497	gapdh
2	A2	81	84.5527	362402	22113.2	gapdh
2	A2	82	84.8596	354992	24268.9	gapdh
2	A2	83	85.1665	347188	27161.3	gapdh
2	A2	84	85.4734	337942	30955.6	gapdh
2	A2	85	85.7803	326054	35705.1	gapdh
2	A2	86	86.0872	312124	41315.7	gapdh
2	A2	87	86.3941	295106	47585.6	gapdh
2	A2	88	86.701	275256	54299.2	gapdh
2	A2	89	87.0079	253640	61301.5	gapdh
2	A2	90	87.3148	232681	68471.4	gapdh
2	A2	91	87.6217	209776	75568.4	gapdh
2	A2	92	87.9286	182996	82026.3	gapdh
2	A2	93	88.2355	150990	86846.4	gapdh
2	A2	94	88.5424	108698	88740.7	gapdh
2	A2	95	88.8493	62885.1	86549.3	gapdh
2	A2	96	89.1562	29666.5	79769.1	gapdh
2	A2	97	89.4631	15522.9	68909.4	gapdh
2	A2	98	89.77	10725.4	55445.7	gapdh
2	A2	99	90.0769	9672.17	41364.7	gapdh
2	A2	100	90.3838	9989.57	28528.2	gapdh
2	A2	101	90.6907	9700.5	18165.8	gapdh
2	A2	102	90.9976	10016.7	10744.8	gapdh
2	A2	103	91.3045	9712.9	5954.19	gapdh
2	A2	104	91.6114	9648.34	3166.27	gapdh
2	A2	105	91.9183	9172.29	1705.33	gapdh
2	A2	106	92.2252	9801.49	1011.54	gapdh
2	A2	107	92.5321	9368.12	694.244	gapdh
2	A2	108	92.839	8904.81	500.575	gapdh
2	A2	109	93.1459	9777.61	254.961	gapdh
2	A2	110	93.4528	8356.18	-187.662	gapdh
2	A2	111	93.7597	9085.51	-953.072	gapdh
2	A2	112	94.0666	8208.74	-2123.79	gapdh
2	A2	113	94.3735	7512.87	-3701.32	gapdh
2	A2	114	94.6805	8718.5	-5587.63	gapdh
3	A3	1	60.0002	814141	15093.2	gapdh
3	A3	2	60.3071	810267	15383.1	gapdh
3	A3	3	60.6139	806508	15703.4	gapdh
3	A3	4	60.9208	802168	16033.7	gapdh
3	A3	5	61.2277	798163	16351.2	gapdh
3	A3	6	61.5346	793943	16635.8	gapdh
3	A3	7	61.8414	786740	16876.6	gapdh
3	A3	8	62.1483	782072	17074.1	gapdh
3	A3	9	62.4552	776826	17239.3	gapdh
3	A3	10	62.7621	771016	17387.5	gapdh
3	A3	11	63.0689	766081	17531.6	gapdh
3	A3	12	63.3758	760349	17677.8	gapdh
3	A3	13	63.6827	754118	17842	gapdh
3	A3	14	63.9896	750324	17999.1	gapdh
3	A3	15	64.2964	743111	18127.3	gapdh
3	A3	16	64.6033	737697	18212.5	gapdh
3	A3	17	64.9102	731779	18246.9	gapdh
3	A3	18	65.2171	725757	18232.3	gapdh
3	A3	19	65.5239	720110	18178.9	gapdh
3	A3	20	65.8308	713710	18101.8	gapdh
3	A3	21	66.1377	708713	18017.4	gapdh
3	A3	22	66.4446	702143	17938.9	gapdh
3	A3	23	66.7514	697335	17873.7	gapdh
3	A3	24	67.0583	691014	17822.5	gapdh
3	A3	25	67.3652	686191	17781.3	gapdh
3	A3	26	67.6721	679934	17745.5	gapdh
3	A3	27	67.9789	674404	17713	gapdh
3	A3	28	68.2858	669450	17688.9	gapdh
3	A3	29	68.5927	663320	17671.6	gapdh
3	A3	30	68.8996	658741	17661.1	gapdh
3	A3	31	69.2064	652369	17653.3	gapdh
3	A3	32	69.5133	647382	17639.7	gapdh
3	A3	33	69.8202	641834	17610.4	gapdh
3	A3	34	70.1271	635313	17559	gapdh
3	A3	35	70.4339	630177	17485.2	gapdh
3	A3	36	70.7408	624861	17395.9	gapdh
3	A3	37	71.0477	618565	17303.2	gapdh
3	A3	38	71.3546	614060	17219.2	gapdh
3	A3	39	71.6614	608755	17152.6	gapdh
3	A3	40	71.9683	603028	17104.9	gapdh
3	A3	41	72.2752	598589	17071.6	gapdh
3	A3	42	72.5821	592972	17044.2	gapdh
3	A3	43	72.8889	586876	17016	gapdh
3	A3	44	73.1958	583521	16988	gapdh
3	A3	45	73.5027	576750	16973.7	gapdh
3	A3	46	73.8096	570980	17000.3	gapdh
3	A3	47	74.1164	567081	17103	gapdh
3	A3	48	74.4233	562086	17312.8	gapdh
3	A3	49	74.7302	556238	17641.7	gapdh
3	A3	50	75.0371	551794	18131	gapdh
3	A3	51	75.3439	545201	18687.3	gapdh
3	A3	52	75.6508	540852	19210	gapdh
3	A3	53	75.9577	533597	19607.4	gapdh
3	A3	54	76.2646	526608	19814.1	gapdh
3	A3	55	76.5714	519521	19812.8	gapdh
3	A3	56	76.8783	513837	19636.1	gapdh
3	A3	57	77.1852	508403	19349.5	gapdh
3	A3	58	77.4921	502833	19023.7	gapdh
3	A3	59	77.7989	495390	18713.8	gapdh
3	A3	60	78.1058	491018	18449.4	gapdh
3	A3	61	78.4127	485758	18237.1	gapdh
3	A3	62	78.7196	479358	18068.1	gapdh
3	A3	63	79.0264	474034	17928.8	gapdh
3	A3	64	79.3333	468059	17808.5	gapdh
3	A3	65	79.6402	462613	17705.1	gapdh
3	A3	66	79.9471	457800	17631.6	gapdh
3	A3	67	80.2539	452239	17577.6	gapdh
3	A3	68	80.5608	446689	17543.5	gapdh
3	A3	69	80.8677	440753	17526.1	gapdh
3	A3	70	81.1746	436978	17520.7	gapdh
3	A3	71	81.4814	429957	17524.5	gapdh
3	A3	72	81.7883	424952	17540.4	gapdh
3	A3	73	82.0952	419711	17579.9	gapdh
3	A3	74	82.4021	414517	17664.5	gapdh
3	A3	75	82.7089	408488	17842.5	gapdh
3	A3	76	83.0158	403436	18152.9	gapdh
3	A3	77	83.3227	398276	18621	gapdh
3	A3	78	83.6296	393051	19272.1	gapdh
3	A3	79	83.9364	386520	20136.1	gapdh
3	A3	80	84.2433	381491	21277.8	gapdh
3	A3	81	84.5502	373366	22838.2	gapdh
3	A3	82	84.8571	366942	25058.6	gapdh
3	A3	83	85.1639	358851	28256.4	gapdh
3	A3	84	85.4708	350210	32740.3	gapdh
3	A3	85	85.7777	339672	38694.4	gapdh
3	A3	86	86.0846	326686	46083.8	gapdh
3	A3	87	86.3914	309758	54637	gapdh
3	A3	88	86.6983	288982	63913.3	gapdh
3	A3	89	87.0052	264481	73411.4	gapdh
3	A3	90	87.3121	238602	82641.4	gapdh
3	A3	91	87.6189	211183	91097	gapdh
3	A3	92	87.9258	182152	98134.2	gapdh
3	A3	93	88.2327	151654	102855	gapdh
3	A3	94	88.5396	114147	104145	gapdh
3	A3	95	88.8464	69427.8	100967	gapdh
3	A3	96	89.1533	32383.5	92831.9	gapdh
3	A3	97	89.4602	14287.2	80201.3	gapdh
3	A3	98	89.7671	8086.62	64560	gapdh
3	A3	99	90.0739	7882.59	48039.2	gapdh
3	A3	100	90.3808	7543.23	32763.5	gapdh
3	A3	101	90.6877	7404.57	20244.4	gapdh
3	A3	102	90.9946	7750.27	12046.3	gapdh
3	A3	103	91.3014	7058.08	6918.56	gapdh
3	A3	104	91.6083	6997.52	3904.31	gapdh
3	A3	105	91.9152	6172.38	2303.45	gapdh
3	A3	106	92.2221	6107.41	1514.61	gapdh
3	A3	107	92.5289	6447.97	1108.61	gapdh
3	A3	108	92.8358	6023.54	803.209	gapdh
3	A3	109	93.1427	5516.57	400.07	gapdh
3	A3	110	93.4496	5583.34	-263.992	gapdh
3	A3	111	93.7564	4781.7	-1324.39	gapdh
3	A3	112	94.0633	5301	-2857.65	gapdh
3	A3	113	94.3702	5598.67	-4840.5	gapdh
3	A3	114	94.6771	5418.55	-7137.33	gapdh
4	A4	1	60.0002	687036	15275.1	adam8
4	A4	2	60.3071	684501	15495.6	adam8
4	A4	3	60.6139	680314	15744	adam8
4	A4	4	60.9208	675071	16001.9	adam8
4	A4	5	61.2277	671665	16252	adam8
4	A4	6	61.5346	666250	16520.6	adam8
4	A4	7	61.8414	660878	16756.1	adam8
4	A4	8	62.1483	655052	16954.7	adam8
4	A4	9	62.4552	649989	17116.9	adam8
4	A4	10	62.7621	644894	17248.4	adam8
4	A4	11	63.0689	638248	17357.5	adam8
4	A4	12	63.3758	633459	17452.5	adam8
4	A4	13	63.6827	628339	17537.9	adam8
4	A4	14	63.9896	622404	17611.9	adam8
4	A4	15	64.2964	616661	17667.9	adam8
4	A4	16	64.6033	611261	17697.3	adam8
4	A4	17	64.9102	606159	17694.6	adam8
4	A4	18	65.2171	598205	17658.5	adam8
4	A4	19	65.5239	594449	17590.7	adam8
4	A4	20	65.8308	588724	17493.8	adam8
4	A4	21	66.1377	582226	17370.8	adam8
4	A4	22	66.4446	576730	17228.4	adam8
4	A4	23	66.7514	570847	17079.4	adam8
4	A4	24	67.0583	566836	16942.7	adam8
4	A4	25	67.3652	560184	16839.1	adam8
4	A4	26	67.6721	555264	16785.6	adam8
4	A4	27	67.9789	550246	16788.2	adam8
4	A4	28	68.2858	544995	16835.9	adam8
4	A4	29	68.5927	540346	16899.6	adam8
4	A4	30	68.8996	534449	16939.5	adam8
4	A4	31	69.2064	528956	16920.1	adam8
4	A4	32	69.5133	523086	16825.5	adam8
4	A4	33	69.8202	517435	16667	adam8
4	A4	34	70.1271	512652	16475.8	adam8
4	A4	35	70.4339	507160	16287.6	adam8
4	A4	36	70.7408	502308	16144.1	adam8
4	A4	37	71.0477	496741	16031.3	adam8
4	A4	38	71.3546	492702	15933.4	adam8
4	A4	39	71.6614	486376	15837	adam8
4	A4	40	71.9683	482180	15735.9	adam8
4	A4	41	72.2752	476243	15635	adam8
4	A4	42	72.5821	472707	15546.1	adam8
4	A4	43	72.8889	467929	15479.4	adam8
4	A4	44	73.1958	462743	15440.4	adam8
4	A4	45	73.5027	457791	15432.5	adam8
4	A4	46	73.8096	452403	15464.9	adam8
4	A4	47	74.1164	448336	15556	adam8
4	A4	48	74.4233	443309	15725	adam8
4	A4	49	74.7302	438672	15978.5	adam8
4	A4	50	75.0371	433833	16303.2	adam8
4	A4	51	75.3439	429469	16688.9	adam8
4	A4	52	75.6508	423133	17008.3	adam8
4	A4	53	75.9577	417450	17186.5	adam8
4	A4	54	76.2646	411268	17183.3	adam8
4	A4	55	76.5714	405694	17008.4	adam8
4	A4	56	76.8783	400315	16715	adam8
4	A4	57	77.1852	395441	16376.1	adam8
4	A4	58	77.4921	390791	16084.9	adam8
4	A4	59	77.7989	385514	15859.1	adam8
4	A4	60	78.1058	380402	15684	adam8
4	A4	61	78.4127	375977	15543.2	adam8
4	A4	62	78.7196	370668	15415.3	adam8
4	A4	63	79.0264	365730	15287.8	adam8
4	A4	64	79.3333	360064	15162.5	adam8
4	A4	65	79.6402	356267	15053	adam8
4	A4	66	79.9471	352027	14973.4	adam8
4	A4	67	80.2539	347321	14933.3	adam8
4	A4	68	80.5608	342456	14941.5	adam8
4	A4	69	80.8677	336999	15021.2	adam8
4	A4	70	81.1746	332520	15227	adam8
4	A4	71	81.4814	328445	15654.2	adam8
4	A4	72	81.7883	324602	16471.3	adam8
4	A4	73	82.0952	319014	18018.3	adam8
4	A4	74	82.4021	314299	20461.9	adam8
4	A4	75	82.7089	307800	24131.6	adam8
4	A4	76	83.0158	302394	29392.7	adam8
4	A4	77	83.3227	294924	36560.1	adam8
4	A4	78	83.6296	285742	45747.8	adam8
4	A4	79	83.9364	274751	56691.4	adam8
4	A4	80	84.2433	259315	68625.3	adam8
4	A4	81	84.5502	237562	80296.5	adam8
4	A4	82	84.8571	202509	90147.5	adam8
4	A4	83	85.1639	159982	96627.3	adam8
4	A4	84	85.4708	114675	98536.1	adam8
4	A4	85	85.7777	75968.6	95312	adam8
4	A4	86	86.0846	47133.3	87197.3	adam8
4	A4	87	86.3914	29123.5	75232.6	adam8
4	A4	88	86.6983	20610.7	61053.5	adam8
4	A4	89	87.0052	16232.4	46509.3	adam8
4	A4	90	87.3121	14528.7	33221.3	adam8
4	A4	91	87.6189	11953.8	22242.4	adam8
4	A4	92	87.9258	11190.4	14277.1	adam8
4	A4	93	88.2327	9502.01	9305.3	adam8
4	A4	94	88.5396	8890.63	6026.56	adam8
4	A4	95	88.8464	8042.71	3946.09	adam8
4	A4	96	89.1533	8375.69	2645.19	adam8
4	A4	97	89.4602	7361.75	1829.19	adam8
4	A4	98	89.7671	7295.98	1314.7	adam8
4	A4	99	90.0739	7513.36	992.902	adam8
4	A4	100	90.3808	7100.91	795.046	adam8
4	A4	101	90.6877	6445.85	671.154	adam8
4	A4	102	90.9946	6842.58	582.669	adam8
4	A4	103	91.3014	5511.2	503.672	adam8
4	A4	104	91.6083	6042.69	423.2	adam8
4	A4	105	91.9152	6039.06	342.877	adam8
4	A4	106	92.2221	6173.94	269.171	adam8
4	A4	107	92.5289	5623.34	205.189	adam8
4	A4	108	92.8358	5175.42	147.868	adam8
4	A4	109	93.1427	5477.27	91.7666	adam8
4	A4	110	93.4496	5595.54	34.7373	adam8
4	A4	111	93.7564	5260.06	-20.4062	adam8
4	A4	112	94.0633	5960.66	-69.5439	adam8
4	A4	113	94.3702	5224.23	-112.101	adam8
4	A4	114	94.6771	5062.2	-152.356	adam8
5	A5	1	60.0002	623294	14558.6	adam8
5	A5	2	60.3074	620318	14720	adam8
5	A5	3	60.6145	616160	14890.8	adam8
5	A5	4	60.9217	613025	15066.8	adam8
5	A5	5	61.2289	607318	15207.3	adam8
5	A5	6	61.536	602520	15297.8	adam8
5	A5	7	61.8432	598529	15351.4	adam8
5	A5	8	62.1504	593053	15383.3	adam8
5	A5	9	62.4575	588536	15404.8	adam8
5	A5	10	62.7647	583740	15423.1	adam8
5	A5	11	63.0719	577969	15445.1	adam8
5	A5	12	63.379	573642	15477.4	adam8
5	A5	13	63.6862	568605	15520.1	adam8
5	A5	14	63.9934	564549	15562.7	adam8
5	A5	15	64.3005	559196	15585.8	adam8
5	A5	16	64.6077	553928	15572.7	adam8
5	A5	17	64.9149	548442	15520.3	adam8
5	A5	18	65.222	543394	15441.7	adam8
5	A5	19	65.5292	538945	15356.5	adam8
5	A5	20	65.8364	533938	15279.2	adam8
5	A5	21	66.1435	529452	15214.1	adam8
5	A5	22	66.4507	523948	15158.1	adam8
5	A5	23	66.7579	518177	15108.3	adam8
5	A5	24	67.065	514865	15064.1	adam8
5	A5	25	67.3722	509795	15025.3	adam8
5	A5	26	67.6794	505260	14991.1	adam8
5	A5	27	67.9865	499468	14962.1	adam8
5	A5	28	68.2937	495031	14942.9	adam8
5	A5	29	68.6009	490575	14938.8	adam8
5	A5	30	68.908	486610	14945.8	adam8
5	A5	31	69.2152	481784	14950.3	adam8
5	A5	32	69.5224	475931	14932	adam8
5	A5	33	69.8295	471578	14883.2	adam8
5	A5	34	70.1367	466420	14806	adam8
5	A5	35	70.4439	461756	14724.6	adam8
5	A5	36	70.751	457088	14677	adam8
5	A5	37	71.0582	452501	14704.6	adam8
5	A5	38	71.3654	448695	14836.9	adam8
5	A5	39	71.6725	443525	15113.5	adam8
5	A5	40	71.9797	439295	15518.6	adam8
5	A5	41	72.2869	435015	15952.8	adam8
5	A5	42	72.594	429193	16321.8	adam8
5	A5	43	72.9012	423426	16540.5	adam8
5	A5	44	73.2084	417400	16563.6	adam8
5	A5	45	73.5155	412603	16400.7	adam8
5	A5	46	73.8227	407331	16109	adam8
5	A5	47	74.1299	403011	15765.8	adam8
5	A5	48	74.437	398733	15438.8	adam8
5	A5	49	74.7442	393180	15165.7	adam8
5	A5	50	75.0514	389258	14951.2	adam8
5	A5	51	75.3585	384830	14810.3	adam8
5	A5	52	75.6657	379854	14684.4	adam8
5	A5	53	75.9729	374920	14556.6	adam8
5	A5	54	76.28	371039	14422.4	adam8
5	A5	55	76.5872	366101	14286.8	adam8
5	A5	56	76.8944	361471	14159.8	adam8
5	A5	57	77.2015	357628	14050.5	adam8
5	A5	58	77.5087	352465	13961.4	adam8
5	A5	59	77.8159	349070	13888.3	adam8
5	A5	60	78.123	343528	13821.6	adam8
5	A5	61	78.4302	339885	13751.8	adam8
5	A5	62	78.7374	334947	13675	adam8
5	A5	63	79.0445	330996	13595	adam8
5	A5	64	79.3517	326285	13523.2	adam8
5	A5	65	79.6589	322786	13474.7	adam8
5	A5	66	79.966	318039	13463.5	adam8
5	A5	67	80.2732	314344	13501.2	adam8
5	A5	68	80.5804	310256	13599.8	adam8
5	A5	69	80.8875	305540	13780.2	adam8
5	A5	70	81.1947	301578	14085.6	adam8
5	A5	71	81.5019	296831	14594.6	adam8
5	A5	72	81.809	292700	15556.9	adam8
5	A5	73	82.1162	288578	17243.7	adam8
5	A5	74	82.4234	283735	19861.8	adam8
5	A5	75	82.7305	278196	23760.6	adam8
5	A5	76	83.0377	271932	29297.8	adam8
5	A5	77	83.3449	264676	36739.3	adam8
5	A5	78	83.652	255744	46106.1	adam8
5	A5	79	83.9592	243941	57011.2	adam8
5	A5	80	84.2664	228134	68568.4	adam8
5	A5	81	84.5735	203276	79456.3	adam8
5	A5	82	84.8807	168765	88152.7	adam8
5	A5	83	85.1879	129869	93270.5	adam8
5	A5	84	85.495	91899.3	93875.6	adam8
5	A5	85	85.8022	60208.9	89691.6	adam8
5	A5	86	86.1094	37383.6	81158.1	adam8
5	A5	87	86.4165	22599.6	69351.8	adam8
5	A5	88	86.7237	15813.8	55777.9	adam8
5	A5	89	87.0309	12215.8	42059.3	adam8
5	A5	90	87.338	10541.3	29594.6	adam8
5	A5	91	87.6452	8796.94	19295.1	adam8
5	A5	92	87.9524	8522.11	12186.4	adam8
5	A5	93	88.2595	7640.47	7824.19	adam8
5	A5	94	88.5667	6754.17	4976.58	adam8
5	A5	95	88.8739	7080.34	3220.37	adam8
5	A5	96	89.181	6046.17	2179.74	adam8
5	A5	97	89.4882	5877.31	1575.52	adam8
5	A5	98	89.7953	6064.54	1225.19	adam8
5	A5	99	90.1025	5141.27	1019.19	adam8
5	A5	100	90.4097	5494.47	893.594	adam8
5	A5	101	90.7169	4939.08	809.797	adam8
5	A5	102	91.024	4528.26	743.384	adam8
5	A5	103	91.3312	4115.94	679.38	adam8
5	A5	104	91.6384	4801.87	610.01	adam8
5	A5	105	91.9455	4006.72	532.796	adam8
5	A5	106	92.2527	3431.13	449.048	adam8
5	A5	107	92.5599	3990.16	363.074	adam8
5	A5	108	92.867	3659.2	280.809	adam8
5	A5	109	93.1742	4222.82	206.443	adam8
5	A5	110	93.4814	3942.55	138.398	adam8
5	A5	111	93.7885	2948.03	68.6992	adam8
5	A5	112	94.0957	3311.36	-12	adam8
5	A5	113	94.4028	3659.11	-107.054	adam8
5	A5	114	94.71	4349.8	-210.634	adam8
6	A6	1	60.0002	560968	12949.2	adam8
6	A6	2	60.3074	558932	13111.2	adam8
6	A6	3	60.6145	555168	13292.2	adam8
6	A6	4	60.9217	551434	13470.1	adam8
6	A6	5	61.2289	547046	13638.7	adam8
6	A6	6	61.536	543312	13772.5	adam8
6	A6	7	61.8432	539282	13868.3	adam8
6	A6	8	62.1504	533505	13930	adam8
6	A6	9	62.4575	529753	13966.4	adam8
6	A6	10	62.7647	525016	13990.8	adam8
6	A6	11	63.0719	520696	14015.9	adam8
6	A6	12	63.379	516057	14050.8	adam8
6	A6	13	63.6862	511679	14096.8	adam8
6	A6	14	63.9934	507342	14147	adam8
6	A6	15	64.3005	503024	14189.5	adam8
6	A6	16	64.6077	497969	14212.2	adam8
6	A6	17	64.9149	493024	14208.7	adam8
6	A6	18	65.222	488503	14179.1	adam8
6	A6	19	65.5292	484329	14128.4	adam8
6	A6	20	65.8364	479221	14064.9	adam8
6	A6	21	66.1435	474789	13998.9	adam8
6	A6	22	66.4507	470051	13941.2	adam8
6	A6	23	66.7579	465309	13899.6	adam8
6	A6	24	67.065	461650	13874.7	adam8
6	A6	25	67.3722	457687	13858.2	adam8
6	A6	26	67.6794	451964	13838.6	adam8
6	A6	27	67.9865	447614	13809.3	adam8
6	A6	28	68.2937	443487	13773.3	adam8
6	A6	29	68.6009	439239	13738.1	adam8
6	A6	30	68.908	435082	13707.2	adam8
6	A6	31	69.2152	430857	13673.2	adam8
6	A6	32	69.5224	426507	13621.6	adam8
6	A6	33	69.8295	420991	13540.9	adam8
6	A6	34	70.1367	416976	13434.9	adam8
6	A6	35	70.4439	412681	13320.5	adam8
6	A6	36	70.751	408792	13208.9	adam8
6	A6	37	71.0582	404307	13111.7	adam8
6	A6	38	71.3654	400400	13031.4	adam8
6	A6	39	71.6725	396145	12965.4	adam8
6	A6	40	71.9797	391976	12911.7	adam8
6	A6	41	72.2869	387588	12871.5	adam8
6	A6	42	72.594	384325	12846.8	adam8
6	A6	43	72.9012	380425	12836.3	adam8
6	A6	44	73.2084	375975	12836.6	adam8
6	A6	45	73.5155	372026	12850.3	adam8
6	A6	46	73.8227	366760	12895.7	adam8
6	A6	47	74.1299	363655	13005.7	adam8
6	A6	48	74.437	359895	13211.6	adam8
6	A6	49	74.7442	356383	13521.3	adam8
6	A6	50	75.0514	352422	13916.6	adam8
6	A6	51	75.3585	347711	14289.4	adam8
6	A6	52	75.6657	341884	14540.9	adam8
6	A6	53	75.9729	336717	14602.2	adam8
6	A6	54	76.28	331592	14464.2	adam8
6	A6	55	76.5872	326990	14177.1	adam8
6	A6	56	76.8944	323479	13824.9	adam8
6	A6	57	77.2015	319538	13487.3	adam8
6	A6	58	77.5087	315129	13233.6	adam8
6	A6	59	77.8159	310743	13054.6	adam8
6	A6	60	78.123	306568	12939.6	adam8
6	A6	61	78.4302	302897	12869.6	adam8
6	A6	62	78.7374	298362	12824	adam8
6	A6	63	79.0445	295005	12783.9	adam8
6	A6	64	79.3517	290039	12732.6	adam8
6	A6	65	79.6589	286118	12661.2	adam8
6	A6	66	79.966	282073	12575	adam8
6	A6	67	80.2732	278127	12499	adam8
6	A6	68	80.5804	274413	12478.9	adam8
6	A6	69	80.8875	271277	12579.2	adam8
6	A6	70	81.1947	266692	12881.7	adam8
6	A6	71	81.5019	263158	13488.7	adam8
6	A6	72	81.809	259532	14610	adam8
6	A6	73	82.1162	255538	16380.9	adam8
6	A6	74	82.4234	250023	19040	adam8
6	A6	75	82.7305	244604	22872.9	adam8
6	A6	76	83.0377	238802	28160.2	adam8
6	A6	77	83.3449	230575	35060.9	adam8
6	A6	78	83.652	222190	43447.4	adam8
6	A6	79	83.9592	209435	52755.9	adam8
6	A6	80	84.2664	191019	61948.7	adam8
6	A6	81	84.5735	163170	69663.8	adam8
6	A6	82	84.8807	126204	74539.1	adam8
6	A6	83	85.1879	89608.8	75595.5	adam8
6	A6	84	85.495	57881.3	72521.2	adam8
6	A6	85	85.8022	35554.5	65743.8	adam8
6	A6	86	86.1094	22771.9	56289.5	adam8
6	A6	87	86.4165	15660.7	45503.5	adam8
6	A6	88	86.7237	12946.1	34735.7	adam8
6	A6	89	87.0309	11200.7	25073.4	adam8
6	A6	90	87.338	10473.5	17175.2	adam8
6	A6	91	87.6452	9096.93	11403.8	adam8
6	A6	92	87.9524	7604.99	7558.33	adam8
6	A6	93	88.2595	6716.86	5006.14	adam8
6	A6	94	88.5667	6201.8	3354.1	adam8
6	A6	95	88.8739	6404.15	2278.33	adam8
6	A6	96	89.181	5689.65	1560.76	adam8
6	A6	97	89.4882	6206.6	1073.62	adam8
6	A6	98	89.7953	6151.7	744.147	adam8
6	A6	99	90.1025	4987.65	525.814	adam8
6	A6	100	90.4097	5359.82	385.192	adam8
6	A6	101	90.7169	5576.65	299.354	adam8
6	A6	102	91.024	5721.27	254.356	adam8
6	A6	103	91.3312	5298.78	240.654	adam8
6	A6	104	91.6384	4826.36	247.962	adam8
6	A6	105	91.9455	5160.54	263.8	adam8
6	A6	106	92.2527	4805.42	276.3	adam8
6	A6	107	92.5599	4721.53	277.981	adam8
6	A6	108	92.867	4517.31	267.279	adam8
6	A6	109	93.1742	4644.01	247.34	adam8
6	A6	110	93.4814	4223.96	223.674	adam8
6	A6	111	93.7885	4378.61	201.951	adam8
6	A6	112	94.0957	4590.31	186.249	adam8
6	A6	113	94.4028	3937.01	177.818	adam8
6	A6	114	94.71	4178.32	174.898	adam8
25	C1	1	60.0005	530047	11260.5	gapdh
25	C1	2	60.3074	527530	11422.2	gapdh
25	C1	3	60.6143	525011	11592.4	gapdh
25	C1	4	60.9212	522300	11758.9	gapdh
25	C1	5	61.2281	517161	11918.4	gapdh
25	C1	6	61.535	514425	12075.2	gapdh
25	C1	7	61.8419	510957	12233.3	gapdh
25	C1	8	62.1488	506851	12387.6	gapdh
25	C1	9	62.4557	503009	12522.3	gapdh
25	C1	10	62.7626	499380	12618.5	gapdh
25	C1	11	63.0695	494499	12666	gapdh
25	C1	12	63.3764	490632	12673.2	gapdh
25	C1	13	63.6833	486226	12660.6	gapdh
25	C1	14	63.9902	483068	12649.4	gapdh
25	C1	15	64.2971	479137	12650.7	gapdh
25	C1	16	64.604	475244	12661.7	gapdh
25	C1	17	64.9109	470712	12671.5	gapdh
25	C1	18	65.2178	466400	12671.6	gapdh
25	C1	19	65.5247	462725	12661.8	gapdh
25	C1	20	65.8316	458319	12648.8	gapdh
25	C1	21	66.1385	454738	12639.5	gapdh
25	C1	22	66.4454	450737	12634.9	gapdh
25	C1	23	66.7523	446404	12628.5	gapdh
25	C1	24	67.0592	442575	12609.4	gapdh
25	C1	25	67.3661	438813	12569	gapdh
25	C1	26	67.673	434297	12507.4	gapdh
25	C1	27	67.98	430353	12434.5	gapdh
25	C1	28	68.2869	426746	12367.1	gapdh
25	C1	29	68.5938	423384	12321.3	gapdh
25	C1	30	68.9007	418902	12304.9	gapdh
25	C1	31	69.2076	416099	12313.4	gapdh
25	C1	32	69.5145	411456	12330.9	gapdh
25	C1	33	69.8214	407617	12336.3	gapdh
25	C1	34	70.1283	403990	12311	gapdh
25	C1	35	70.4352	399238	12246.1	gapdh
25	C1	36	70.7421	395776	12146	gapdh
25	C1	37	71.049	391364	12027.1	gapdh
25	C1	38	71.3559	388586	11911.3	gapdh
25	C1	39	71.6628	384748	11817.9	gapdh
25	C1	40	71.9697	380896	11757.2	gapdh
25	C1	41	72.2766	377846	11729.8	gapdh
25	C1	42	72.5835	374145	11730.7	gapdh
25	C1	43	72.8904	369867	11755.6	gapdh
25	C1	44	73.1973	367011	11807.4	gapdh
25	C1	45	73.5042	363025	11896.9	gapdh
25	C1	46	73.8111	359278	12038.7	gapdh
25	C1	47	74.118	355919	12242.2	gapdh
25	C1	48	74.4249	352391	12502.2	gapdh
25	C1	49	74.7318	347985	12787.9	gapdh
25	C1	50	75.0387	344958	13054.9	gapdh
25	C1	51	75.3456	340247	13258	gapdh
25	C1	52	75.6525	335431	13361.6	gapdh
25	C1	53	75.9594	330070	13358.6	gapdh
25	C1	54	76.2663	327498	13270.4	gapdh
25	C1	55	76.5732	322885	13135.4	gapdh
25	C1	56	76.8801	319399	12991.5	gapdh
25	C1	57	77.187	314834	12866.6	gapdh
25	C1	58	77.4939	310745	12776.3	gapdh
25	C1	59	77.8008	306330	12728.2	gapdh
25	C1	60	78.1077	303941	12723.7	gapdh
25	C1	61	78.4146	299732	12759.2	gapdh
25	C1	62	78.7215	294657	12826.9	gapdh
25	C1	63	79.0284	290971	12919.3	gapdh
25	C1	64	79.3353	286797	13030	gapdh
25	C1	65	79.6422	283469	13152.3	gapdh
25	C1	66	79.9491	279411	13274.6	gapdh
25	C1	67	80.256	274672	13382.5	gapdh
25	C1	68	80.5629	270454	13468.4	gapdh
25	C1	69	80.8699	265457	13545	gapdh
25	C1	70	81.1768	262390	13654.2	gapdh
25	C1	71	81.4837	258146	13864	gapdh
25	C1	72	81.7906	253847	14258.2	gapdh
25	C1	73	82.0975	249923	14924.2	gapdh
25	C1	74	82.4044	245910	15942.7	gapdh
25	C1	75	82.7113	240727	17380.5	gapdh
25	C1	76	83.0182	235755	19278.5	gapdh
25	C1	77	83.3251	229987	21635.9	gapdh
25	C1	78	83.632	223125	24395.1	gapdh
25	C1	79	83.9389	215944	27443.3	gapdh
25	C1	80	84.2458	206193	30640.8	gapdh
25	C1	81	84.5527	194080	33869.6	gapdh
25	C1	82	84.8596	180116	37066.6	gapdh
25	C1	83	85.1665	166779	40206.2	gapdh
25	C1	84	85.4734	151513	43221.2	gapdh
25	C1	85	85.7803	133974	45912.3	gapdh
25	C1	86	86.0872	115234	47918.6	gapdh
25	C1	87	86.3941	95833.7	48798.1	gapdh
25	C1	88	86.701	77793.2	48192	gapdh
25	C1	89	87.0079	60502.4	45988.6	gapdh
25	C1	90	87.3148	48573.3	42395.7	gapdh
25	C1	91	87.6217	38110.9	37881.4	gapdh
25	C1	92	87.9286	32463.2	33009.5	gapdh
25	C1	93	88.2355	28050.6	28250.1	gapdh
25	C1	94	88.5424	20226.3	23857.4	gapdh
25	C1	95	88.8493	12341.1	19865.3	gapdh
25	C1	96	89.1562	7710.18	16190	gapdh
25	C1	97	89.4631	5382.97	12762.2	gapdh
25	C1	98	89.77	5233.89	9527.3	gapdh
25	C1	99	90.0769	5523.63	6684.79	gapdh
25	C1	100	90.3838	5450.56	4365.08	gapdh
25	C1	101	90.6907	5417.72	2631.12	gapdh
25	C1	102	90.9976	4385.78	1452.2	gapdh
25	C1	103	91.3045	5161.78	726.887	gapdh
25	C1	104	91.6114	5135.16	329.297	gapdh
25	C1	105	91.9183	4990.65	145.841	gapdh
25	C1	106	92.2252	4773.12	88.5439	gapdh
25	C1	107	92.5321	5010.57	91.1816	gapdh
25	C1	108	92.839	4439.07	101.741	gapdh
25	C1	109	93.1459	3719.09	79.8467	gapdh
25	C1	110	93.4528	4328.62	-0.695312	gapdh
25	C1	111	93.7597	4158.7	-148.785	gapdh
25	C1	112	94.0666	3833.25	-356.398	gapdh
25	C1	113	94.3735	4428.02	-603.32	gapdh
25	C1	114	94.6805	4360.41	-864.526	gapdh
26	C2	1	60.0005	740059	16168.4	gapdh
26	C2	2	60.3074	737054	16388.7	gapdh
26	C2	3	60.6143	732781	16598.1	gapdh
26	C2	4	60.9212	726523	16760.3	gapdh
26	C2	5	61.2281	722026	16855.4	gapdh
26	C2	6	61.535	718422	16885.2	gapdh
26	C2	7	61.8419	711814	16869.7	gapdh
26	C2	8	62.1488	706288	16839.3	gapdh
26	C2	9	62.4557	700336	16825.7	gapdh
26	C2	10	62.7626	697555	16851.3	gapdh
26	C2	11	63.0695	690354	16922.9	gapdh
26	C2	12	63.3764	686835	17029.7	gapdh
26	C2	13	63.6833	680162	17155.1	gapdh
26	C2	14	63.9902	675008	17272.8	gapdh
26	C2	15	64.2971	669961	17360	gapdh
26	C2	16	64.604	664392	17405.1	gapdh
26	C2	17	64.9109	658223	17405.3	gapdh
26	C2	18	65.2178	652715	17367.5	gapdh
26	C2	19	65.5247	647396	17305.2	gapdh
26	C2	20	65.8316	641902	17235	gapdh
26	C2	21	66.1385	636464	17171.9	gapdh
26	C2	22	66.4454	630829	17124	gapdh
26	C2	23	66.7523	625622	17090.3	gapdh
26	C2	24	67.0592	620849	17061.3	gapdh
26	C2	25	67.3661	614978	17023.6	gapdh
26	C2	26	67.673	609619	16966.8	gapdh
26	C2	27	67.98	603892	16891.4	gapdh
26	C2	28	68.2869	599020	16807.7	gapdh
26	C2	29	68.5938	593898	16728.3	gapdh
26	C2	30	68.9007	589181	16659.3	gapdh
26	C2	31	69.2076	584400	16597.8	gapdh
26	C2	32	69.5145	578134	16535.8	gapdh
26	C2	33	69.8214	572655	16469.4	gapdh
26	C2	34	70.1283	568678	16403.7	gapdh
26	C2	35	70.4352	562914	16353.1	gapdh
26	C2	36	70.7421	557311	16336.5	gapdh
26	C2	37	71.049	553119	16373.1	gapdh
26	C2	38	71.3559	547701	16478	gapdh
26	C2	39	71.6628	542902	16658.6	gapdh
26	C2	40	71.9697	538105	16909.8	gapdh
26	C2	41	72.2766	532462	17217.1	gapdh
26	C2	42	72.5835	527532	17541.4	gapdh
26	C2	43	72.8904	522631	17817.2	gapdh
26	C2	44	73.1973	516014	17992.2	gapdh
26	C2	45	73.5042	509285	18037.3	gapdh
26	C2	46	73.8111	504675	17958.3	gapdh
26	C2	47	74.118	498399	17792.2	gapdh
26	C2	48	74.4249	493665	17589.5	gapdh
26	C2	49	74.7318	489231	17392.6	gapdh
26	C2	50	75.0387	483185	17222.1	gapdh
26	C2	51	75.3456	478231	17079.5	gapdh
26	C2	52	75.6525	472389	16964	gapdh
26	C2	53	75.9594	468136	16864.7	gapdh
26	C2	54	76.2663	462949	16786.3	gapdh
26	C2	55	76.5732	456955	16740.9	gapdh
26	C2	56	76.8801	452187	16742.5	gapdh
26	C2	57	77.187	447234	16797.7	gapdh
26	C2	58	77.4939	442390	16900.2	gapdh
26	C2	59	77.8008	436806	17030.2	gapdh
26	C2	60	78.1077	431198	17166.3	gapdh
26	C2	61	78.4146	425727	17282.8	gapdh
26	C2	62	78.7215	419930	17369.4	gapdh
26	C2	63	79.0284	414633	17432.6	gapdh
26	C2	64	79.3353	410099	17485	gapdh
26	C2	65	79.6422	403946	17533.7	gapdh
26	C2	66	79.9491	399055	17576.8	gapdh
26	C2	67	80.256	392679	17607.7	gapdh
26	C2	68	80.5629	387932	17626.6	gapdh
26	C2	69	80.8699	382695	17649.8	gapdh
26	C2	70	81.1768	376785	17715.2	gapdh
26	C2	71	81.4837	371531	17882.3	gapdh
26	C2	72	81.7906	366560	18228.4	gapdh
26	C2	73	82.0975	361303	18843.1	gapdh
26	C2	74	82.4044	355876	19821.7	gapdh
26	C2	75	82.7113	349569	21259.2	gapdh
26	C2	76	83.0182	344477	23242.4	gapdh
26	C2	77	83.3251	336648	25845.7	gapdh
26	C2	78	83.632	329660	29133.5	gapdh
26	C2	79	83.9389	321446	33182.3	gapdh
26	C2	80	84.2458	310386	38117.1	gapdh
26	C2	81	84.5527	298653	44134.6	gapdh
26	C2	82	84.8596	282861	51457.5	gapdh
26	C2	83	85.1665	267861	60180.5	gapdh
26	C2	84	85.4734	245906	70032.3	gapdh
26	C2	85	85.7803	216950	80177	gapdh
26	C2	86	86.0872	181480	89206	gapdh
26	C2	87	86.3941	140083	95407.6	gapdh
26	C2	88	86.701	101955	97247.7	gapdh
26	C2	89	87.0079	65859.7	93869.9	gapdh
26	C2	90	87.3148	36709.8	85406	gapdh
26	C2	91	87.6217	18530.6	72971	gapdh
26	C2	92	87.9286	10376.6	58355.1	gapdh
26	C2	93	88.2355	8442.99	43535.8	gapdh
26	C2	94	88.5424	7637.62	30191.4	gapdh
26	C2	95	88.8493	7093.85	19376.4	gapdh
26	C2	96	89.1562	7017.65	11751.4	gapdh
26	C2	97	89.4631	7190.05	6754.69	gapdh
26	C2	98	89.77	6755.09	3729.31	gapdh
26	C2	99	90.0769	6593.24	2063.02	gapdh
26	C2	100	90.3838	6510.42	1217.65	gapdh
26	C2	101	90.6907	5580.62	800.649	gapdh
26	C2	102	90.9976	5119.41	571.381	gapdh
26	C2	103	91.3045	5656.51	411.371	gapdh
26	C2	104	91.6114	5990.81	281.635	gapdh
26	C2	105	91.9183	5330.51	181.881	gapdh
26	C2	106	92.2252	5287.07	120.584	gapdh
26	C2	107	92.5321	5601.4	99.2422	gapdh
26	C2	108	92.839	5544.74	108.619	gapdh
26	C2	109	93.1459	5348.03	132.035	gapdh
26	C2	110	93.4528	4293.98	151.371	gapdh
26	C2	111	93.7597	5411.61	153.086	gapdh
26	C2	112	94.0666	4533.58	132.092	gapdh
26	C2	113	94.3735	4874.14	91.875	gapdh
26	C2	114	94.6805	4669.19	41.0527	gapdh
27	C3	1	60.0002	705512	15389.6	gapdh
27	C3	2	60.3071	702495	15588.6	gapdh
27	C3	3	60.6139	698674	15815.1	gapdh
27	C3	4	60.9208	693794	16052.8	gapdh
27	C3	5	61.2277	689960	16285.2	gapdh
27	C3	6	61.5346	684880	16498.8	gapdh
27	C3	7	61.8414	679915	16685.7	gapdh
27	C3	8	62.1483	674194	16844.4	gapdh
27	C3	9	62.4552	668386	16979.3	gapdh
27	C3	10	62.7621	663527	17096.8	gapdh
27	C3	11	63.0689	658568	17199.3	gapdh
27	C3	12	63.3758	653312	17283.4	gapdh
27	C3	13	63.6827	646748	17344.7	gapdh
27	C3	14	63.9896	642215	17366.8	gapdh
27	C3	15	64.2964	636567	17341.5	gapdh
27	C3	16	64.6033	631078	17275.8	gapdh
27	C3	17	64.9102	624995	17187.4	gapdh
27	C3	18	65.2171	619784	17092	gapdh
27	C3	19	65.5239	613936	17009.6	gapdh
27	C3	20	65.8308	609671	16953	gapdh
27	C3	21	66.1377	603750	16923.3	gapdh
27	C3	22	66.4446	598400	16911	gapdh
27	C3	23	66.7514	592376	16900.7	gapdh
27	C3	24	67.0583	588127	16877.7	gapdh
27	C3	25	67.3652	582408	16832.9	gapdh
27	C3	26	67.6721	576878	16767	gapdh
27	C3	27	67.9789	571450	16690.5	gapdh
27	C3	28	68.2858	566373	16618.7	gapdh
27	C3	29	68.5927	561677	16562.8	gapdh
27	C3	30	68.8996	557201	16521.7	gapdh
27	C3	31	69.2064	551824	16482.3	gapdh
27	C3	32	69.5133	545821	16429.3	gapdh
27	C3	33	69.8202	540547	16356.3	gapdh
27	C3	34	70.1271	535825	16270.8	gapdh
27	C3	35	70.4339	530448	16189.4	gapdh
27	C3	36	70.7408	525893	16128.9	gapdh
27	C3	37	71.0477	520702	16102	gapdh
27	C3	38	71.3546	515456	16119.4	gapdh
27	C3	39	71.6614	510385	16194.8	gapdh
27	C3	40	71.9683	505731	16343.7	gapdh
27	C3	41	72.2752	501330	16573.9	gapdh
27	C3	42	72.5821	496125	16872.9	gapdh
27	C3	43	72.8889	491427	17201.7	gapdh
27	C3	44	73.1958	485859	17529.5	gapdh
27	C3	45	73.5027	479139	17782.5	gapdh
27	C3	46	73.8096	473407	17917	gapdh
27	C3	47	74.1164	467724	17937.2	gapdh
27	C3	48	74.4233	462936	17875.3	gapdh
27	C3	49	74.7302	457472	17772.4	gapdh
27	C3	50	75.0371	452177	17663.7	gapdh
27	C3	51	75.3439	445964	17572.4	gapdh
27	C3	52	75.6508	441596	17512.1	gapdh
27	C3	53	75.9577	436416	17492.3	gapdh
27	C3	54	76.2646	430752	17522.9	gapdh
27	C3	55	76.5714	424984	17614.9	gapdh
27	C3	56	76.8783	419538	17776.8	gapdh
27	C3	57	77.1852	414786	18008.9	gapdh
27	C3	58	77.4921	409199	18296.9	gapdh
27	C3	59	77.7989	402841	18613.7	gapdh
27	C3	60	78.1058	397085	18928	gapdh
27	C3	61	78.4127	391025	19217	gapdh
27	C3	62	78.7196	384458	19474.3	gapdh
27	C3	63	79.0264	379177	19706.6	gapdh
27	C3	64	79.3333	373104	19924.5	gapdh
27	C3	65	79.6402	366386	20131.1	gapdh
27	C3	66	79.9471	360743	20318.8	gapdh
27	C3	67	80.2539	354430	20475.5	gapdh
27	C3	68	80.5608	347642	20595.6	gapdh
27	C3	69	80.8677	341583	20692.5	gapdh
27	C3	70	81.1746	335304	20807	gapdh
27	C3	71	81.4814	329272	21012.6	gapdh
27	C3	72	81.7883	323184	21419	gapdh
27	C3	73	82.0952	316404	22176.1	gapdh
27	C3	74	82.4021	310686	23471.6	gapdh
27	C3	75	82.7089	304048	25510.7	gapdh
27	C3	76	83.0158	297401	28467.9	gapdh
27	C3	77	83.3227	290208	32410.2	gapdh
27	C3	78	83.6296	281621	37213.5	gapdh
27	C3	79	83.9364	270751	42521	gapdh
27	C3	80	84.2433	257894	47788.2	gapdh
27	C3	81	84.5502	238801	52428.4	gapdh
27	C3	82	84.8571	215549	56001.4	gapdh
27	C3	83	85.1639	192408	58343	gapdh
27	C3	84	85.4708	173579	59549.9	gapdh
27	C3	85	85.7777	156791	59831.6	gapdh
27	C3	86	86.0846	138213	59335.8	gapdh
27	C3	87	86.3914	118437	58073.2	gapdh
27	C3	88	86.6983	100069	55980.7	gapdh
27	C3	89	87.0052	85565.8	53060.4	gapdh
27	C3	90	87.3121	72658	49478.7	gapdh
27	C3	91	87.6189	59921.1	45549.2	gapdh
27	C3	92	87.9258	50637.5	41606.4	gapdh
27	C3	93	88.2327	43719.8	37844.6	gapdh
27	C3	94	88.5396	34377.7	34221.3	gapdh
27	C3	95	88.8464	21771.8	30493.4	gapdh
27	C3	96	89.1533	8179.36	26382	gapdh
27	C3	97	89.4602	4293.56	21774.1	gapdh
27	C3	98	89.7671	4083.95	16887.5	gapdh
27	C3	99	90.0739	3810.02	12547.9	gapdh
27	C3	100	90.3808	3450.16	8685.69	gapdh
27	C3	101	90.6877	3559.33	5599.12	gapdh
27	C3	102	90.9946	2910.38	3384.51	gapdh
27	C3	103	91.3014	3109.02	1954.61	gapdh
27	C3	104	91.6083	3086.92	1121.75	gapdh
27	C3	105	91.9152	2836.39	683.285	gapdh
27	C3	106	92.2221	3221.69	471.197	gapdh
27	C3	107	92.5289	2732.18	363.426	gapdh
27	C3	108	92.8358	2187.78	274.691	gapdh
27	C3	109	93.1427	2573.04	144.254	gapdh
27	C3	110	93.4496	2107.59	-71.3301	gapdh
27	C3	111	93.7564	2777.81	-399.652	gapdh
27	C3	112	94.0633	2634.62	-849.871	gapdh
27	C3	113	94.3702	2260.3	-1408.89	gapdh
27	C3	114	94.6771	2603.23	-2040.99	gapdh
28	C4	1	60.0002	880758	20398.4	adam8
28	C4	2	60.3071	876958	20664.4	adam8
28	C4	3	60.6139	872490	20937.4	adam8
28	C4	4	60.9208	864895	21183.7	adam8
28	C4	5	61.2277	858904	21397.8	adam8
28	C4	6	61.5346	852512	21614.9	adam8
28	C4	7	61.8414	846163	21806.7	adam8
28	C4	8	62.1483	839504	21987	adam8
28	C4	9	62.4552	831619	22156.2	adam8
28	C4	10	62.7621	825397	22306	adam8
28	C4	11	63.0689	817334	22427	adam8
28	C4	12	63.3758	811805	22516.1	adam8
28	C4	13	63.6827	803390	22576	adam8
28	C4	14	63.9896	796386	22611	adam8
28	C4	15	64.2964	790415	22622.7	adam8
28	C4	16	64.6033	782141	22608.1	adam8
28	C4	17	64.9102	775611	22563.9	adam8
28	C4	18	65.2171	768017	22494.3	adam8
28	C4	19	65.5239	759981	22415.3	adam8
28	C4	20	65.8308	753741	22351.6	adam8
28	C4	21	66.1377	746561	22324.8	adam8
28	C4	22	66.4446	739300	22341	adam8
28	C4	23	66.7514	732577	22384.1	adam8
28	C4	24	67.0583	725626	22422.2	adam8
28	C4	25	67.3652	718306	22420.1	adam8
28	C4	26	67.6721	710212	22355.7	adam8
28	C4	27	67.9789	704249	22228.2	adam8
28	C4	28	68.2858	696643	22055.9	adam8
28	C4	29	68.5927	690754	21867.1	adam8
28	C4	30	68.8996	683345	21689.6	adam8
28	C4	31	69.2064	676510	21542.9	adam8
28	C4	32	69.5133	670092	21431.7	adam8
28	C4	33	69.8202	663711	21347.7	adam8
28	C4	34	70.1271	656397	21282.2	adam8
28	C4	35	70.4339	649214	21204.1	adam8
28	C4	36	70.7408	642765	21113.7	adam8
28	C4	37	71.0477	634656	21034.6	adam8
28	C4	38	71.3546	629936	21010.7	adam8
28	C4	39	71.6614	623005	21088.8	adam8
28	C4	40	71.9683	616319	21294.1	adam8
28	C4	41	72.2752	611339	21678.9	adam8
28	C4	42	72.5821	604124	22141.4	adam8
28	C4	43	72.8889	597792	22549.9	adam8
28	C4	44	73.1958	588036	22798.8	adam8
28	C4	45	73.5027	580960	22832.8	adam8
28	C4	46	73.8096	574423	22663.5	adam8
28	C4	47	74.1164	567280	22355	adam8
28	C4	48	74.4233	560816	21989.6	adam8
28	C4	49	74.7302	553899	21634.2	adam8
28	C4	50	75.0371	548059	21330.6	adam8
28	C4	51	75.3439	541260	21124	adam8
28	C4	52	75.6508	534342	20941.9	adam8
28	C4	53	75.9577	528581	20767	adam8
28	C4	54	76.2646	521724	20585.9	adam8
28	C4	55	76.5714	515077	20395.6	adam8
28	C4	56	76.8783	508900	20205.8	adam8
28	C4	57	77.1852	501869	20037.3	adam8
28	C4	58	77.4921	496094	19914.8	adam8
28	C4	59	77.7989	490532	19854.7	adam8
28	C4	60	78.1058	484278	19856.6	adam8
28	C4	61	78.4127	477956	19904.3	adam8
28	C4	62	78.7196	471180	19975.4	adam8
28	C4	63	79.0264	464610	20054.6	adam8
28	C4	64	79.3333	458134	20139.7	adam8
28	C4	65	79.6402	453031	20236.6	adam8
28	C4	66	79.9471	446134	20349.4	adam8
28	C4	67	80.2539	439988	20478.2	adam8
28	C4	68	80.5608	433154	20628.5	adam8
28	C4	69	80.8677	426429	20831.1	adam8
28	C4	70	81.1746	420170	21162	adam8
28	C4	71	81.4814	413892	21865.7	adam8
28	C4	72	81.7883	407713	23215.3	adam8
28	C4	73	82.0952	401641	25507	adam8
28	C4	74	82.4021	394167	29189.1	adam8
28	C4	75	82.7089	386092	34789.5	adam8
28	C4	76	83.0158	378986	42835.8	adam8
28	C4	77	83.3227	367843	53685.6	adam8
28	C4	78	83.6296	356416	67283.7	adam8
28	C4	79	83.9364	340042	82931.7	adam8
28	C4	80	84.2433	317822	99205.7	adam8
28	C4	81	84.5502	283077	114124	adam8
28	C4	82	84.8571	234561	125551	adam8
28	C4	83	85.1639	180475	131697	adam8
28	C4	84	85.4708	127636	131516	adam8
28	C4	85	85.7777	84603.1	124886	adam8
28	C4	86	86.0846	52831.9	112585	adam8
28	C4	87	86.3914	31437.4	96110.3	adam8
28	C4	88	86.6983	18254.6	77406.4	adam8
28	C4	89	87.0052	11160.1	58517.5	adam8
28	C4	90	87.3121	8483.62	41218.5	adam8
28	C4	91	87.6189	7063.62	26721.6	adam8
28	C4	92	87.9258	6484.86	16802.5	adam8
28	C4	93	88.2327	5759.47	10579.4	adam8
28	C4	94	88.5396	6077.71	6501.53	adam8
28	C4	95	88.8464	5628.65	4031.54	adam8
28	C4	96	89.1533	5069.07	2640.21	adam8
28	C4	97	89.4602	4265.93	1894.74	adam8
28	C4	98	89.7671	3737.64	1491.03	adam8
28	C4	99	90.0739	3961.99	1246.53	adam8
28	C4	100	90.3808	3697.43	1071.32	adam8
28	C4	101	90.6877	3448.62	932.479	adam8
28	C4	102	90.9946	3280.2	822.84	adam8
28	C4	103	91.3014	3168.22	740.85	adam8
28	C4	104	91.6083	3057.11	681.852	adam8
28	C4	105	91.9152	2786.26	637.375	adam8
28	C4	106	92.2221	2868.2	598.148	adam8
28	C4	107	92.5289	2208.15	557.701	adam8
28	C4	108	92.8358	2287.26	514.453	adam8
28	C4	109	93.1427	2909.82	470.887	adam8
28	C4	110	93.4496	2060.98	430.064	adam8
28	C4	111	93.7564	2386.27	391.85	adam8
28	C4	112	94.0633	2181.48	351.861	adam8
28	C4	113	94.3702	1808.53	304.191	adam8
28	C4	114	94.6771	2072.33	245.607	adam8
29	C5	1	60.0002	744250	17408.1	adam8
29	C5	2	60.3074	740839	17654.3	adam8
29	C5	3	60.6145	736476	17910.5	adam8
29	C5	4	60.9217	730267	18177.4	adam8
29	C5	5	61.2289	725684	18386.2	adam8
29	C5	6	61.536	719865	18531.9	adam8
29	C5	7	61.8432	713553	18631	adam8
29	C5	8	62.1504	707501	18708.1	adam8
29	C5	9	62.4575	701673	18784.1	adam8
29	C5	10	62.7647	696131	18868.5	adam8
29	C5	11	63.0719	689389	18959.8	adam8
29	C5	12	63.379	684368	19051	adam8
29	C5	13	63.6862	677094	19133.5	adam8
29	C5	14	63.9934	671467	19198.4	adam8
29	C5	15	64.3005	665546	19234.2	adam8
29	C5	16	64.6077	659600	19226.2	adam8
29	C5	17	64.9149	652656	19161.5	adam8
29	C5	18	65.222	646502	19038.5	adam8
29	C5	19	65.5292	639958	18874.4	adam8
29	C5	20	65.8364	633741	18702.5	adam8
29	C5	21	66.1435	627928	18559.6	adam8
29	C5	22	66.4507	622735	18470.9	adam8
29	C5	23	66.7579	616251	18439.3	adam8
29	C5	24	67.065	610515	18446.1	adam8
29	C5	25	67.3722	604620	18460.3	adam8
29	C5	26	67.6794	598777	18454.4	adam8
29	C5	27	67.9865	592311	18413.9	adam8
29	C5	28	68.2937	586540	18341	adam8
29	C5	29	68.6009	580703	18248.1	adam8
29	C5	30	68.908	575308	18146.2	adam8
29	C5	31	69.2152	570448	18037.9	adam8
29	C5	32	69.5224	563088	17920.4	adam8
29	C5	33	69.8295	557677	17810.8	adam8
29	C5	34	70.1367	551678	17702	adam8
29	C5	35	70.4439	546395	17613.5	adam8
29	C5	36	70.751	540589	17570.9	adam8
29	C5	37	71.0582	535402	17598	adam8
29	C5	38	71.3654	529234	17710.1	adam8
29	C5	39	71.6725	524353	17907.7	adam8
29	C5	40	71.9797	518538	18213.8	adam8
29	C5	41	72.2869	513599	18547.5	adam8
29	C5	42	72.594	507078	18836	adam8
29	C5	43	72.9012	500454	19007.9	adam8
29	C5	44	73.2084	493690	19016.6	adam8
29	C5	45	73.5155	488014	18858.9	adam8
29	C5	46	73.8227	481535	18575.9	adam8
29	C5	47	74.1299	476133	18235	adam8
29	C5	48	74.437	471109	17904.5	adam8
29	C5	49	74.7442	465659	17664.7	adam8
29	C5	50	75.0514	460474	17480.8	adam8
29	C5	51	75.3585	453976	17343.9	adam8
29	C5	52	75.6657	449475	17235.7	adam8
29	C5	53	75.9729	444051	17137.5	adam8
29	C5	54	76.28	438919	17036.3	adam8
29	C5	55	76.5872	432415	16927.9	adam8
29	C5	56	76.8944	427128	16817.1	adam8
29	C5	57	77.2015	422530	16715.5	adam8
29	C5	58	77.5087	417003	16636.3	adam8
29	C5	59	77.8159	411739	16588.6	adam8
29	C5	60	78.123	406009	16574.7	adam8
29	C5	61	78.4302	401065	16590	adam8
29	C5	62	78.7374	396166	16625.7	adam8
29	C5	63	79.0445	390289	16671.6	adam8
29	C5	64	79.3517	384540	16718.2	adam8
29	C5	65	79.6589	379793	16760	adam8
29	C5	66	79.966	374410	16797.9	adam8
29	C5	67	80.2732	369059	16844.5	adam8
29	C5	68	80.5804	363577	16931.4	adam8
29	C5	69	80.8875	358307	17121.3	adam8
29	C5	70	81.1947	353091	17519.5	adam8
29	C5	71	81.5019	348102	18348.9	adam8
29	C5	72	81.809	342278	19938.2	adam8
29	C5	73	82.1162	337988	22557.6	adam8
29	C5	74	82.4234	331032	26612.7	adam8
29	C5	75	82.7305	324065	32534.8	adam8
29	C5	76	83.0377	315513	40677.9	adam8
29	C5	77	83.3449	304750	51143.9	adam8
29	C5	78	83.652	292036	63567.5	adam8
29	C5	79	83.9592	273628	76956.8	adam8
29	C5	80	84.2664	246545	89719.9	adam8
29	C5	81	84.5735	206387	99947.1	adam8
29	C5	82	84.8807	158835	105892	adam8
29	C5	83	85.1879	113647	106465	adam8
29	C5	84	85.495	74064.5	101513	adam8
29	C5	85	85.8022	46498.4	91801.6	adam8
29	C5	86	86.1094	28991.8	78738.1	adam8
29	C5	87	86.4165	17773.3	63995.7	adam8
29	C5	88	86.7237	11448.9	49179.1	adam8
29	C5	89	87.0309	7457.43	35587.2	adam8
29	C5	90	87.338	6296.3	24083.3	adam8
29	C5	91	87.6452	6251.29	15476.4	adam8
29	C5	92	87.9524	5847.69	9867.14	adam8
29	C5	93	88.2595	5236.49	6082.47	adam8
29	C5	94	88.5667	5027.72	3715.32	adam8
29	C5	95	88.8739	4674.16	2340.97	adam8
29	C5	96	89.181	3787.8	1594.95	adam8
29	C5	97	89.4882	4247.37	1207.19	adam8
29	C5	98	89.7953	3514.74	1000.52	adam8
29	C5	99	90.1025	3236.82	870.037	adam8
29	C5	100	90.4097	2609.45	759.482	adam8
29	C5	101	90.7169	2843.29	643.824	adam8
29	C5	102	91.024	2486.73	518.963	adam8
29	C5	103	91.3312	2338.68	394.941	adam8
29	C5	104	91.6384	2354.78	288.75	adam8
29	C5	105	91.9455	2540.25	215.613	adam8
29	C5	106	92.2527	3074.72	180.779	adam8
29	C5	107	92.5599	1605.85	175.658	adam8
29	C5	108	92.867	2086.77	181.227	adam8
29	C5	109	93.1742	1727.8	177.285	adam8
29	C5	110	93.4814	1651.01	151.902	adam8
29	C5	111	93.7885	2132.02	105.014	adam8
29	C5	112	94.0957	1707.69	44.668	adam8
29	C5	113	94.4028	1487.51	-19.959	adam8
29	C5	114	94.71	1728.68	-83.3633	adam8
30	C6	1	60.0002	715600	17082.7	adam8
30	C6	2	60.3074	712425	17289.2	adam8
30	C6	3	60.6145	707203	17494.8	adam8
30	C6	4	60.9217	701952	17673.2	adam8
30	C6	5	61.2289	697452	17798.2	adam8
30	C6	6	61.536	691185	17875.2	adam8
30	C6	7	61.8432	685416	17925.8	adam8
30	C6	8	62.1504	680186	17975.7	adam8
30	C6	9	62.4575	673920	18043.4	adam8
30	C6	10	62.7647	668590	18134.3	adam8
30	C6	11	63.0719	662615	18241.6	adam8
30	C6	12	63.379	656765	18349.2	adam8
30	C6	13	63.6862	650944	18436.1	adam8
30	C6	14	63.9934	644956	18483	adam8
30	C6	15	64.3005	639129	18478.1	adam8
30	C6	16	64.6077	632696	18422.6	adam8
30	C6	17	64.9149	626067	18330.8	adam8
30	C6	18	65.222	620848	18225.6	adam8
30	C6	19	65.5292	614544	18129.3	adam8
30	C6	20	65.8364	609225	18055.1	adam8
30	C6	21	66.1435	603134	18005	adam8
30	C6	22	66.4507	596803	17972.1	adam8
30	C6	23	66.7579	591254	17944.8	adam8
30	C6	24	67.065	585688	17910.3	adam8
30	C6	25	67.3722	580076	17859.1	adam8
30	C6	26	67.6794	573937	17790	adam8
30	C6	27	67.9865	567641	17714	adam8
30	C6	28	68.2937	562557	17651.3	adam8
30	C6	29	68.6009	557173	17619.5	adam8
30	C6	30	68.908	552015	17619.7	adam8
30	C6	31	69.2152	546748	17629.7	adam8
30	C6	32	69.5224	540350	17612.8	adam8
30	C6	33	69.8295	534032	17536.9	adam8
30	C6	34	70.1367	528470	17397.2	adam8
30	C6	35	70.4439	522179	17211.3	adam8
30	C6	36	70.751	517304	17012.7	adam8
30	C6	37	71.0582	512374	16833.7	adam8
30	C6	38	71.3654	507210	16691.1	adam8
30	C6	39	71.6725	501616	16583.8	adam8
30	C6	40	71.9797	496065	16501.4	adam8
30	C6	41	72.2869	491041	16435.7	adam8
30	C6	42	72.594	486074	16387.2	adam8
30	C6	43	72.9012	481322	16365.3	adam8
30	C6	44	73.2084	475990	16387.6	adam8
30	C6	45	73.5155	470045	16479	adam8
30	C6	46	73.8227	465434	16667.6	adam8
30	C6	47	74.1299	460437	16973.8	adam8
30	C6	48	74.437	455289	17392.2	adam8
30	C6	49	74.7442	450353	17893.5	adam8
30	C6	50	75.0514	445050	18381.9	adam8
30	C6	51	75.3585	437469	18750.9	adam8
30	C6	52	75.6657	430157	18920.8	adam8
30	C6	53	75.9729	424641	18863.6	adam8
30	C6	54	76.28	418970	18610.2	adam8
30	C6	55	76.5872	412540	18233.5	adam8
30	C6	56	76.8944	407446	17820.8	adam8
30	C6	57	77.2015	401412	17449	adam8
30	C6	58	77.5087	396920	17171.3	adam8
30	C6	59	77.8159	391230	16985	adam8
30	C6	60	78.123	386223	16872.4	adam8
30	C6	61	78.4302	380468	16799.1	adam8
30	C6	62	78.7374	374971	16730.1	adam8
30	C6	63	79.0445	369099	16644.5	adam8
30	C6	64	79.3517	363914	16541.7	adam8
30	C6	65	79.6589	359344	16438.7	adam8
30	C6	66	79.966	354165	16361.9	adam8
30	C6	67	80.2732	348733	16342.6	adam8
30	C6	68	80.5804	344079	16420.8	adam8
30	C6	69	80.8875	338508	16656.9	adam8
30	C6	70	81.1947	333649	17147.7	adam8
30	C6	71	81.5019	328812	18063	adam8
30	C6	72	81.809	323506	19630	adam8
30	C6	73	82.1162	317801	22124.4	adam8
30	C6	74	82.4234	311576	25904.9	adam8
30	C6	75	82.7305	304441	31357.8	adam8
30	C6	76	83.0377	296137	38793.8	adam8
30	C6	77	83.3449	284683	48274.2	adam8
30	C6	78	83.652	272084	59402.6	adam8
30	C6	79	83.9592	253418	71182.2	adam8
30	C6	80	84.2664	225315	82059.9	adam8
30	C6	81	84.5735	184147	90223.6	adam8
30	C6	82	84.8807	135119	94089.4	adam8
30	C6	83	85.1879	91386.3	92783.5	adam8
30	C6	84	85.495	56416.1	86405.5	adam8
30	C6	85	85.8022	33487.2	75964	adam8
30	C6	86	86.1094	20576	63047.2	adam8
30	C6	87	86.4165	14706.9	49389.9	adam8
30	C6	88	86.7237	12352.5	36497.9	adam8
30	C6	89	87.0309	9762.72	25415.8	adam8
30	C6	90	87.338	9499.99	16688.6	adam8
30	C6	91	87.6452	9164.07	10546.8	adam8
30	C6	92	87.9524	8495.67	6375.78	adam8
30	C6	93	88.2595	8540.84	3737.17	adam8
30	C6	94	88.5667	8248.65	2178.47	adam8
30	C6	95	88.8739	8114.99	1318.57	adam8
30	C6	96	89.181	7819.68	878.201	adam8
30	C6	97	89.4882	7680.84	672.494	adam8
30	C6	98	89.7953	7388.19	587.016	adam8
30	C6	99	90.1025	7472.25	553.367	adam8
30	C6	100	90.4097	6327.85	531.955	adam8
30	C6	101	90.7169	6857.45	502.488	adam8
30	C6	102	91.024	6372.43	459.006	adam8
30	C6	103	91.3312	6379.07	405.953	adam8
30	C6	104	91.6384	5817.27	353.266	adam8
30	C6	105	91.9455	6209.94	310.502	adam8
30	C6	106	92.2527	6391.83	281.475	adam8
30	C6	107	92.5599	5502.11	261.631	adam8
30	C6	108	92.867	5332.53	240.061	adam8
30	C6	109	93.1742	5480.25	205.645	adam8
30	C6	110	93.4814	5135.23	153.77	adam8
30	C6	111	93.7885	5522.47	88.9238	adam8
30	C6	112	94.0957	5357.69	21.418	adam8
30	C6	113	94.4028	5247.57	-39.1035	adam8
30	C6	114	94.71	5322.94	-88.5977	adam8
49	E1	1	60.0005	648778	12595.9	gapdh
49	E1	2	60.3074	646170	12753.7	gapdh
49	E1	3	60.6143	642538	12919.9	gapdh
49	E1	4	60.9212	639577	13079.4	gapdh
49	E1	5	61.2281	635575	13225	gapdh
49	E1	6	61.535	631165	13359.5	gapdh
49	E1	7	61.8419	626830	13491.4	gapdh
49	E1	8	62.1488	623156	13627.1	gapdh
49	E1	9	62.4557	618769	13763.8	gapdh
49	E1	10	62.7626	614342	13889.2	gapdh
49	E1	11	63.0695	610571	13986.7	gapdh
49	E1	12	63.3764	604836	14045.7	gapdh
49	E1	13	63.6833	600904	14064.7	gapdh
49	E1	14	63.9902	596673	14050.1	gapdh
49	E1	15	64.2971	592352	14013.2	gapdh
49	E1	16	64.604	587672	13966.4	gapdh
49	E1	17	64.9109	582887	13919.9	gapdh
49	E1	18	65.2178	578341	13879.5	gapdh
49	E1	19	65.5247	575099	13845	gapdh
49	E1	20	65.8316	569993	13810.8	gapdh
49	E1	21	66.1385	565506	13773.4	gapdh
49	E1	22	66.4454	560897	13738.4	gapdh
49	E1	23	66.7523	556079	13720.8	gapdh
49	E1	24	67.0592	552748	13736.4	gapdh
49	E1	25	67.3661	549157	13789.2	gapdh
49	E1	26	67.673	544215	13866.9	gapdh
49	E1	27	67.98	539638	13945.6	gapdh
49	E1	28	68.2869	534474	14002.4	gapdh
49	E1	29	68.5938	531553	14026.1	gapdh
49	E1	30	68.9007	526100	14014	gapdh
49	E1	31	69.2076	522238	13969	gapdh
49	E1	32	69.5145	517713	13894.3	gapdh
49	E1	33	69.8214	513770	13795.6	gapdh
49	E1	34	70.1283	507957	13684.9	gapdh
49	E1	35	70.4352	504610	13579.9	gapdh
49	E1	36	70.7421	500435	13500.1	gapdh
49	E1	37	71.049	496534	13460.1	gapdh
49	E1	38	71.3559	491855	13463.6	gapdh
49	E1	39	71.6628	488193	13504.2	gapdh
49	E1	40	71.9697	483822	13567.3	gapdh
49	E1	41	72.2766	479575	13635.6	gapdh
49	E1	42	72.5835	475693	13692	gapdh
49	E1	43	72.8904	471261	13723.5	gapdh
49	E1	44	73.1973	466861	13727.2	gapdh
49	E1	45	73.5042	462034	13715.5	gapdh
49	E1	46	73.8111	458916	13717.3	gapdh
49	E1	47	74.118	453533	13770.7	gapdh
49	E1	48	74.4249	450013	13906.5	gapdh
49	E1	49	74.7318	446819	14126.9	gapdh
49	E1	50	75.0387	442485	14403.2	gapdh
49	E1	51	75.3456	437724	14678.6	gapdh
49	E1	52	75.6525	431931	14889	gapdh
49	E1	53	75.9594	427396	14990.2	gapdh
49	E1	54	76.2663	422374	14971.2	gapdh
49	E1	55	76.5732	418071	14853.3	gapdh
49	E1	56	76.8801	413612	14676.6	gapdh
49	E1	57	77.187	408574	14484.4	gapdh
49	E1	58	77.4939	403792	14311.7	gapdh
49	E1	59	77.8008	400486	14178.1	gapdh
49	E1	60	78.1077	396398	14086	gapdh
49	E1	61	78.4146	391222	14024.2	gapdh
49	E1	62	78.7215	386673	13975.9	gapdh
49	E1	63	79.0284	382342	13928.4	gapdh
49	E1	64	79.3353	378666	13878.8	gapdh
49	E1	65	79.6422	373774	13836.2	gapdh
49	E1	66	79.9491	369460	13815.2	gapdh
49	E1	67	80.256	366092	13830.4	gapdh
49	E1	68	80.5629	361031	13890.6	gapdh
49	E1	69	80.8699	357251	13994.4	gapdh
49	E1	70	81.1768	353771	14132.2	gapdh
49	E1	71	81.4837	347923	14292.1	gapdh
49	E1	72	81.7906	343854	14468.1	gapdh
49	E1	73	82.0975	339042	14670.6	gapdh
49	E1	74	82.4044	335431	14930.9	gapdh
49	E1	75	82.7113	330075	15299.4	gapdh
49	E1	76	83.0182	325554	15838.2	gapdh
49	E1	77	83.3251	321513	16611.7	gapdh
49	E1	78	83.632	316635	17679.8	gapdh
49	E1	79	83.9389	310830	19097.4	gapdh
49	E1	80	84.2458	305333	20923.1	gapdh
49	E1	81	84.5527	299215	23230.9	gapdh
49	E1	82	84.8596	290964	26111.3	gapdh
49	E1	83	85.1665	281508	29649.4	gapdh
49	E1	84	85.4734	269292	33881.6	gapdh
49	E1	85	85.7803	256702	38757.6	gapdh
49	E1	86	86.0872	241082	44142.5	gapdh
49	E1	87	86.3941	221332	49862.9	gapdh
49	E1	88	86.701	203477	55754	gapdh
49	E1	89	87.0079	183982	61635.2	gapdh
49	E1	90	87.3148	165018	67188.7	gapdh
49	E1	91	87.6217	140833	71808.5	gapdh
49	E1	92	87.9286	110816	74565.3	gapdh
49	E1	93	88.2355	73690.7	74406	gapdh
49	E1	94	88.5424	38535.5	70562.9	gapdh
49	E1	95	88.8493	15910.5	62978.7	gapdh
49	E1	96	89.1562	9607.78	52490.4	gapdh
49	E1	97	89.4631	9736.72	40626.7	gapdh
49	E1	98	89.77	9695.53	29106	gapdh
49	E1	99	90.0769	8921.08	19292.3	gapdh
49	E1	100	90.3838	9015.29	11837.4	gapdh
49	E1	101	90.6907	8001.82	6730.42	gapdh
49	E1	102	90.9976	8171.55	3607.84	gapdh
49	E1	103	91.3045	8085.77	1865.33	gapdh
49	E1	104	91.6114	7585.26	965.422	gapdh
49	E1	105	91.9183	8638.42	529.597	gapdh
49	E1	106	92.2252	7467.63	332.488	gapdh
49	E1	107	92.5321	7473.38	253.837	gapdh
49	E1	108	92.839	8180.23	229.646	gapdh
49	E1	109	93.1459	7513.49	219.395	gapdh
49	E1	110	93.4528	7524.4	190.609	gapdh
49	E1	111	93.7597	6492.65	116.669	gapdh
49	E1	112	94.0666	7161.59	-17.874	gapdh
49	E1	113	94.3735	7338.85	-211.568	gapdh
49	E1	114	94.6805	6684.68	-446.229	gapdh
50	E2	1	60.0005	784051	15844.8	gapdh
50	E2	2	60.3074	780106	16029	gapdh
50	E2	3	60.6143	776202	16209.4	gapdh
50	E2	4	60.9212	771112	16358.1	gapdh
50	E2	5	61.2281	766342	16461.5	gapdh
50	E2	6	61.535	761918	16522	gapdh
50	E2	7	61.8419	755833	16550.9	gapdh
50	E2	8	62.1488	751351	16562.1	gapdh
50	E2	9	62.4557	745802	16566.9	gapdh
50	E2	10	62.7626	740605	16574.1	gapdh
50	E2	11	63.0695	735165	16589	gapdh
50	E2	12	63.3764	730462	16614	gapdh
50	E2	13	63.6833	725721	16650.9	gapdh
50	E2	14	63.9902	719418	16694.3	gapdh
50	E2	15	64.2971	714670	16738.3	gapdh
50	E2	16	64.604	709803	16776.3	gapdh
50	E2	17	64.9109	703307	16800	gapdh
50	E2	18	65.2178	699035	16801	gapdh
50	E2	19	65.5247	693564	16774.8	gapdh
50	E2	20	65.8316	686795	16724.4	gapdh
50	E2	21	66.1385	682537	16661.5	gapdh
50	E2	22	66.4454	677216	16602.4	gapdh
50	E2	23	66.7523	671716	16560.6	gapdh
50	E2	24	67.0592	667312	16535.3	gapdh
50	E2	25	67.3661	661463	16522	gapdh
50	E2	26	67.673	656235	16512.8	gapdh
50	E2	27	67.98	651293	16501	gapdh
50	E2	28	68.2869	645934	16481.6	gapdh
50	E2	29	68.5938	641288	16451.2	gapdh
50	E2	30	68.9007	636060	16407.3	gapdh
50	E2	31	69.2076	630796	16351.6	gapdh
50	E2	32	69.5145	625132	16291.7	gapdh
50	E2	33	69.8214	620587	16242.1	gapdh
50	E2	34	70.1283	615707	16220.8	gapdh
50	E2	35	70.4352	610592	16246.9	gapdh
50	E2	36	70.7421	604597	16339	gapdh
50	E2	37	71.049	600319	16513.9	gapdh
50	E2	38	71.3559	595283	16794.7	gapdh
50	E2	39	71.6628	590252	17173.8	gapdh
50	E2	40	71.9697	584639	17602.6	gapdh
50	E2	41	72.2766	580852	18010.4	gapdh
50	E2	42	72.5835	573559	18314.2	gapdh
50	E2	43	72.8904	566554	18449	gapdh
50	E2	44	73.1973	561004	18395.2	gapdh
50	E2	45	73.5042	555356	18185.4	gapdh
50	E2	46	73.8111	550453	17889.3	gapdh
50	E2	47	74.118	544937	17583.3	gapdh
50	E2	48	74.4249	539466	17323.5	gapdh
50	E2	49	74.7318	534862	17132.1	gapdh
50	E2	50	75.0387	530464	17002.1	gapdh
50	E2	51	75.3456	524163	16911.4	gapdh
50	E2	52	75.6525	518312	16839.2	gapdh
50	E2	53	75.9594	514380	16773.7	gapdh
50	E2	54	76.2663	509316	16711	gapdh
50	E2	55	76.5732	503915	16649.9	gapdh
50	E2	56	76.8801	497924	16591.5	gapdh
50	E2	57	77.187	493384	16536.2	gapdh
50	E2	58	77.4939	487736	16483	gapdh
50	E2	59	77.8008	483474	16434.3	gapdh
50	E2	60	78.1077	477575	16388.4	gapdh
50	E2	61	78.4146	472910	16337.9	gapdh
50	E2	62	78.7215	467734	16272.2	gapdh
50	E2	63	79.0284	462311	16185.4	gapdh
50	E2	64	79.3353	457256	16084.3	gapdh
50	E2	65	79.6422	452059	15991	gapdh
50	E2	66	79.9491	447681	15937.8	gapdh
50	E2	67	80.256	443223	15955.2	gapdh
50	E2	68	80.5629	438438	16059.4	gapdh
50	E2	69	80.8699	433435	16247	gapdh
50	E2	70	81.1768	428503	16498.2	gapdh
50	E2	71	81.4837	422976	16804.7	gapdh
50	E2	72	81.7906	417466	17152.2	gapdh
50	E2	73	82.0975	412760	17543.3	gapdh
50	E2	74	82.4044	406613	18019.8	gapdh
50	E2	75	82.7113	401365	18650	gapdh
50	E2	76	83.0182	395860	19517.9	gapdh
50	E2	77	83.3251	390927	20711.4	gapdh
50	E2	78	83.632	384517	22315.4	gapdh
50	E2	79	83.9389	377542	24416.8	gapdh
50	E2	80	84.2458	370304	27122.2	gapdh
50	E2	81	84.5527	363206	30572.6	gapdh
50	E2	82	84.8596	352493	34933.6	gapdh
50	E2	83	85.1665	340746	40337.5	gapdh
50	E2	84	85.4734	325617	46789.9	gapdh
50	E2	85	85.7803	308265	54088.7	gapdh
50	E2	86	86.0872	286887	61822.4	gapdh
50	E2	87	86.3941	260390	69475.1	gapdh
50	E2	88	86.701	234923	76581.3	gapdh
50	E2	89	87.0079	208795	82817.2	gapdh
50	E2	90	87.3148	183340	87940.7	gapdh
50	E2	91	87.6217	157873	91602.6	gapdh
50	E2	92	87.9286	127809	93182.4	gapdh
50	E2	93	88.2355	90738.3	91831.2	gapdh
50	E2	94	88.5424	49761	86790	gapdh
50	E2	95	88.8493	21645.9	77846	gapdh
50	E2	96	89.1562	10832.5	65648	gapdh
50	E2	97	89.4631	8945.51	51649.7	gapdh
50	E2	98	89.77	7359.43	37676.2	gapdh
50	E2	99	90.0769	6348.01	25340.3	gapdh
50	E2	100	90.3838	6180.23	15687.3	gapdh
50	E2	101	90.6907	6480.63	9306.18	gapdh
50	E2	102	90.9976	5405.8	5204.83	gapdh
50	E2	103	91.3045	6023.45	2806.2	gapdh
50	E2	104	91.6114	5756.28	1525.54	gapdh
50	E2	105	91.9183	5677.95	900.742	gapdh
50	E2	106	92.2252	5408.75	620.926	gapdh
50	E2	107	92.5321	5008.79	498.777	gapdh
50	E2	108	92.839	5184.27	427.639	gapdh
50	E2	109	93.1459	4818.68	344.728	gapdh
50	E2	110	93.4528	5339.55	207.227	gapdh
50	E2	111	93.7597	4175.31	-17.8105	gapdh
50	E2	112	94.0666	4507.46	-351.277	gapdh
50	E2	113	94.3735	4613.11	-793.387	gapdh
50	E2	114	94.6805	4161.44	-1318.37	gapdh
51	E3	1	60.0002	750948	14718.2	gapdh
51	E3	2	60.3071	747572	14918.4	gapdh
51	E3	3	60.6139	744367	15147	gapdh
51	E3	4	60.9208	740212	15374.6	gapdh
51	E3	5	61.2277	735803	15573.9	gapdh
51	E3	6	61.5346	730683	15730.5	gapdh
51	E3	7	61.8414	725199	15844.7	gapdh
51	E3	8	62.1483	720755	15927	gapdh
51	E3	9	62.4552	715294	15990.1	gapdh
51	E3	10	62.7621	710773	16042.8	gapdh
51	E3	11	63.0689	705395	16089.7	gapdh
51	E3	12	63.3758	699838	16132.8	gapdh
51	E3	13	63.6827	695641	16174	gapdh
51	E3	14	63.9896	689801	16208.7	gapdh
51	E3	15	64.2964	685109	16231.3	gapdh
51	E3	16	64.6033	680137	16233.8	gapdh
51	E3	17	64.9102	674233	16208.2	gapdh
51	E3	18	65.2171	669484	16152.8	gapdh
51	E3	19	65.5239	663319	16078.2	gapdh
51	E3	20	65.8308	658840	15997.9	gapdh
51	E3	21	66.1377	654014	15923.9	gapdh
51	E3	22	66.4446	648136	15867.6	gapdh
51	E3	23	66.7514	643582	15834	gapdh
51	E3	24	67.0583	638667	15820.4	gapdh
51	E3	25	67.3652	633340	15817.2	gapdh
51	E3	26	67.6721	629066	15811.3	gapdh
51	E3	27	67.9789	623303	15791.6	gapdh
51	E3	28	68.2858	618513	15754.9	gapdh
51	E3	29	68.5927	613357	15707.5	gapdh
51	E3	30	68.8996	608895	15661.4	gapdh
51	E3	31	69.2064	603985	15626.6	gapdh
51	E3	32	69.5133	599317	15604.9	gapdh
51	E3	33	69.8202	593833	15588.4	gapdh
51	E3	34	70.1271	589555	15564.6	gapdh
51	E3	35	70.4339	583167	15521.7	gapdh
51	E3	36	70.7408	579096	15454.3	gapdh
51	E3	37	71.0477	574012	15363.6	gapdh
51	E3	38	71.3546	569684	15257.3	gapdh
51	E3	39	71.6614	564064	15147.8	gapdh
51	E3	40	71.9683	559571	15050.2	gapdh
51	E3	41	72.2752	555321	14977	gapdh
51	E3	42	72.5821	551402	14934	gapdh
51	E3	43	72.8889	546678	14919.2	gapdh
51	E3	44	73.1958	541227	14929.4	gapdh
51	E3	45	73.5027	536767	14971.7	gapdh
51	E3	46	73.8096	532082	15069.9	gapdh
51	E3	47	74.1164	527623	15259.3	gapdh
51	E3	48	74.4233	523463	15569.3	gapdh
51	E3	49	74.7302	518879	16002.3	gapdh
51	E3	50	75.0371	513619	16555.7	gapdh
51	E3	51	75.3439	509297	17128.6	gapdh
51	E3	52	75.6508	503470	17608.7	gapdh
51	E3	53	75.9577	496470	17909.2	gapdh
51	E3	54	76.2646	489724	17989.3	gapdh
51	E3	55	76.5714	485073	17864.8	gapdh
51	E3	56	76.8783	478991	17596.5	gapdh
51	E3	57	77.1852	474319	17263.5	gapdh
51	E3	58	77.4921	468408	16935.9	gapdh
51	E3	59	77.7989	463594	16660.7	gapdh
51	E3	60	78.1058	458478	16458.4	gapdh
51	E3	61	78.4127	453774	16328.1	gapdh
51	E3	62	78.7196	448399	16255.1	gapdh
51	E3	63	79.0264	443052	16218.2	gapdh
51	E3	64	79.3333	438761	16197.3	gapdh
51	E3	65	79.6402	432572	16178.7	gapdh
51	E3	66	79.9471	427919	16158	gapdh
51	E3	67	80.2539	423304	16138.2	gapdh
51	E3	68	80.5608	418159	16125.6	gapdh
51	E3	69	80.8677	413183	16127	gapdh
51	E3	70	81.1746	408544	16148.9	gapdh
51	E3	71	81.4814	402577	16201.5	gapdh
51	E3	72	81.7883	398098	16301	gapdh
51	E3	73	82.0952	393563	16470.4	gapdh
51	E3	74	82.4021	388051	16737.7	gapdh
51	E3	75	82.7089	383013	17134.4	gapdh
51	E3	76	83.0158	377714	17695	gapdh
51	E3	77	83.3227	372297	18458.1	gapdh
51	E3	78	83.6296	367107	19468.6	gapdh
51	E3	79	83.9364	361598	20787.4	gapdh
51	E3	80	84.2433	354906	22511.1	gapdh
51	E3	81	84.5502	348060	24793.3	gapdh
51	E3	82	84.8571	339909	27844.8	gapdh
51	E3	83	85.1639	331217	31886.6	gapdh
51	E3	84	85.4708	320075	37055.9	gapdh
51	E3	85	85.7777	307153	43307.5	gapdh
51	E3	86	86.0846	290176	50377	gapdh
51	E3	87	86.3914	268643	57844.9	gapdh
51	E3	88	86.6983	246117	65270.8	gapdh
51	E3	89	87.0052	222628	72305.5	gapdh
51	E3	90	87.3121	198931	78683	gapdh
51	E3	91	87.6189	174443	84076.2	gapdh
51	E3	92	87.9258	147648	87913.9	gapdh
51	E3	93	88.2327	115784	89325.6	gapdh
51	E3	94	88.5396	76234.8	87343.3	gapdh
51	E3	95	88.8464	38732.4	81324.4	gapdh
51	E3	96	89.1533	18387	71384.3	gapdh
51	E3	97	89.4602	12617.3	58562.3	gapdh
51	E3	98	89.7671	11125.2	44579.4	gapdh
51	E3	99	90.0739	11090.5	31291.9	gapdh
51	E3	100	90.3808	10707.3	20124.5	gapdh
51	E3	101	90.6877	10391.1	12109.2	gapdh
51	E3	102	90.9946	9896.56	6940.44	gapdh
51	E3	103	91.3014	10283.3	3814.06	gapdh
51	E3	104	91.6083	9967.68	2108.9	gapdh
51	E3	105	91.9152	9717.28	1265.59	gapdh
51	E3	106	92.2221	9373.65	874.862	gapdh
51	E3	107	92.5289	8948.76	677.939	gapdh
51	E3	108	92.8358	8864.37	526.045	gapdh
51	E3	109	93.1427	9006.61	333.343	gapdh
51	E3	110	93.4496	9191.05	40.8604	gapdh
51	E3	111	93.7564	8788.83	-400.174	gapdh
51	E3	112	94.0633	8358.41	-1023.59	gapdh
51	E3	113	94.3702	8152.78	-1830.49	gapdh
51	E3	114	94.6771	8571.96	-2776.28	gapdh
52	E4	1	60.0002	835100	19825.8	adam8
52	E4	2	60.3071	831076	20030.7	adam8
52	E4	3	60.6139	824466	20237.3	adam8
52	E4	4	60.9208	819469	20417.7	adam8
52	E4	5	61.2277	813440	20563	adam8
52	E4	6	61.5346	807665	20679.4	adam8
52	E4	7	61.8414	800645	20779	adam8
52	E4	8	62.1483	794684	20870.9	adam8
52	E4	9	62.4552	787542	20958.7	adam8
52	E4	10	62.7621	780685	21042.4	adam8
52	E4	11	63.0689	774544	21119.7	adam8
52	E4	12	63.3758	768028	21184.9	adam8
52	E4	13	63.6827	760689	21227.7	adam8
52	E4	14	63.9896	754734	21233.8	adam8
52	E4	15	64.2964	747961	21191.2	adam8
52	E4	16	64.6033	740674	21097.3	adam8
52	E4	17	64.9102	733667	20963.6	adam8
52	E4	18	65.2171	726789	20811.8	adam8
52	E4	19	65.5239	720598	20665.1	adam8
52	E4	20	65.8308	714319	20539	adam8
52	E4	21	66.1377	707404	20436.9	adam8
52	E4	22	66.4446	700716	20354.2	adam8
52	E4	23	66.7514	693766	20284.1	adam8
52	E4	24	67.0583	688425	20220	adam8
52	E4	25	67.3652	681284	20156	adam8
52	E4	26	67.6721	675605	20087	adam8
52	E4	27	67.9789	668156	20011.3	adam8
52	E4	28	68.2858	662995	19933	adam8
52	E4	29	68.5927	655792	19860	adam8
52	E4	30	68.8996	650587	19802.8	adam8
52	E4	31	69.2064	644148	19755.2	adam8
52	E4	32	69.5133	637932	19704.8	adam8
52	E4	33	69.8202	631783	19638	adam8
52	E4	34	70.1271	624453	19547.5	adam8
52	E4	35	70.4339	618426	19436.9	adam8
52	E4	36	70.7408	612644	19316.8	adam8
52	E4	37	71.0477	606198	19196.1	adam8
52	E4	38	71.3546	601294	19074.3	adam8
52	E4	39	71.6614	594497	18942.8	adam8
52	E4	40	71.9683	588342	18793.9	adam8
52	E4	41	72.2752	581938	18630.1	adam8
52	E4	42	72.5821	578013	18467.2	adam8
52	E4	43	72.8889	571425	18331.6	adam8
52	E4	44	73.1958	566004	18255.6	adam8
52	E4	45	73.5027	560456	18276.4	adam8
52	E4	46	73.8096	554270	18433.8	adam8
52	E4	47	74.1164	549214	18760.1	adam8
52	E4	48	74.4233	544079	19261.3	adam8
52	E4	49	74.7302	538444	19904.3	adam8
52	E4	50	75.0371	532312	20660.1	adam8
52	E4	51	75.3439	525713	21340.3	adam8
52	E4	52	75.6508	517212	21824.3	adam8
52	E4	53	75.9577	509416	22040.9	adam8
52	E4	54	76.2646	502676	21987.3	adam8
52	E4	55	76.5714	496328	21719.2	adam8
52	E4	56	76.8783	489538	21320.6	adam8
52	E4	57	77.1852	482285	20873.8	adam8
52	E4	58	77.4921	476381	20439.4	adam8
52	E4	59	77.7989	470353	20051.6	adam8
52	E4	60	78.1058	463992	19731.9	adam8
52	E4	61	78.4127	457950	19477.6	adam8
52	E4	62	78.7196	452184	19258.4	adam8
52	E4	63	79.0264	445312	19065.3	adam8
52	E4	64	79.3333	439939	18898.2	adam8
52	E4	65	79.6402	433925	18766.1	adam8
52	E4	66	79.9471	428271	18684.3	adam8
52	E4	67	80.2539	423144	18672	adam8
52	E4	68	80.5608	417126	18756.8	adam8
52	E4	69	80.8677	410973	18986	adam8
52	E4	70	81.1746	404964	19442.1	adam8
52	E4	71	81.4814	400035	20299.3	adam8
52	E4	72	81.7883	394023	21805.4	adam8
52	E4	73	82.0952	388048	24209.8	adam8
52	E4	74	82.4021	380786	27883.5	adam8
52	E4	75	82.7089	373456	33255	adam8
52	E4	76	83.0158	365134	40726.8	adam8
52	E4	77	83.3227	354441	50509	adam8
52	E4	78	83.6296	342074	62391.7	adam8
52	E4	79	83.9364	325159	75547.4	adam8
52	E4	80	84.2433	302127	88493.8	adam8
52	E4	81	84.5502	265408	99314.2	adam8
52	E4	82	84.8571	214281	106112	adam8
52	E4	83	85.1639	163476	107536	adam8
52	E4	84	85.4708	117104	103158	adam8
52	E4	85	85.7777	83372.2	93567.2	adam8
52	E4	86	86.0846	63486	80184.4	adam8
52	E4	87	86.3914	52261.8	64890.5	adam8
52	E4	88	86.6983	48058.2	49601.2	adam8
52	E4	89	87.0052	46091.1	35885.3	adam8
52	E4	90	87.3121	44361.2	24711	adam8
52	E4	91	87.6189	42298.2	16695	adam8
52	E4	92	87.9258	40463.4	11473.8	adam8
52	E4	93	88.2327	38029.2	8083.45	adam8
52	E4	94	88.5396	37421.6	5949.02	adam8
52	E4	95	88.8464	36491.1	4592.89	adam8
52	E4	96	89.1533	35614	3691.86	adam8
52	E4	97	89.4602	35246.4	3058.95	adam8
52	E4	98	89.7671	34517.5	2594.73	adam8
52	E4	99	90.0739	33465.7	2244.14	adam8
52	E4	100	90.3808	33387.8	1972.03	adam8
52	E4	101	90.6877	32820.1	1753.95	adam8
52	E4	102	90.9946	32661.6	1573.23	adam8
52	E4	103	91.3014	31856.6	1419.35	adam8
52	E4	104	91.6083	31428.1	1286.69	adam8
52	E4	105	91.9152	31535.2	1173.95	adam8
52	E4	106	92.2221	31131.8	1083.25	adam8
52	E4	107	92.5289	30570.1	1017.61	adam8
52	E4	108	92.8358	30683.9	976.889	adam8
52	E4	109	93.1427	30604.4	954.182	adam8
52	E4	110	93.4496	29749.2	935.469	adam8
52	E4	111	93.7564	29421.9	903.693	adam8
52	E4	112	94.0633	29158.8	845.859	adam8
52	E4	113	94.3702	29030	759.029	adam8
52	E4	114	94.6771	29212.5	651.252	adam8
53	E5	1	60.0002	676141	15730.4	adam8
53	E5	2	60.3074	673576	15866.9	adam8
53	E5	3	60.6145	668666	16009.7	adam8
53	E5	4	60.9217	664382	16135.4	adam8
53	E5	5	61.2289	659450	16231.3	adam8
53	E5	6	61.536	654400	16296.9	adam8
53	E5	7	61.8432	649492	16343.5	adam8
53	E5	8	62.1504	644453	16380.1	adam8
53	E5	9	62.4575	638748	16408.1	adam8
53	E5	10	62.7647	633634	16423	adam8
53	E5	11	63.0719	628721	16420.3	adam8
53	E5	12	63.379	623439	16400.4	adam8
53	E5	13	63.6862	616946	16369.4	adam8
53	E5	14	63.9934	613234	16334.4	adam8
53	E5	15	64.3005	607892	16297.7	adam8
53	E5	16	64.6077	602174	16254.9	adam8
53	E5	17	64.9149	597577	16199.5	adam8
53	E5	18	65.222	591165	16129.1	adam8
53	E5	19	65.5292	586325	16049.8	adam8
53	E5	20	65.8364	581386	15971.4	adam8
53	E5	21	66.1435	576227	15899	adam8
53	E5	22	66.4507	571324	15836.3	adam8
53	E5	23	66.7579	565739	15784	adam8
53	E5	24	67.065	560379	15744.6	adam8
53	E5	25	67.3722	556558	15722.5	adam8
53	E5	26	67.6794	550554	15721.6	adam8
53	E5	27	67.9865	546319	15740.7	adam8
53	E5	28	68.2937	541241	15770.8	adam8
53	E5	29	68.6009	535853	15797.3	adam8
53	E5	30	68.908	531463	15804.2	adam8
53	E5	31	69.2152	526009	15780.4	adam8
53	E5	32	69.5224	520645	15722.6	adam8
53	E5	33	69.8295	515985	15636	adam8
53	E5	34	70.1367	510531	15530	adam8
53	E5	35	70.4439	505984	15413.3	adam8
53	E5	36	70.751	501037	15291.8	adam8
53	E5	37	71.0582	495768	15168.2	adam8
53	E5	38	71.3654	491168	15045.9	adam8
53	E5	39	71.6725	486549	14930.4	adam8
53	E5	40	71.9797	482326	14829.8	adam8
53	E5	41	72.2869	477190	14752.1	adam8
53	E5	42	72.594	473096	14705.4	adam8
53	E5	43	72.9012	468386	14701.2	adam8
53	E5	44	73.2084	463938	14760	adam8
53	E5	45	73.5155	459028	14916.3	adam8
53	E5	46	73.8227	454173	15214.4	adam8
53	E5	47	74.1299	450460	15691	adam8
53	E5	48	74.437	445586	16361.7	adam8
53	E5	49	74.7442	440999	17185.5	adam8
53	E5	50	75.0514	436360	18032.2	adam8
53	E5	51	75.3585	428970	18757.3	adam8
53	E5	52	75.6657	420955	19235.2	adam8
53	E5	53	75.9729	414758	19404.4	adam8
53	E5	54	76.28	408725	19284.5	adam8
53	E5	55	76.5872	402921	18959.7	adam8
53	E5	56	76.8944	397344	18539.4	adam8
53	E5	57	77.2015	391516	18119.2	adam8
53	E5	58	77.5087	386082	17758.8	adam8
53	E5	59	77.8159	381059	17478.1	adam8
53	E5	60	78.123	375278	17266.1	adam8
53	E5	61	78.4302	370326	17095.3	adam8
53	E5	62	78.7374	363912	16935.8	adam8
53	E5	63	79.0445	359483	16766.3	adam8
53	E5	64	79.3517	353552	16580.6	adam8
53	E5	65	79.6589	348613	16390.4	adam8
53	E5	66	79.966	343628	16222.3	adam8
53	E5	67	80.2732	338832	16115.4	adam8
53	E5	68	80.5804	334118	16119	adam8
53	E5	69	80.8875	329005	16295.3	adam8
53	E5	70	81.1947	324728	16728.1	adam8
53	E5	71	81.5019	318962	17537.3	adam8
53	E5	72	81.809	314152	18898.5	adam8
53	E5	73	82.1162	308937	21059.6	adam8
53	E5	74	82.4234	302703	24342.4	adam8
53	E5	75	82.7305	296282	29107.8	adam8
53	E5	76	83.0377	288131	35664	adam8
53	E5	77	83.3449	278953	44107.9	adam8
53	E5	78	83.652	266642	54134.2	adam8
53	E5	79	83.9592	249949	64895.1	adam8
53	E5	80	84.2664	225791	75019.3	adam8
53	E5	81	84.5735	189406	82859.5	adam8
53	E5	82	84.8807	144550	86918.7	adam8
53	E5	83	85.1879	104106	86296.9	adam8
53	E5	84	85.495	69546.9	80962.3	adam8
53	E5	85	85.8022	47788.7	71738.2	adam8
53	E5	86	86.1094	35302.6	60036.6	adam8
53	E5	87	86.4165	29515.1	47472.5	adam8
53	E5	88	86.7237	26755.5	35498.4	adam8
53	E5	89	87.0309	25219.9	25153.9	adam8
53	E5	90	87.338	24150.8	16963.5	adam8
53	E5	91	87.6452	22655.4	11187.5	adam8
53	E5	92	87.9524	21807.9	7285.72	adam8
53	E5	93	88.2595	21380.7	4797.19	adam8
53	E5	94	88.5667	20902.7	3291.37	adam8
53	E5	95	88.8739	20657	2414.77	adam8
53	E5	96	89.181	20109.1	1913.7	adam8
53	E5	97	89.4882	18864.1	1621.28	adam8
53	E5	98	89.7953	18894.7	1434.09	adam8
53	E5	99	90.1025	18595.1	1291.97	adam8
53	E5	100	90.4097	18402.7	1163.25	adam8
53	E5	101	90.7169	17670.7	1034.26	adam8
53	E5	102	91.024	17233.9	902.56	adam8
53	E5	103	91.3312	17356.2	773.637	adam8
53	E5	104	91.6384	17013.6	658.212	adam8
53	E5	105	91.9455	17205	567.816	adam8
53	E5	106	92.2527	17052.8	508.691	adam8
53	E5	107	92.5599	16428.3	477.492	adam8
53	E5	108	92.867	16186.7	461.867	adam8
53	E5	109	93.1742	16341.4	445.58	adam8
53	E5	110	93.4814	16151.8	414.745	adam8
53	E5	111	93.7885	15410.6	361.928	adam8
53	E5	112	94.0957	15857.2	287.093	adam8
53	E5	113	94.4028	15492.8	196.23	adam8
53	E5	114	94.71	15808.7	98.5576	adam8
54	E6	1	60.0002	768075	17060.6	adam8
54	E6	2	60.3074	765376	17229.3	adam8
54	E6	3	60.6145	760650	17405.4	adam8
54	E6	4	60.9217	755152	17552.7	adam8
54	E6	5	61.2289	750164	17648.1	adam8
54	E6	6	61.536	744576	17687.9	adam8
54	E6	7	61.8432	739431	17687.2	adam8
54	E6	8	62.1504	733468	17667.9	adam8
54	E6	9	62.4575	727325	17650	adam8
54	E6	10	62.7647	722525	17645.7	adam8
54	E6	11	63.0719	716726	17656.8	adam8
54	E6	12	63.379	711203	17677	adam8
54	E6	13	63.6862	705912	17696.7	adam8
54	E6	14	63.9934	699572	17708.3	adam8
54	E6	15	64.3005	694234	17707.7	adam8
54	E6	16	64.6077	688629	17693.5	adam8
54	E6	17	64.9149	682931	17662.9	adam8
54	E6	18	65.222	677171	17609.8	adam8
54	E6	19	65.5292	671301	17527.9	adam8
[truncated: 779 more rows]

## Sheet: Melt Curve Result
Block Type	96-Well 0.2-mL Block
Calibration Background is expired	No
Calibration Background performed on	09-10-2018
Calibration Pure Dye ABY is expired	No
Calibration Pure Dye ABY performed on	09-10-2018
Calibration Pure Dye FAM is expired	No
Calibration Pure Dye FAM performed on	09-10-2018
Calibration Pure Dye JUN is expired	No
Calibration Pure Dye JUN performed on	09-10-2018
Calibration Pure Dye NED is expired	No
Calibration Pure Dye NED performed on	09-10-2018
Calibration Pure Dye ROX is expired	No
Calibration Pure Dye ROX performed on	09-10-2018
Calibration Pure Dye SYBR is expired	No
Calibration Pure Dye SYBR performed on	09-10-2018
Calibration Pure Dye TAMRA is expired	No
Calibration Pure Dye TAMRA performed on	09-10-2018
Calibration Pure Dye VIC is expired	No
Calibration Pure Dye VIC performed on	09-10-2018
Calibration ROI is expired	No
Calibration ROI performed on	09-10-2018
Calibration Uniformity is expired	No
Calibration Uniformity performed on	09-10-2018
Chemistry	SYBR_GREEN
Date Created	2021-10-21 14:55:05 PM CST
Experiment Barcode
Experiment Comment
Experiment File Name	E:\zyf\1AAA 实验相关\实验相关\实验数据\qPCR\2019-12-15_zyf 验证小干扰.eds
Experiment Name	2019-12-15_zyf
Experiment Run End Time	2019-12-15 13:10:59 PM CST
Experiment Type	Comparative Cт (ΔΔCт)
Instrument Name	272322851
Instrument Serial Number	272322851
Instrument Type	QuantStudio™ 3 System
Passive Reference	ROX
Post-read Stage/Step
Pre-read Stage/Step
Quantification Cycle Method	Ct
Signal Smoothing On	true
Stage where Melt Analysis is performed	Stage3
Stage/ Cycle where Ct Analysis is performed	Stage2, Step2
User Name
Well	Well Position	Sample	Target Name	Tm	Melt Peak Height
1	A1	SCR	gapdh	88.3889	72933.5
2	A2	SCR	gapdh	88.5424	88740.7
3	A3	SCR	gapdh	88.5396	104145
4	A4	SCR	adam8	85.4708	98536.1
5	A5	SCR	adam8	85.3414	94171.3
6	A6	SCR	adam8	85.1879	75595.5
25	C1	si1	gapdh	86.3941	48798.1
26	C2	si1	gapdh	86.701	97247.7
27	C3	si1	gapdh	85.7777	59831.6
28	C4	si1	adam8	85.3174	132427
29	C5	si1	adam8	85.0343	106883
30	C6	si1	adam8	85.0343	94100.4
49	E1	si2	gapdh	88.082	74910.4
50	E2	si2	gapdh	87.9286	93182.4
51	E3	si2	gapdh	88.2327	89325.6
52	E4	si2	adam8	85.0105	107547
53	E5	si2	adam8	85.0343	87216.6
54	E6	si2	adam8	85.0343	86528.9
73	G1	si3	gapdh	87.7751	80586.3
74	G2	si3	gapdh	87.7751	75262.3
75	G3	si3	gapdh	88.2327	82474.5
76	G4	si3	adam8	85.3174	88725.4
77	G5	si3	adam8	85.3414	101103
78	G6	si3	adam8	85.1879	118254
