# Supplementary material for: ADAMTS8 Promotes Cardiac Fibrosis Partly Through Activating EGFR Dependent Pathway
Source: Frontiers journal article supplement (doi:10.3389/fcvm.2022.797137), 2022-02-10
Supplement: Table_2.XLS [file Table_2.XLS]

## Sheet: Sample Setup
Block Type	96-Well 0.2-mL Block
Calibration Background is expired	No
Calibration Background performed on	09-11-2020
Calibration Pure Dye ABY is expired	No
Calibration Pure Dye ABY performed on	09-11-2020
Calibration Pure Dye FAM is expired	No
Calibration Pure Dye FAM performed on	09-11-2020
Calibration Pure Dye JUN is expired	No
Calibration Pure Dye JUN performed on	09-11-2020
Calibration Pure Dye NED is expired	No
Calibration Pure Dye NED performed on	09-11-2020
Calibration Pure Dye ROX is expired	No
Calibration Pure Dye ROX performed on	09-11-2020
Calibration Pure Dye SYBR is expired	No
Calibration Pure Dye SYBR performed on	09-11-2020
Calibration Pure Dye TAMRA is expired	No
Calibration Pure Dye TAMRA performed on	09-11-2020
Calibration Pure Dye VIC is expired	No
Calibration Pure Dye VIC performed on	09-11-2020
Calibration ROI is expired	No
Calibration ROI performed on	09-11-2020
Calibration Uniformity is expired	No
Calibration Uniformity performed on	09-11-2020
Chemistry	SYBR_GREEN
Date Created	2021-10-22 09:44:06 AM CST
Experiment Barcode
Experiment Comment
Experiment File Name	C:\Users\Leya-zha\Desktop\A 文章 ADAMTS8在心脏纤维化中的作用\Figure6 ADAMTS8通过MAPK通路和PI3K-AKT通路\转病毒后NOX4 2020-10-01_ZYF.eds
Experiment Name	2020-10-01_ZYF
Experiment Run End Time	2020-10-01 18:41:23 PM CST
Experiment Type	Comparative Cт (ΔΔCт)
Instrument Name	272322851
Instrument Serial Number	272322851
Instrument Type	QuantStudio™ 3 System
Passive Reference	ROX
Post-read Stage/Step
Pre-read Stage/Step
Quantification Cycle Method	Ct
Signal Smoothing On	true
Stage where Melt Analysis is performed	Stage3
Stage/ Cycle where Ct Analysis is performed	Stage2, Step2
User Name
Well	Well Position	Sample Name	Sample Color	Biogroup Name	Biogroup Color	Target Name	Target Color	Task	Reporter	Quencher	Quantity	Comments
1	A1
2	A2
3	A3
4	A4
5	A5
6	A6
7	A7
8	A8
9	A9
10	A10
11	A11
12	A12
13	B1
14	B2
15	B3
16	B4
17	B5
18	B6
19	B7
20	B8
21	B9
22	B10
23	B11
24	B12
25	C1
26	C2
27	C3
28	C4
29	C5
30	C6
31	C7	AD-v	RGB(0,139,69)			collage3	RGB(0,139,69)	UNKNOWN	SYBR	None
32	C8	AD-v	RGB(0,139,69)			collage3	RGB(0,139,69)	UNKNOWN	SYBR	None
33	C9	AD-v	RGB(0,139,69)			collage3	RGB(0,139,69)	UNKNOWN	SYBR	None
34	C10	Ad-ADAMTS8	RGB(255,127,0)			collage3	RGB(0,139,69)	UNKNOWN	SYBR	None
35	C11	Ad-ADAMTS8	RGB(255,127,0)			collage3	RGB(0,139,69)	UNKNOWN	SYBR	None
36	C12	Ad-ADAMTS8	RGB(255,127,0)			collage3	RGB(0,139,69)	UNKNOWN	SYBR	None
37	D1
38	D2
39	D3
40	D4
41	D5
42	D6
43	D7	AD-v	RGB(0,139,69)			ctgf	RGB(238,238,0)	UNKNOWN	SYBR	None
44	D8	AD-v	RGB(0,139,69)			ctgf	RGB(238,238,0)	UNKNOWN	SYBR	None
45	D9	AD-v	RGB(0,139,69)			ctgf	RGB(238,238,0)	UNKNOWN	SYBR	None
46	D10	Ad-ADAMTS8	RGB(255,127,0)			ctgf	RGB(238,238,0)	UNKNOWN	SYBR	None
47	D11	Ad-ADAMTS8	RGB(255,127,0)			ctgf	RGB(238,238,0)	UNKNOWN	SYBR	None
48	D12	Ad-ADAMTS8	RGB(255,127,0)			ctgf	RGB(238,238,0)	UNKNOWN	SYBR	None
49	E1
50	E2
51	E3
52	E4
53	E5
54	E6
55	E7	AD-v	RGB(0,139,69)			actin	RGB(139,137,112)	UNKNOWN	SYBR	None
56	E8	AD-v	RGB(0,139,69)			actin	RGB(139,137,112)	UNKNOWN	SYBR	None
57	E9	AD-v	RGB(0,139,69)			actin	RGB(139,137,112)	UNKNOWN	SYBR	None
58	E10	Ad-ADAMTS8	RGB(255,127,0)			actin	RGB(139,137,112)	UNKNOWN	SYBR	None
59	E11	Ad-ADAMTS8	RGB(255,127,0)			actin	RGB(139,137,112)	UNKNOWN	SYBR	None
60	E12	Ad-ADAMTS8	RGB(255,127,0)			actin	RGB(139,137,112)	UNKNOWN	SYBR	None
61	F1
62	F2
63	F3
64	F4
65	F5
66	F6
67	F7	AD-v	RGB(0,139,69)			adam8	RGB(238,121,66)	UNKNOWN	SYBR	None
68	F8	AD-v	RGB(0,139,69)			adam8	RGB(238,121,66)	UNKNOWN	SYBR	None
69	F9	AD-v	RGB(0,139,69)			adam8	RGB(238,121,66)	UNKNOWN	SYBR	None
70	F10	Ad-ADAMTS8	RGB(255,127,0)			adam8	RGB(238,121,66)	UNKNOWN	SYBR	None
71	F11	Ad-ADAMTS8	RGB(255,127,0)			adam8	RGB(238,121,66)	UNKNOWN	SYBR	None
72	F12	Ad-ADAMTS8	RGB(255,127,0)			adam8	RGB(238,121,66)	UNKNOWN	SYBR	None
73	G1
74	G2
75	G3
76	G4
77	G5
78	G6
79	G7	AD-v	RGB(0,139,69)			nox4	RGB(142,56,142)	UNKNOWN	SYBR	None
80	G8	AD-v	RGB(0,139,69)			nox4	RGB(142,56,142)	UNKNOWN	SYBR	None
81	G9	AD-v	RGB(0,139,69)			nox4	RGB(142,56,142)	UNKNOWN	SYBR	None
82	G10	Ad-ADAMTS8	RGB(255,127,0)			nox4	RGB(142,56,142)	UNKNOWN	SYBR	None
83	G11	Ad-ADAMTS8	RGB(255,127,0)			nox4	RGB(142,56,142)	UNKNOWN	SYBR	None
84	G12	Ad-ADAMTS8	RGB(255,127,0)			nox4	RGB(142,56,142)	UNKNOWN	SYBR	None
85	H1
86	H2
87	H3
88	H4
89	H5
90	H6
91	H7	AD-v	RGB(0,139,69)			lox	RGB(198,113,113)	UNKNOWN	SYBR	None
92	H8	AD-v	RGB(0,139,69)			lox	RGB(198,113,113)	UNKNOWN	SYBR	None
93	H9	AD-v	RGB(0,139,69)			lox	RGB(198,113,113)	UNKNOWN	SYBR	None
94	H10	Ad-ADAMTS8	RGB(255,127,0)			lox	RGB(198,113,113)	UNKNOWN	SYBR	None
95	H11	Ad-ADAMTS8	RGB(255,127,0)			lox	RGB(198,113,113)	UNKNOWN	SYBR	None
96	H12	Ad-ADAMTS8	RGB(255,127,0)			lox	RGB(198,113,113)	UNKNOWN	SYBR	None

## Sheet: Amplification Data
Block Type	96-Well 0.2-mL Block
Calibration Background is expired	No
Calibration Background performed on	09-11-2020
Calibration Pure Dye ABY is expired	No
Calibration Pure Dye ABY performed on	09-11-2020
Calibration Pure Dye FAM is expired	No
Calibration Pure Dye FAM performed on	09-11-2020
Calibration Pure Dye JUN is expired	No
Calibration Pure Dye JUN performed on	09-11-2020
Calibration Pure Dye NED is expired	No
Calibration Pure Dye NED performed on	09-11-2020
Calibration Pure Dye ROX is expired	No
Calibration Pure Dye ROX performed on	09-11-2020
Calibration Pure Dye SYBR is expired	No
Calibration Pure Dye SYBR performed on	09-11-2020
Calibration Pure Dye TAMRA is expired	No
Calibration Pure Dye TAMRA performed on	09-11-2020
Calibration Pure Dye VIC is expired	No
Calibration Pure Dye VIC performed on	09-11-2020
Calibration ROI is expired	No
Calibration ROI performed on	09-11-2020
Calibration Uniformity is expired	No
Calibration Uniformity performed on	09-11-2020
Chemistry	SYBR_GREEN
Date Created	2021-10-22 09:44:06 AM CST
Experiment Barcode
Experiment Comment
Experiment File Name	C:\Users\Leya-zha\Desktop\A 文章 ADAMTS8在心脏纤维化中的作用\Figure6 ADAMTS8通过MAPK通路和PI3K-AKT通路\转病毒后NOX4 2020-10-01_ZYF.eds
Experiment Name	2020-10-01_ZYF
Experiment Run End Time	2020-10-01 18:41:23 PM CST
Experiment Type	Comparative Cт (ΔΔCт)
Instrument Name	272322851
Instrument Serial Number	272322851
Instrument Type	QuantStudio™ 3 System
Passive Reference	ROX
Post-read Stage/Step
Pre-read Stage/Step
Quantification Cycle Method	Ct
Signal Smoothing On	true
Stage where Melt Analysis is performed	Stage3
Stage/ Cycle where Ct Analysis is performed	Stage2, Step2
User Name
Well	Well Position	Cycle	Target Name	Rn	Delta Rn
1	A1	1
1	A1	2
1	A1	3
1	A1	4
1	A1	5
1	A1	6
1	A1	7
1	A1	8
1	A1	9
1	A1	10
1	A1	11
1	A1	12
1	A1	13
1	A1	14
1	A1	15
1	A1	16
1	A1	17
1	A1	18
1	A1	19
1	A1	20
1	A1	21
1	A1	22
1	A1	23
1	A1	24
1	A1	25
1	A1	26
1	A1	27
1	A1	28
1	A1	29
1	A1	30
1	A1	31
1	A1	32
1	A1	33
1	A1	34
1	A1	35
1	A1	36
1	A1	37
1	A1	38
1	A1	39
1	A1	40
2	A2	1
2	A2	2
2	A2	3
2	A2	4
2	A2	5
2	A2	6
2	A2	7
2	A2	8
2	A2	9
2	A2	10
2	A2	11
2	A2	12
2	A2	13
2	A2	14
2	A2	15
2	A2	16
2	A2	17
2	A2	18
2	A2	19
2	A2	20
2	A2	21
2	A2	22
2	A2	23
2	A2	24
2	A2	25
2	A2	26
2	A2	27
2	A2	28
2	A2	29
2	A2	30
2	A2	31
2	A2	32
2	A2	33
2	A2	34
2	A2	35
2	A2	36
2	A2	37
2	A2	38
2	A2	39
2	A2	40
3	A3	1
3	A3	2
3	A3	3
3	A3	4
3	A3	5
3	A3	6
3	A3	7
3	A3	8
3	A3	9
3	A3	10
3	A3	11
3	A3	12
3	A3	13
3	A3	14
3	A3	15
3	A3	16
3	A3	17
3	A3	18
3	A3	19
3	A3	20
3	A3	21
3	A3	22
3	A3	23
3	A3	24
3	A3	25
3	A3	26
3	A3	27
3	A3	28
3	A3	29
3	A3	30
3	A3	31
3	A3	32
3	A3	33
3	A3	34
3	A3	35
3	A3	36
3	A3	37
3	A3	38
3	A3	39
3	A3	40
4	A4	1
4	A4	2
4	A4	3
4	A4	4
4	A4	5
4	A4	6
4	A4	7
4	A4	8
4	A4	9
4	A4	10
4	A4	11
4	A4	12
4	A4	13
4	A4	14
4	A4	15
4	A4	16
4	A4	17
4	A4	18
4	A4	19
4	A4	20
4	A4	21
4	A4	22
4	A4	23
4	A4	24
4	A4	25
4	A4	26
4	A4	27
4	A4	28
4	A4	29
4	A4	30
4	A4	31
4	A4	32
4	A4	33
4	A4	34
4	A4	35
4	A4	36
4	A4	37
4	A4	38
4	A4	39
4	A4	40
5	A5	1
5	A5	2
5	A5	3
5	A5	4
5	A5	5
5	A5	6
5	A5	7
5	A5	8
5	A5	9
5	A5	10
5	A5	11
5	A5	12
5	A5	13
5	A5	14
5	A5	15
5	A5	16
5	A5	17
5	A5	18
5	A5	19
5	A5	20
5	A5	21
5	A5	22
5	A5	23
5	A5	24
5	A5	25
5	A5	26
5	A5	27
5	A5	28
5	A5	29
5	A5	30
5	A5	31
5	A5	32
5	A5	33
5	A5	34
5	A5	35
5	A5	36
5	A5	37
5	A5	38
5	A5	39
5	A5	40
6	A6	1
6	A6	2
6	A6	3
6	A6	4
6	A6	5
6	A6	6
6	A6	7
6	A6	8
6	A6	9
6	A6	10
6	A6	11
6	A6	12
6	A6	13
6	A6	14
6	A6	15
6	A6	16
6	A6	17
6	A6	18
6	A6	19
6	A6	20
6	A6	21
6	A6	22
6	A6	23
6	A6	24
6	A6	25
6	A6	26
6	A6	27
6	A6	28
6	A6	29
6	A6	30
6	A6	31
6	A6	32
6	A6	33
6	A6	34
6	A6	35
6	A6	36
6	A6	37
6	A6	38
6	A6	39
6	A6	40
7	A7	1
7	A7	2
7	A7	3
7	A7	4
7	A7	5
7	A7	6
7	A7	7
7	A7	8
7	A7	9
7	A7	10
7	A7	11
7	A7	12
7	A7	13
7	A7	14
7	A7	15
7	A7	16
7	A7	17
7	A7	18
7	A7	19
7	A7	20
7	A7	21
7	A7	22
7	A7	23
7	A7	24
7	A7	25
7	A7	26
7	A7	27
7	A7	28
7	A7	29
7	A7	30
7	A7	31
7	A7	32
7	A7	33
7	A7	34
7	A7	35
7	A7	36
7	A7	37
7	A7	38
7	A7	39
7	A7	40
8	A8	1
8	A8	2
8	A8	3
8	A8	4
8	A8	5
8	A8	6
8	A8	7
8	A8	8
8	A8	9
8	A8	10
8	A8	11
8	A8	12
8	A8	13
8	A8	14
8	A8	15
8	A8	16
8	A8	17
8	A8	18
8	A8	19
8	A8	20
8	A8	21
8	A8	22
8	A8	23
8	A8	24
8	A8	25
8	A8	26
8	A8	27
8	A8	28
8	A8	29
8	A8	30
8	A8	31
8	A8	32
8	A8	33
8	A8	34
8	A8	35
8	A8	36
8	A8	37
8	A8	38
8	A8	39
8	A8	40
9	A9	1
9	A9	2
9	A9	3
9	A9	4
9	A9	5
9	A9	6
9	A9	7
9	A9	8
9	A9	9
9	A9	10
9	A9	11
9	A9	12
9	A9	13
9	A9	14
9	A9	15
9	A9	16
9	A9	17
9	A9	18
9	A9	19
9	A9	20
9	A9	21
9	A9	22
9	A9	23
9	A9	24
9	A9	25
9	A9	26
9	A9	27
9	A9	28
9	A9	29
9	A9	30
9	A9	31
9	A9	32
9	A9	33
9	A9	34
9	A9	35
9	A9	36
9	A9	37
9	A9	38
9	A9	39
9	A9	40
10	A10	1
10	A10	2
10	A10	3
10	A10	4
10	A10	5
10	A10	6
10	A10	7
10	A10	8
10	A10	9
10	A10	10
10	A10	11
10	A10	12
10	A10	13
10	A10	14
10	A10	15
10	A10	16
10	A10	17
10	A10	18
10	A10	19
10	A10	20
10	A10	21
10	A10	22
10	A10	23
10	A10	24
10	A10	25
10	A10	26
10	A10	27
10	A10	28
10	A10	29
10	A10	30
10	A10	31
10	A10	32
10	A10	33
10	A10	34
10	A10	35
10	A10	36
10	A10	37
10	A10	38
10	A10	39
10	A10	40
11	A11	1
11	A11	2
11	A11	3
11	A11	4
11	A11	5
11	A11	6
11	A11	7
11	A11	8
11	A11	9
11	A11	10
11	A11	11
11	A11	12
11	A11	13
11	A11	14
11	A11	15
11	A11	16
11	A11	17
11	A11	18
11	A11	19
11	A11	20
11	A11	21
11	A11	22
11	A11	23
11	A11	24
11	A11	25
11	A11	26
11	A11	27
11	A11	28
11	A11	29
11	A11	30
11	A11	31
11	A11	32
11	A11	33
11	A11	34
11	A11	35
11	A11	36
11	A11	37
11	A11	38
11	A11	39
11	A11	40
12	A12	1
12	A12	2
12	A12	3
12	A12	4
12	A12	5
12	A12	6
12	A12	7
12	A12	8
12	A12	9
12	A12	10
12	A12	11
12	A12	12
12	A12	13
12	A12	14
12	A12	15
12	A12	16
12	A12	17
12	A12	18
12	A12	19
12	A12	20
12	A12	21
12	A12	22
12	A12	23
12	A12	24
12	A12	25
12	A12	26
12	A12	27
12	A12	28
12	A12	29
12	A12	30
12	A12	31
12	A12	32
12	A12	33
12	A12	34
12	A12	35
12	A12	36
12	A12	37
12	A12	38
12	A12	39
12	A12	40
13	B1	1
13	B1	2
13	B1	3
13	B1	4
13	B1	5
13	B1	6
13	B1	7
13	B1	8
13	B1	9
13	B1	10
13	B1	11
13	B1	12
13	B1	13
13	B1	14
13	B1	15
13	B1	16
13	B1	17
13	B1	18
13	B1	19
13	B1	20
13	B1	21
13	B1	22
13	B1	23
13	B1	24
13	B1	25
13	B1	26
13	B1	27
13	B1	28
13	B1	29
13	B1	30
13	B1	31
13	B1	32
13	B1	33
13	B1	34
13	B1	35
13	B1	36
13	B1	37
13	B1	38
13	B1	39
13	B1	40
14	B2	1
14	B2	2
14	B2	3
14	B2	4
14	B2	5
14	B2	6
14	B2	7
14	B2	8
14	B2	9
14	B2	10
14	B2	11
14	B2	12
14	B2	13
14	B2	14
14	B2	15
14	B2	16
14	B2	17
14	B2	18
14	B2	19
14	B2	20
14	B2	21
14	B2	22
14	B2	23
14	B2	24
14	B2	25
14	B2	26
14	B2	27
14	B2	28
14	B2	29
14	B2	30
14	B2	31
14	B2	32
14	B2	33
14	B2	34
14	B2	35
14	B2	36
14	B2	37
14	B2	38
14	B2	39
14	B2	40
15	B3	1
15	B3	2
15	B3	3
15	B3	4
15	B3	5
15	B3	6
15	B3	7
15	B3	8
15	B3	9
15	B3	10
15	B3	11
15	B3	12
15	B3	13
15	B3	14
15	B3	15
15	B3	16
15	B3	17
15	B3	18
15	B3	19
15	B3	20
15	B3	21
15	B3	22
15	B3	23
15	B3	24
15	B3	25
15	B3	26
15	B3	27
15	B3	28
15	B3	29
15	B3	30
15	B3	31
15	B3	32
15	B3	33
15	B3	34
15	B3	35
15	B3	36
15	B3	37
15	B3	38
15	B3	39
15	B3	40
16	B4	1
16	B4	2
16	B4	3
16	B4	4
16	B4	5
16	B4	6
16	B4	7
16	B4	8
16	B4	9
16	B4	10
16	B4	11
16	B4	12
16	B4	13
16	B4	14
16	B4	15
16	B4	16
16	B4	17
16	B4	18
16	B4	19
16	B4	20
16	B4	21
16	B4	22
16	B4	23
16	B4	24
16	B4	25
16	B4	26
16	B4	27
16	B4	28
16	B4	29
16	B4	30
16	B4	31
16	B4	32
16	B4	33
16	B4	34
16	B4	35
16	B4	36
16	B4	37
16	B4	38
16	B4	39
16	B4	40
17	B5	1
17	B5	2
17	B5	3
17	B5	4
17	B5	5
17	B5	6
17	B5	7
17	B5	8
17	B5	9
17	B5	10
17	B5	11
17	B5	12
17	B5	13
17	B5	14
17	B5	15
17	B5	16
17	B5	17
17	B5	18
17	B5	19
17	B5	20
17	B5	21
17	B5	22
17	B5	23
17	B5	24
17	B5	25
17	B5	26
17	B5	27
17	B5	28
17	B5	29
17	B5	30
17	B5	31
17	B5	32
17	B5	33
17	B5	34
17	B5	35
17	B5	36
17	B5	37
17	B5	38
17	B5	39
17	B5	40
18	B6	1
18	B6	2
18	B6	3
18	B6	4
18	B6	5
18	B6	6
18	B6	7
18	B6	8
18	B6	9
18	B6	10
18	B6	11
18	B6	12
18	B6	13
18	B6	14
18	B6	15
18	B6	16
18	B6	17
18	B6	18
18	B6	19
18	B6	20
18	B6	21
18	B6	22
18	B6	23
18	B6	24
18	B6	25
18	B6	26
18	B6	27
18	B6	28
18	B6	29
18	B6	30
18	B6	31
18	B6	32
18	B6	33
18	B6	34
18	B6	35
18	B6	36
18	B6	37
18	B6	38
18	B6	39
18	B6	40
19	B7	1
19	B7	2
19	B7	3
19	B7	4
19	B7	5
19	B7	6
19	B7	7
19	B7	8
19	B7	9
19	B7	10
19	B7	11
19	B7	12
19	B7	13
19	B7	14
19	B7	15
19	B7	16
19	B7	17
19	B7	18
19	B7	19
19	B7	20
19	B7	21
19	B7	22
19	B7	23
19	B7	24
19	B7	25
19	B7	26
19	B7	27
19	B7	28
19	B7	29
19	B7	30
19	B7	31
19	B7	32
19	B7	33
19	B7	34
19	B7	35
19	B7	36
19	B7	37
19	B7	38
19	B7	39
19	B7	40
20	B8	1
20	B8	2
20	B8	3
20	B8	4
20	B8	5
20	B8	6
20	B8	7
20	B8	8
20	B8	9
20	B8	10
20	B8	11
20	B8	12
20	B8	13
20	B8	14
20	B8	15
20	B8	16
20	B8	17
20	B8	18
20	B8	19
20	B8	20
20	B8	21
20	B8	22
20	B8	23
20	B8	24
20	B8	25
20	B8	26
20	B8	27
20	B8	28
20	B8	29
20	B8	30
20	B8	31
20	B8	32
20	B8	33
20	B8	34
20	B8	35
20	B8	36
20	B8	37
20	B8	38
20	B8	39
20	B8	40
21	B9	1
21	B9	2
21	B9	3
21	B9	4
21	B9	5
21	B9	6
21	B9	7
21	B9	8
21	B9	9
21	B9	10
21	B9	11
21	B9	12
21	B9	13
21	B9	14
21	B9	15
21	B9	16
21	B9	17
21	B9	18
21	B9	19
21	B9	20
21	B9	21
21	B9	22
21	B9	23
21	B9	24
21	B9	25
21	B9	26
21	B9	27
21	B9	28
21	B9	29
21	B9	30
21	B9	31
21	B9	32
21	B9	33
21	B9	34
21	B9	35
21	B9	36
21	B9	37
21	B9	38
21	B9	39
21	B9	40
22	B10	1
22	B10	2
22	B10	3
22	B10	4
22	B10	5
22	B10	6
22	B10	7
22	B10	8
22	B10	9
22	B10	10
22	B10	11
22	B10	12
22	B10	13
22	B10	14
22	B10	15
22	B10	16
22	B10	17
22	B10	18
22	B10	19
22	B10	20
22	B10	21
22	B10	22
22	B10	23
22	B10	24
22	B10	25
22	B10	26
22	B10	27
22	B10	28
22	B10	29
22	B10	30
22	B10	31
22	B10	32
22	B10	33
22	B10	34
22	B10	35
22	B10	36
22	B10	37
22	B10	38
22	B10	39
22	B10	40
23	B11	1
23	B11	2
23	B11	3
23	B11	4
23	B11	5
23	B11	6
23	B11	7
23	B11	8
23	B11	9
23	B11	10
23	B11	11
23	B11	12
23	B11	13
23	B11	14
23	B11	15
23	B11	16
23	B11	17
23	B11	18
23	B11	19
23	B11	20
23	B11	21
23	B11	22
23	B11	23
23	B11	24
23	B11	25
23	B11	26
23	B11	27
23	B11	28
23	B11	29
23	B11	30
23	B11	31
23	B11	32
23	B11	33
23	B11	34
23	B11	35
23	B11	36
23	B11	37
23	B11	38
23	B11	39
23	B11	40
24	B12	1
24	B12	2
24	B12	3
24	B12	4
24	B12	5
24	B12	6
24	B12	7
24	B12	8
24	B12	9
24	B12	10
24	B12	11
24	B12	12
24	B12	13
24	B12	14
24	B12	15
24	B12	16
24	B12	17
24	B12	18
24	B12	19
24	B12	20
24	B12	21
24	B12	22
24	B12	23
24	B12	24
24	B12	25
24	B12	26
24	B12	27
24	B12	28
24	B12	29
24	B12	30
24	B12	31
24	B12	32
24	B12	33
24	B12	34
24	B12	35
24	B12	36
24	B12	37
24	B12	38
24	B12	39
24	B12	40
25	C1	1
25	C1	2
25	C1	3
25	C1	4
25	C1	5
25	C1	6
25	C1	7
25	C1	8
25	C1	9
25	C1	10
25	C1	11
25	C1	12
25	C1	13
25	C1	14
25	C1	15
25	C1	16
25	C1	17
25	C1	18
25	C1	19
25	C1	20
25	C1	21
25	C1	22
25	C1	23
25	C1	24
25	C1	25
25	C1	26
25	C1	27
25	C1	28
25	C1	29
25	C1	30
25	C1	31
25	C1	32
25	C1	33
25	C1	34
25	C1	35
25	C1	36
25	C1	37
25	C1	38
25	C1	39
25	C1	40
26	C2	1
26	C2	2
26	C2	3
26	C2	4
26	C2	5
26	C2	6
26	C2	7
26	C2	8
26	C2	9
26	C2	10
26	C2	11
26	C2	12
26	C2	13
26	C2	14
26	C2	15
26	C2	16
26	C2	17
26	C2	18
26	C2	19
26	C2	20
26	C2	21
26	C2	22
26	C2	23
26	C2	24
26	C2	25
26	C2	26
26	C2	27
26	C2	28
26	C2	29
26	C2	30
26	C2	31
26	C2	32
26	C2	33
26	C2	34
26	C2	35
26	C2	36
26	C2	37
26	C2	38
26	C2	39
26	C2	40
27	C3	1
27	C3	2
27	C3	3
27	C3	4
27	C3	5
27	C3	6
27	C3	7
27	C3	8
27	C3	9
27	C3	10
27	C3	11
27	C3	12
27	C3	13
27	C3	14
27	C3	15
27	C3	16
27	C3	17
27	C3	18
27	C3	19
27	C3	20
27	C3	21
27	C3	22
27	C3	23
27	C3	24
27	C3	25
27	C3	26
27	C3	27
27	C3	28
27	C3	29
27	C3	30
27	C3	31
27	C3	32
27	C3	33
27	C3	34
27	C3	35
27	C3	36
27	C3	37
27	C3	38
27	C3	39
27	C3	40
28	C4	1
28	C4	2
28	C4	3
28	C4	4
28	C4	5
28	C4	6
28	C4	7
28	C4	8
28	C4	9
28	C4	10
28	C4	11
28	C4	12
28	C4	13
28	C4	14
28	C4	15
28	C4	16
28	C4	17
28	C4	18
28	C4	19
28	C4	20
28	C4	21
28	C4	22
28	C4	23
28	C4	24
28	C4	25
28	C4	26
28	C4	27
28	C4	28
28	C4	29
28	C4	30
28	C4	31
28	C4	32
28	C4	33
28	C4	34
28	C4	35
28	C4	36
28	C4	37
28	C4	38
28	C4	39
28	C4	40
29	C5	1
29	C5	2
29	C5	3
29	C5	4
29	C5	5
29	C5	6
29	C5	7
29	C5	8
29	C5	9
29	C5	10
29	C5	11
29	C5	12
29	C5	13
29	C5	14
29	C5	15
29	C5	16
29	C5	17
29	C5	18
29	C5	19
29	C5	20
29	C5	21
29	C5	22
29	C5	23
29	C5	24
29	C5	25
29	C5	26
29	C5	27
29	C5	28
29	C5	29
29	C5	30
29	C5	31
29	C5	32
29	C5	33
29	C5	34
29	C5	35
29	C5	36
29	C5	37
29	C5	38
29	C5	39
29	C5	40
30	C6	1
30	C6	2
30	C6	3
30	C6	4
30	C6	5
30	C6	6
30	C6	7
30	C6	8
30	C6	9
30	C6	10
30	C6	11
30	C6	12
30	C6	13
30	C6	14
30	C6	15
30	C6	16
30	C6	17
30	C6	18
30	C6	19
30	C6	20
30	C6	21
30	C6	22
30	C6	23
30	C6	24
30	C6	25
30	C6	26
30	C6	27
30	C6	28
30	C6	29
30	C6	30
30	C6	31
30	C6	32
30	C6	33
30	C6	34
30	C6	35
30	C6	36
30	C6	37
30	C6	38
30	C6	39
30	C6	40
31	C7	1	collage3	-0.0123247	0.0011768
31	C7	2	collage3	-0.0118368	0.00108471
31	C7	3	collage3	-0.0116357	0.000705791
31	C7	4	collage3	-0.011079	0.00068243
31	C7	5	collage3	-0.0108648	0.00031668
31	C7	6	collage3	-0.0101466	0.000454857
31	C7	7	collage3	-0.0102439	-0.000222482
31	C7	8	collage3	-0.0102008	-0.000759439
31	C7	9	collage3	-0.00939677	-0.000535402
31	C7	10	collage3	-0.00837683	-9.54772e-05
31	C7	11	collage3	-0.00834968	-0.000648349
31	C7	12	collage3	-0.00868999	-0.00156867
31	C7	13	collage3	-0.00802252	-0.00148122
31	C7	14	collage3	-0.00576101	0.00020027
31	C7	15	collage3	-0.00481967	0.000561593
31	C7	16	collage3	-0.00241183	0.00238942
31	C7	17	collage3	0.00145602	0.00567725
31	C7	18	collage3	0.0102942	0.0139354
31	C7	19	collage3	0.0283749	0.0314361
31	C7	20	collage3	0.0624603	0.0649415
31	C7	21	collage3	0.124593	0.126494
31	C7	22	collage3	0.234829	0.23615
31	C7	23	collage3	0.418642	0.419384
31	C7	24	collage3	0.688393	0.688554
31	C7	25	collage3	1.01599	1.01557
31	C7	26	collage3	1.337	1.33601
31	C7	27	collage3	1.59248	1.5909
31	C7	28	collage3	1.76557	1.76341
31	C7	29	collage3	1.87345	1.87071
31	C7	30	collage3	1.93547	1.93215
31	C7	31	collage3	1.96624	1.96235
31	C7	32	collage3	1.97713	1.97266
31	C7	33	collage3	1.97888	1.97382
31	C7	34	collage3	1.97651	1.97088
31	C7	35	collage3	1.97589	1.96967
31	C7	36	collage3	1.97289	1.96609
31	C7	37	collage3	1.97081	1.96343
31	C7	38	collage3	1.97082	1.96286
31	C7	39	collage3	1.97072	1.96218
31	C7	40	collage3	1.96997	1.96085
32	C8	1	collage3	-0.0118127	0.000669689
32	C8	2	collage3	-0.0113383	0.000665558
32	C8	3	collage3	-0.0110773	0.000448087
32	C8	4	collage3	-0.010004	0.00104293
32	C8	5	collage3	-0.00923679	0.00133168
32	C8	6	collage3	-0.00929672	0.000793275
32	C8	7	collage3	-0.00968958	-7.80634e-05
32	C8	8	collage3	-0.0101318	-0.000998726
32	C8	9	collage3	-0.010303	-0.00164841
32	C8	10	collage3	-0.00951962	-0.00134352
32	C8	11	collage3	-0.0086838	-0.000986167
32	C8	12	collage3	-0.00854517	-0.00132602
32	C8	13	collage3	-0.00745335	-0.000712673
32	C8	14	collage3	-0.00665856	-0.00039635
32	C8	15	collage3	-0.00524728	0.000536458
32	C8	16	collage3	-0.00196777	0.00333749
32	C8	17	collage3	0.00161882	0.00644561
32	C8	18	collage3	0.0108657	0.015214
32	C8	19	collage3	0.0296829	0.0335528
32	C8	20	collage3	0.0639775	0.0673689
32	C8	21	collage3	0.127376	0.130289
32	C8	22	collage3	0.239978	0.242412
32	C8	23	collage3	0.4282	0.430156
32	C8	24	collage3	0.703286	0.704764
32	C8	25	collage3	1.03948	1.04047
32	C8	26	collage3	1.36879	1.36931
32	C8	27	collage3	1.63022	1.63026
32	C8	28	collage3	1.80753	1.80709
32	C8	29	collage3	1.91751	1.9166
32	C8	30	collage3	1.98188	1.98048
32	C8	31	collage3	2.01601	2.01414
32	C8	32	collage3	2.02612	2.02377
32	C8	33	collage3	2.02576	2.02293
32	C8	34	collage3	2.02428	2.02098
32	C8	35	collage3	2.02379	2.02
32	C8	36	collage3	2.02007	2.01581
32	C8	37	collage3	2.01905	2.01431
32	C8	38	collage3	2.01691	2.01169
32	C8	39	collage3	2.01537	2.00967
32	C8	40	collage3	2.01385	2.00767
33	C9	1	collage3	-0.0073629	-8.97321e-05
33	C9	2	collage3	-0.0064974	0.000524129
33	C9	3	collage3	-0.00620097	0.000568924
33	C9	4	collage3	-0.00640369	0.000114563
33	C9	5	collage3	-0.00610279	0.000163832
33	C9	6	collage3	-0.00536844	0.000646537
33	C9	7	collage3	-0.00541995	0.000343396
33	C9	8	collage3	-0.00542609	8.5616e-05
33	C9	9	collage3	-0.00570017	-0.000440103
33	C9	10	collage3	-0.00586543	-0.000856995
33	C9	11	collage3	-0.00572312	-0.000966318
33	C9	12	collage3	-0.00566424	-0.00115908
33	C9	13	collage3	-0.00477596	-0.000522433
33	C9	14	collage3	-0.00473247	-0.000730585
33	C9	15	collage3	-0.00384499	-9.4733e-05
33	C9	16	collage3	-0.000651241	0.00284737
33	C9	17	collage3	0.00447606	0.00772304
33	C9	18	collage3	0.0143894	0.0173847
33	C9	19	collage3	0.0328241	0.0355678
33	C9	20	collage3	0.0687953	0.0712874
33	C9	21	collage3	0.133895	0.136135
33	C9	22	collage3	0.248689	0.250678
33	C9	23	collage3	0.44009	0.441828
33	C9	24	collage3	0.716773	0.718258
33	C9	25	collage3	1.04964	1.05087
33	C9	26	collage3	1.37025	1.37123
33	C9	27	collage3	1.62135	1.62208
33	C9	28	collage3	1.78862	1.7891
33	C9	29	collage3	1.89195	1.89218
33	C9	30	collage3	1.95133	1.95131
33	C9	31	collage3	1.98261	1.98233
33	C9	32	collage3	1.99297	1.99244
33	C9	33	collage3	1.99226	1.99148
33	C9	34	collage3	1.99038	1.98934
33	C9	35	collage3	1.98819	1.9869
33	C9	36	collage3	1.98517	1.98364
33	C9	37	collage3	1.98352	1.98174
33	C9	38	collage3	1.98447	1.98244
33	C9	39	collage3	1.98447	1.98218
33	C9	40	collage3	1.97966	1.97712
34	C10	1	collage3	0.00680984	0.000642479
34	C10	2	collage3	0.0074417	-0.000307549
34	C10	3	collage3	0.00947314	0.000141998
34	C10	4	collage3	0.0103092	-0.00060385
34	C10	5	collage3	0.0128897	0.000394815
34	C10	6	collage3	0.0148362	0.00075939
34	C10	7	collage3	0.0168041	0.00114535
34	C10	8	collage3	0.0182131	0.000972486
34	C10	9	collage3	0.018222	-0.000600501
34	C10	10	collage3	0.0184139	-0.00199049
34	C10	11	collage3	0.0210299	-0.000956437
34	C10	12	collage3	0.0223564	-0.00121175
34	C10	13	collage3	0.0243951	-0.00075499
34	C10	14	collage3	0.0274439	0.000711963
34	C10	15	collage3	0.0303059	0.00199202
34	C10	16	collage3	0.0378063	0.00791052
34	C10	17	collage3	0.0516986	0.020221
34	C10	18	collage3	0.0800214	0.0469618
34	C10	19	collage3	0.132283	0.0976411
34	C10	20	collage3	0.226212	0.189989
34	C10	21	collage3	0.389817	0.352011
34	C10	22	collage3	0.637363	0.597976
34	C10	23	collage3	0.953225	0.912256
34	C10	24	collage3	1.27627	1.23372
34	C10	25	collage3	1.54471	1.50058
34	C10	26	collage3	1.73458	1.68887
34	C10	27	collage3	1.85586	1.80856
34	C10	28	collage3	1.92452	1.87564
34	C10	29	collage3	1.95796	1.9075
34	C10	30	collage3	1.97168	1.91963
34	C10	31	collage3	1.97576	1.92214
34	C10	32	collage3	1.97608	1.92087
34	C10	33	collage3	1.97186	1.91507
34	C10	34	collage3	1.97064	1.91227
34	C10	35	collage3	1.97384	1.91388
34	C10	36	collage3	1.97127	1.90974
34	C10	37	collage3	1.96827	1.90516
34	C10	38	collage3	1.9654	1.9007
34	C10	39	collage3	1.96353	1.89725
34	C10	40	collage3	1.9611	1.89323
35	C11	1	collage3	0.0120071	0.00203815
35	C11	2	collage3	0.0127486	0.0013134
35	C11	3	collage3	0.0133719	0.000470467
35	C11	4	collage3	0.015011	0.000643395
35	C11	5	collage3	0.0162248	0.000390951
35	C11	6	collage3	0.0180534	0.000753287
35	C11	7	collage3	0.0189446	0.000178298
35	C11	8	collage3	0.019364	-0.000868549
35	C11	9	collage3	0.0217124	1.36523e-05
35	C11	10	collage3	0.0227807	-0.000384191
35	C11	11	collage3	0.0226695	-0.0019617
35	C11	12	collage3	0.0230214	-0.00307596
35	C11	13	collage3	0.0267231	-0.000840452
35	C11	14	collage3	0.0308658	0.00183601
35	C11	15	collage3	0.0333408	0.00284478
35	C11	16	collage3	0.0397443	0.00778211
35	C11	17	collage3	0.0528533	0.0194248
35	C11	18	collage3	0.0740806	0.039186
35	C11	19	collage3	0.116326	0.0799651
35	C11	20	collage3	0.201052	0.163225
35	C11	21	collage3	0.354315	0.315022
35	C11	22	collage3	0.596153	0.555393
35	C11	23	collage3	0.914243	0.872017
35	C11	24	collage3	1.24343	1.19974
35	C11	25	collage3	1.5237	1.47854
35	C11	26	collage3	1.72555	1.67893
35	C11	27	collage3	1.85602	1.80793
35	C11	28	collage3	1.93229	1.88274
35	C11	29	collage3	1.97412	1.9231
35	C11	30	collage3	1.99486	1.94237
35	C11	31	collage3	1.99982	1.94586
35	C11	32	collage3	1.99684	1.94142
35	C11	33	collage3	1.99346	1.93657
35	C11	34	collage3	1.99458	1.93623
35	C11	35	collage3	1.99476	1.93494
35	C11	36	collage3	1.99365	1.93236
35	C11	37	collage3	1.99145	1.92869
35	C11	38	collage3	1.99249	1.92827
35	C11	39	collage3	1.9942	1.92852
35	C11	40	collage3	1.99102	1.92387
36	C12	1	collage3	0.00376036	0.00134122
36	C12	2	collage3	0.00442523	0.000523805
36	C12	3	collage3	0.00493825	-0.000445456
36	C12	4	collage3	0.00660645	-0.00025953
36	C12	5	collage3	0.00866595	0.000317689
36	C12	6	collage3	0.0106256	0.000795066
36	C12	7	collage3	0.0122702	0.000957394
36	C12	8	collage3	0.0133167	0.000521576
36	C12	9	collage3	0.0143653	8.79623e-05
36	C12	10	collage3	0.0147192	-0.0010405
36	C12	11	collage3	0.016647	-0.000594938
36	C12	12	collage3	0.017415	-0.00130922
36	C12	13	collage3	0.0190753	-0.00113122
36	C12	14	collage3	0.021491	-0.000197795
36	C12	15	collage3	0.02547	0.00229897
36	C12	16	collage3	0.0332665	0.00861318
36	C12	17	collage3	0.0456967	0.0195611
36	C12	18	collage3	0.0714823	0.0438644
36	C12	19	collage3	0.120878	0.0917783
36	C12	20	collage3	0.21205	0.181467
36	C12	21	collage3	0.371838	0.339773
36	C12	22	collage3	0.618884	0.585337
36	C12	23	collage3	0.938599	0.90357
36	C12	24	collage3	1.27151	1.235
36	C12	25	collage3	1.55072	1.51273
36	C12	26	collage3	1.74867	1.7092
36	C12	27	collage3	1.87545	1.83449
36	C12	28	collage3	1.95072	1.90828
36	C12	29	collage3	1.99159	1.94767
36	C12	30	collage3	2.01092	1.96552
36	C12	31	collage3	2.01771	1.97082
36	C12	32	collage3	2.01812	1.96975
36	C12	33	collage3	2.01289	1.96303
36	C12	34	collage3	2.01012	1.95879
36	C12	35	collage3	2.01091	1.9581
36	C12	36	collage3	2.00872	1.95442
36	C12	37	collage3	2.00819	1.95241
36	C12	38	collage3	2.00874	1.95147
36	C12	39	collage3	2.00938	1.95063
36	C12	40	collage3	2.00704	1.94681
37	D1	1
37	D1	2
37	D1	3
37	D1	4
37	D1	5
37	D1	6
37	D1	7
37	D1	8
37	D1	9
37	D1	10
37	D1	11
37	D1	12
37	D1	13
37	D1	14
37	D1	15
37	D1	16
37	D1	17
37	D1	18
37	D1	19
37	D1	20
37	D1	21
37	D1	22
37	D1	23
37	D1	24
37	D1	25
37	D1	26
37	D1	27
37	D1	28
37	D1	29
37	D1	30
37	D1	31
37	D1	32
37	D1	33
37	D1	34
37	D1	35
37	D1	36
37	D1	37
37	D1	38
37	D1	39
37	D1	40
38	D2	1
38	D2	2
38	D2	3
38	D2	4
38	D2	5
38	D2	6
38	D2	7
38	D2	8
38	D2	9
38	D2	10
38	D2	11
38	D2	12
38	D2	13
38	D2	14
38	D2	15
38	D2	16
38	D2	17
38	D2	18
38	D2	19
38	D2	20
38	D2	21
38	D2	22
38	D2	23
38	D2	24
38	D2	25
38	D2	26
38	D2	27
38	D2	28
38	D2	29
38	D2	30
38	D2	31
38	D2	32
38	D2	33
38	D2	34
38	D2	35
38	D2	36
38	D2	37
38	D2	38
38	D2	39
38	D2	40
39	D3	1
39	D3	2
39	D3	3
39	D3	4
39	D3	5
39	D3	6
39	D3	7
39	D3	8
39	D3	9
39	D3	10
39	D3	11
39	D3	12
39	D3	13
39	D3	14
39	D3	15
39	D3	16
39	D3	17
39	D3	18
39	D3	19
39	D3	20
39	D3	21
39	D3	22
39	D3	23
39	D3	24
39	D3	25
39	D3	26
39	D3	27
39	D3	28
39	D3	29
39	D3	30
39	D3	31
39	D3	32
39	D3	33
39	D3	34
39	D3	35
39	D3	36
39	D3	37
39	D3	38
39	D3	39
39	D3	40
40	D4	1
40	D4	2
40	D4	3
40	D4	4
40	D4	5
40	D4	6
40	D4	7
40	D4	8
40	D4	9
40	D4	10
40	D4	11
40	D4	12
40	D4	13
40	D4	14
40	D4	15
40	D4	16
40	D4	17
40	D4	18
40	D4	19
40	D4	20
40	D4	21
40	D4	22
40	D4	23
40	D4	24
40	D4	25
40	D4	26
40	D4	27
40	D4	28
40	D4	29
40	D4	30
40	D4	31
40	D4	32
40	D4	33
40	D4	34
40	D4	35
40	D4	36
40	D4	37
40	D4	38
40	D4	39
40	D4	40
41	D5	1
41	D5	2
41	D5	3
41	D5	4
41	D5	5
41	D5	6
41	D5	7
41	D5	8
41	D5	9
41	D5	10
41	D5	11
41	D5	12
41	D5	13
41	D5	14
41	D5	15
41	D5	16
41	D5	17
41	D5	18
41	D5	19
41	D5	20
41	D5	21
41	D5	22
41	D5	23
41	D5	24
41	D5	25
41	D5	26
41	D5	27
41	D5	28
41	D5	29
41	D5	30
41	D5	31
41	D5	32
41	D5	33
41	D5	34
41	D5	35
41	D5	36
41	D5	37
41	D5	38
41	D5	39
41	D5	40
42	D6	1
42	D6	2
42	D6	3
42	D6	4
42	D6	5
42	D6	6
42	D6	7
42	D6	8
42	D6	9
42	D6	10
42	D6	11
42	D6	12
42	D6	13
42	D6	14
42	D6	15
42	D6	16
42	D6	17
42	D6	18
42	D6	19
42	D6	20
42	D6	21
42	D6	22
42	D6	23
42	D6	24
42	D6	25
42	D6	26
42	D6	27
42	D6	28
42	D6	29
42	D6	30
42	D6	31
42	D6	32
42	D6	33
42	D6	34
42	D6	35
42	D6	36
42	D6	37
42	D6	38
42	D6	39
42	D6	40
43	D7	1	ctgf	-0.0292784	-0.00320539
43	D7	2	ctgf	-0.0288761	-0.00386359
43	D7	3	ctgf	-0.0250522	-0.00110017
43	D7	4	ctgf	-0.0219906	0.000900955
43	D7	5	ctgf	-0.020939	0.000891982
43	D7	6	ctgf	-0.0191624	0.00160817
43	D7	7	ctgf	-0.0193614	0.000348659
43	D7	8	ctgf	-0.0196253	-0.000975805
43	D7	9	ctgf	-0.0186483	-0.00105925
43	D7	10	ctgf	-0.0178724	-0.00134389
43	D7	11	ctgf	-0.0175705	-0.00210251
43	D7	12	ctgf	-0.0146467	-0.00023914
43	D7	13	ctgf	-0.010276	0.003071
43	D7	14	ctgf	-0.00273961	0.00954692
43	D7	15	ctgf	0.0104922	0.0217182
43	D7	16	ctgf	0.0350626	0.0452282
43	D7	17	ctgf	0.0840159	0.093121
43	D7	18	ctgf	0.17171	0.179755
43	D7	19	ctgf	0.326657	0.333641
43	D7	20	ctgf	0.576522	0.582445
43	D7	21	ctgf	0.918216	0.923079
43	D7	22	ctgf	1.2956	1.2994
43	D7	23	ctgf	1.62225	1.62499
43	D7	24	ctgf	1.85261	1.85429
43	D7	25	ctgf	1.99122	1.99184
43	D7	26	ctgf	2.07179	2.07135
43	D7	27	ctgf	2.11631	2.11481
43	D7	28	ctgf	2.13761	2.13505
43	D7	29	ctgf	2.14776	2.14414
43	D7	30	ctgf	2.15456	2.14988
43	D7	31	ctgf	2.15648	2.15073
43	D7	32	ctgf	2.15405	2.14725
43	D7	33	ctgf	2.15087	2.143
43	D7	34	ctgf	2.14949	2.14057
43	D7	35	ctgf	2.15037	2.14039
43	D7	36	ctgf	2.1491	2.13805
43	D7	37	ctgf	2.14739	2.13528
43	D7	38	ctgf	2.14512	2.13195
43	D7	39	ctgf	2.14387	2.12964
43	D7	40	ctgf	2.13999	2.12471
44	D8	1	ctgf	-0.00798779	0.00156627
44	D8	2	ctgf	-0.0077125	-0.000496528
44	D8	3	ctgf	-0.00483561	4.22688e-05
44	D8	4	ctgf	-0.00350492	-0.000965135
44	D8	5	ctgf	0.000388537	0.000590229
44	D8	6	ctgf	0.00197456	-0.000161845
44	D8	7	ctgf	0.00430639	-0.000168106
44	D8	8	ctgf	0.00691143	9.88405e-05
44	D8	9	ctgf	0.0100375	0.000886829
44	D8	10	ctgf	0.0124062	0.000917412
44	D8	11	ctgf	0.0137261	-0.000100754
44	D8	12	ctgf	0.015256	-0.000909001
44	D8	13	ctgf	0.0182723	-0.000230739
44	D8	14	ctgf	0.023793	0.00295189
44	D8	15	ctgf	0.0361697	0.0129905
44	D8	16	ctgf	0.0578086	0.0322913
44	D8	17	ctgf	0.100126	0.0722704
44	D8	18	ctgf	0.178382	0.148188
44	D8	19	ctgf	0.314291	0.281759
44	D8	20	ctgf	0.534173	0.499303
44	D8	21	ctgf	0.838904	0.801696
44	D8	22	ctgf	1.1837	1.14415
44	D8	23	ctgf	1.49002	1.44813
44	D8	24	ctgf	1.71172	1.6675
44	D8	25	ctgf	1.84763	1.80107
44	D8	26	ctgf	1.92361	1.87471
44	D8	27	ctgf	1.96812	1.91689
44	D8	28	ctgf	1.99016	1.93658
44	D8	29	ctgf	1.9997	1.94379
44	D8	30	ctgf	2.00101	1.94276
44	D8	31	ctgf	1.99612	1.93553
44	D8	32	ctgf	1.99169	1.92876
44	D8	33	ctgf	1.98961	1.92434
44	D8	34	ctgf	1.98433	1.91672
44	D8	35	ctgf	1.98354	1.9136
44	D8	36	ctgf	1.97988	1.9076
44	D8	37	ctgf	1.97632	1.90171
44	D8	38	ctgf	1.97242	1.89546
44	D8	39	ctgf	1.97033	1.89104
44	D8	40	ctgf	1.96569	1.88406
45	D9	1	ctgf	-0.0416357	-0.00163023
45	D9	2	ctgf	-0.0404357	-0.00245951
45	D9	3	ctgf	-0.0379963	-0.00204952
45	D9	4	ctgf	-0.0343176	-0.000400181
45	D9	5	ctgf	-0.0303419	0.0015462
45	D9	6	ctgf	-0.0280973	0.00176144
45	D9	7	ctgf	-0.0272834	0.000546002
45	D9	8	ctgf	-0.0252545	0.000545514
45	D9	9	ctgf	-0.0237282	4.24707e-05
45	D9	10	ctgf	-0.0223177	-0.000576365
45	D9	11	ctgf	-0.0214795	-0.00176752
45	D9	12	ctgf	-0.0191949	-0.00151222
45	D9	13	ctgf	-0.0137891	0.00186418
45	D9	14	ctgf	-0.00523606	0.00838789
45	D9	15	ctgf	0.00636294	0.0179575
45	D9	16	ctgf	0.0316917	0.0412569
45	D9	17	ctgf	0.0799186	0.0874545
45	D9	18	ctgf	0.167672	0.173179
45	D9	19	ctgf	0.322423	0.3259
45	D9	20	ctgf	0.570136	0.571584
45	D9	21	ctgf	0.909289	0.908707
45	D9	22	ctgf	1.28484	1.28223
45	D9	23	ctgf	1.61407	1.60943
45	D9	24	ctgf	1.84643	1.83976
45	D9	25	ctgf	1.98972	1.98102
45	D9	26	ctgf	2.06863	2.0579
45	D9	27	ctgf	2.11644	2.10368
45	D9	28	ctgf	2.14054	2.12575
45	D9	29	ctgf	2.14988	2.13307
45	D9	30	ctgf	2.15614	2.1373
45	D9	31	ctgf	2.15371	2.13284
45	D9	32	ctgf	2.14875	2.12584
45	D9	33	ctgf	2.14831	2.12338
45	D9	34	ctgf	2.14663	2.11967
45	D9	35	ctgf	2.14792	2.11893
45	D9	36	ctgf	2.14401	2.11299
45	D9	37	ctgf	2.14147	2.10842
45	D9	38	ctgf	2.13905	2.10397
45	D9	39	ctgf	2.13708	2.09997
45	D9	40	ctgf	2.13227	2.09313
46	D10	1	ctgf	0.0257752	0.00272591
46	D10	2	ctgf	0.0260665	2.33125e-05
46	D10	3	ctgf	0.0284321	-0.000604893
46	D10	4	ctgf	0.0305457	-0.00148527
46	D10	5	ctgf	0.0347301	-0.000294763
46	D10	6	ctgf	0.0395854	0.00156672
46	D10	7	ctgf	0.0432128	0.00220016
46	D10	8	ctgf	0.0454977	0.00149115
46	D10	9	ctgf	0.045761	-0.0012394
46	D10	10	ctgf	0.04837	-0.00162434
46	D10	11	ctgf	0.0529788	-9.37622e-06
46	D10	12	ctgf	0.0591509	0.00316881
46	D10	13	ctgf	0.0708802	0.0119042
46	D10	14	ctgf	0.0921971	0.0302272
46	D10	15	ctgf	0.136003	0.0710389
46	D10	16	ctgf	0.216501	0.148543
46	D10	17	ctgf	0.360028	0.289077
46	D10	18	ctgf	0.590633	0.516687
46	D10	19	ctgf	0.91337	0.836431
46	D10	20	ctgf	1.27686	1.19692
46	D10	21	ctgf	1.5986	1.51567
46	D10	22	ctgf	1.83011	1.74419
46	D10	23	ctgf	1.97656	1.88765
46	D10	24	ctgf	2.06028	1.96837
46	D10	25	ctgf	2.10747	2.01257
46	D10	26	ctgf	2.12777	2.02987
46	D10	27	ctgf	2.14092	2.04003
46	D10	28	ctgf	2.14272	2.03883
46	D10	29	ctgf	2.13896	2.03208
46	D10	30	ctgf	2.1403	2.03043
46	D10	31	ctgf	2.14328	2.03041
46	D10	32	ctgf	2.14482	2.02896
46	D10	33	ctgf	2.13995	2.02109
46	D10	34	ctgf	2.1335	2.01166
46	D10	35	ctgf	2.13318	2.00834
46	D10	36	ctgf	2.13099	2.00315
46	D10	37	ctgf	2.13452	2.00369
46	D10	38	ctgf	2.13012	1.9963
46	D10	39	ctgf	2.12939	1.99257
46	D10	40	ctgf	2.12808	1.98827
47	D11	1	ctgf	-0.0156158	0.00451914
47	D11	2	ctgf	-0.0155996	0.00168057
47	D11	3	ctgf	-0.0141677	0.000257726
47	D11	4	ctgf	-0.0104371	0.00113359
47	D11	5	ctgf	-0.00795191	0.000763988
47	D11	6	ctgf	-0.00578981	7.13319e-05
47	D11	7	ctgf	-0.00325209	-0.000245706
47	D11	8	ctgf	-0.00145271	-0.00130109
47	D11	9	ctgf	0.000550879	-0.00215225
47	D11	10	ctgf	0.00370125	-0.00185664
47	D11	11	ctgf	0.00785144	-0.00056121
47	D11	12	ctgf	0.0151577	0.00389026
47	D11	13	ctgf	0.0217312	0.00760905
47	D11	14	ctgf	0.0336711	0.0166942
47	D11	15	ctgf	0.0664754	0.0466437
47	D11	16	ctgf	0.13089	0.108203
47	D11	17	ctgf	0.254051	0.22851
47	D11	18	ctgf	0.45532	0.426924
47	D11	19	ctgf	0.745128	0.713877
47	D11	20	ctgf	1.09959	1.06549
47	D11	21	ctgf	1.44126	1.4043
47	D11	22	ctgf	1.70383	1.66402
47	D11	23	ctgf	1.87764	1.83497
47	D11	24	ctgf	1.9806	1.93508
47	D11	25	ctgf	2.03518	1.9868
47	D11	26	ctgf	2.06418	2.01294
47	D11	27	ctgf	2.08102	2.02694
47	D11	28	ctgf	2.08855	2.03161
47	D11	29	ctgf	2.0911	2.0313
47	D11	30	ctgf	2.0902	2.02755
47	D11	31	ctgf	2.09055	2.02505
47	D11	32	ctgf	2.08892	2.02056
47	D11	33	ctgf	2.0888	2.01759
47	D11	34	ctgf	2.08819	2.01411
47	D11	35	ctgf	2.08786	2.01093
47	D11	36	ctgf	2.08381	2.00403
47	D11	37	ctgf	2.08174	1.9991
47	D11	38	ctgf	2.08291	1.99742
47	D11	39	ctgf	2.08366	1.99532
47	D11	40	ctgf	2.08204	1.99084
48	D12	1	ctgf	-0.024101	0.000801013
48	D12	2	ctgf	-0.0234745	-0.00183344
48	D12	3	ctgf	-0.0205666	-0.00218646
48	D12	4	ctgf	-0.0167304	-0.00161119
48	D12	5	ctgf	-0.0103472	0.00151113
48	D12	6	ctgf	-0.00591169	0.00268567
48	D12	7	ctgf	-0.00330772	0.0020287
48	D12	8	ctgf	-0.00124014	0.00083535
48	D12	9	ctgf	-0.000115313	-0.00130076
48	D12	10	ctgf	0.00270197	-0.00174441
48	D12	11	ctgf	0.00748928	-0.000218031
48	D12	12	ctgf	0.0147079	0.00373969
48	D12	13	ctgf	0.0257094	0.0114803
48	D12	14	ctgf	0.0511133	0.0336232
48	D12	15	ctgf	0.09779	0.077039
48	D12	16	ctgf	0.179285	0.155274
48	D12	17	ctgf	0.328202	0.300929
48	D12	18	ctgf	0.564882	0.534348
48	D12	19	ctgf	0.891902	0.858107
48	D12	20	ctgf	1.25754	1.22048
48	D12	21	ctgf	1.57749	1.53717
48	D12	22	ctgf	1.81058	1.767
48	D12	23	ctgf	1.95864	1.9118
48	D12	24	ctgf	2.04361	1.99351
48	D12	25	ctgf	2.08961	2.03625
48	D12	26	ctgf	2.11249	2.05586
48	D12	27	ctgf	2.12339	2.06351
48	D12	28	ctgf	2.12763	2.06449
48	D12	29	ctgf	2.13191	2.06551
48	D12	30	ctgf	2.13454	2.06487
48	D12	31	ctgf	2.13245	2.05953
48	D12	32	ctgf	2.12962	2.05344
48	D12	33	ctgf	2.12898	2.04953
48	D12	34	ctgf	2.13077	2.04806
48	D12	35	ctgf	2.1308	2.04483
48	D12	36	ctgf	2.12598	2.03675
48	D12	37	ctgf	2.12457	2.03208
48	D12	38	ctgf	2.12364	2.02789
48	D12	39	ctgf	2.12073	2.02172
48	D12	40	ctgf	2.11413	2.01186
49	E1	1
49	E1	2
49	E1	3
49	E1	4
49	E1	5
49	E1	6
49	E1	7
49	E1	8
49	E1	9
49	E1	10
49	E1	11
49	E1	12
49	E1	13
49	E1	14
49	E1	15
49	E1	16
49	E1	17
49	E1	18
49	E1	19
49	E1	20
49	E1	21
49	E1	22
49	E1	23
49	E1	24
49	E1	25
49	E1	26
49	E1	27
49	E1	28
49	E1	29
49	E1	30
49	E1	31
49	E1	32
49	E1	33
49	E1	34
49	E1	35
49	E1	36
49	E1	37
[truncated: 1,883 more rows]

## Sheet: Results
Block Type	96-Well 0.2-mL Block
Calibration Background is expired	No
Calibration Background performed on	09-11-2020
Calibration Pure Dye ABY is expired	No
Calibration Pure Dye ABY performed on	09-11-2020
Calibration Pure Dye FAM is expired	No
Calibration Pure Dye FAM performed on	09-11-2020
Calibration Pure Dye JUN is expired	No
Calibration Pure Dye JUN performed on	09-11-2020
Calibration Pure Dye NED is expired	No
Calibration Pure Dye NED performed on	09-11-2020
Calibration Pure Dye ROX is expired	No
Calibration Pure Dye ROX performed on	09-11-2020
Calibration Pure Dye SYBR is expired	No
Calibration Pure Dye SYBR performed on	09-11-2020
Calibration Pure Dye TAMRA is expired	No
Calibration Pure Dye TAMRA performed on	09-11-2020
Calibration Pure Dye VIC is expired	No
Calibration Pure Dye VIC performed on	09-11-2020
Calibration ROI is expired	No
Calibration ROI performed on	09-11-2020
Calibration Uniformity is expired	No
Calibration Uniformity performed on	09-11-2020
Chemistry	SYBR_GREEN
Date Created	2021-10-22 09:44:06 AM CST
Experiment Barcode
Experiment Comment
Experiment File Name	C:\Users\Leya-zha\Desktop\A 文章 ADAMTS8在心脏纤维化中的作用\Figure6 ADAMTS8通过MAPK通路和PI3K-AKT通路\转病毒后NOX4 2020-10-01_ZYF.eds
Experiment Name	2020-10-01_ZYF
Experiment Run End Time	2020-10-01 18:41:23 PM CST
Experiment Type	Comparative Cт (ΔΔCт)
Instrument Name	272322851
Instrument Serial Number	272322851
Instrument Type	QuantStudio™ 3 System
Passive Reference	ROX
Post-read Stage/Step
Pre-read Stage/Step
Quantification Cycle Method	Ct
Signal Smoothing On	true
Stage where Melt Analysis is performed	Stage3
Stage/ Cycle where Ct Analysis is performed	Stage2, Step2
User Name
Well	Well Position	Omit	Sample Name	Target Name	Task	Reporter	Quencher	Quantity	Quantity Mean	Quantity SD	RQ	RQ Min	RQ Max	CT	Ct Mean	Ct SD	Delta Ct	Delta Ct Mean	Delta Ct SD	Delta Ct SE	Delta Delta Ct	Automatic Ct Threshold	Ct Threshold	Automatic Baseline	Baseline Start	Baseline End	Amp Status	Comments	Cq Conf	Tm1	Tm2	Tm3	Tm4
31	C7	FALSE	AD-v	collage3	UNKNOWN	SYBR	None				1	0.924239	1.08197	21.7257	21.6756	0.0531232		4.72758	0.070907	0.0409382	0	TRUE	0.200806	TRUE	3	16	Amp		0.987004	85.6916
32	C8	FALSE	AD-v	collage3	UNKNOWN	SYBR	None				1	0.924239	1.08197	21.6813	21.6756	0.0531232		4.72758	0.070907	0.0409382	0	TRUE	0.200806	TRUE	3	16	Amp		0.988373	85.6916
33	C9	FALSE	AD-v	collage3	UNKNOWN	SYBR	None				1	0.924239	1.08197	21.6199	21.6756	0.0531232		4.72758	0.070907	0.0409382	0	TRUE	0.200806	TRUE	3	16	Amp		0.989057	85.4033
34	C10	FALSE	Ad-ADAMTS8	collage3	UNKNOWN	SYBR	None				1.35478	1.12121	1.63702	20.0442	20.1431	0.113552		4.28952	0.170313	0.0983301	-0.43806	TRUE	0.200806	TRUE	3	15	Amp		0.98048	85.4033
35	C11	FALSE	Ad-ADAMTS8	collage3	UNKNOWN	SYBR	None				1.35478	1.12121	1.63702	20.2671	20.1431	0.113552		4.28952	0.170313	0.0983301	-0.43806	TRUE	0.200806	TRUE	3	15	Amp		0.976948	85.3968
36	C12	FALSE	Ad-ADAMTS8	collage3	UNKNOWN	SYBR	None				1.35478	1.12121	1.63702	20.118	20.1431	0.113552		4.28952	0.170313	0.0983301	-0.43806	TRUE	0.200806	TRUE	3	15	Amp		0.977842	85.5479
43	D7	FALSE	AD-v	ctgf	UNKNOWN	SYBR	None				1	0.835944	1.19625	18.4128	18.5246	0.154286		1.57654	0.161275	0.0931124	0	TRUE	0.236638	TRUE	3	13	Amp		0.980388	84.0294
44	D8	FALSE	AD-v	ctgf	UNKNOWN	SYBR	None				1	0.835944	1.19625	18.7006	18.5246	0.154286		1.57654	0.161275	0.0931124	0	TRUE	0.236638	TRUE	3	13	Amp		0.979974	84.0294
45	D9	FALSE	AD-v	ctgf	UNKNOWN	SYBR	None				1	0.835944	1.19625	18.4603	18.5246	0.154286		1.57654	0.161275	0.0931124	0	TRUE	0.236638	TRUE	3	13	Amp		0.974396	83.8913
46	D10	FALSE	Ad-ADAMTS8	ctgf	UNKNOWN	SYBR	None				1.5893	1.19862	2.10732	16.6708	16.7617	0.219907		0.908148	0.253912	0.146596	-0.668392	TRUE	0.236638	TRUE	3	11	Amp		0.988522	83.7401
47	D11	FALSE	Ad-ADAMTS8	ctgf	UNKNOWN	SYBR	None				1.5893	1.19862	2.10732	17.0125	16.7617	0.219907		0.908148	0.253912	0.146596	-0.668392	TRUE	0.236638	TRUE	3	12	Amp		0.988632	83.8851
48	D12	FALSE	Ad-ADAMTS8	ctgf	UNKNOWN	SYBR	None				1.5893	1.19862	2.10732	16.6018	16.7617	0.219907		0.908148	0.253912	0.146596	-0.668392	TRUE	0.236638	TRUE	3	11	Amp		0.983578	83.8851
55	E7	FALSE	AD-v	actin	UNKNOWN	SYBR	None							16.8973	16.9481	0.0469651						TRUE	0.218353	TRUE	3	11	Amp		0.989882	86.7495
56	E8	FALSE	AD-v	actin	UNKNOWN	SYBR	None							16.9899	16.9481	0.0469651						TRUE	0.218353	TRUE	3	12	Amp		0.991911	86.7495
57	E9	FALSE	AD-v	actin	UNKNOWN	SYBR	None							16.9569	16.9481	0.0469651						TRUE	0.218353	TRUE	3	12	Amp		0.988828	86.6129
58	E10	FALSE	Ad-ADAMTS8	actin	UNKNOWN	SYBR	None							15.7117	15.8536	0.126934						TRUE	0.218353	TRUE	3	10	Amp		0.98861	86.6129
59	E11	FALSE	Ad-ADAMTS8	actin	UNKNOWN	SYBR	None							15.8925	15.8536	0.126934						TRUE	0.218353	TRUE	3	11	Amp		0.985212	86.7572
60	E12	FALSE	Ad-ADAMTS8	actin	UNKNOWN	SYBR	None							15.9565	15.8536	0.126934						TRUE	0.218353	TRUE	3	10	Amp		0.983974	86.7572
67	F7	FALSE	AD-v	adam8	UNKNOWN	SYBR	None				1	0.896414	1.11556	28.5832	28.6695	0.08649		11.7215	0.0984188	0.0568221	0	TRUE	0.237846	TRUE	3	23	Amp		0.985498	85.3894
68	F8	FALSE	AD-v	adam8	UNKNOWN	SYBR	None				1	0.896414	1.11556	28.7562	28.6695	0.08649		11.7215	0.0984188	0.0568221	0	TRUE	0.237846	TRUE	3	23	Amp		0.989524	85.2383
69	F9	FALSE	AD-v	adam8	UNKNOWN	SYBR	None				1	0.896414	1.11556	28.6692	28.6695	0.08649		11.7215	0.0984188	0.0568221	0	TRUE	0.237846	TRUE	3	23	Amp		0.978605	85.1009
70	F10	FALSE	Ad-ADAMTS8	adam8	UNKNOWN	SYBR	None				1533.33	1241.46	1893.82	16.8297	16.9926	0.141432		1.13903	0.190041	0.10972	-10.5825	TRUE	0.237846	TRUE	3	11	Amp		0.985585	85.2521
71	F11	FALSE	Ad-ADAMTS8	adam8	UNKNOWN	SYBR	None				1533.33	1241.46	1893.82	17.0636	16.9926	0.141432		1.13903	0.190041	0.10972	-10.5825	TRUE	0.237846	TRUE	3	12	Amp		0.980552	85.5479
72	F12	FALSE	Ad-ADAMTS8	adam8	UNKNOWN	SYBR	None				1533.33	1241.46	1893.82	17.0844	16.9926	0.141432		1.13903	0.190041	0.10972	-10.5825	TRUE	0.237846	TRUE	3	12	Amp		0.988002	85.3968
79	G7	FALSE	AD-v	nox4	UNKNOWN	SYBR	None				1	0.893539	1.11914	27.7744	27.8457	0.0897653		10.8976	0.101309	0.0584909	0	TRUE	0.241662	TRUE	3	22	Amp		0.983164	81.9137
80	G8	FALSE	AD-v	nox4	UNKNOWN	SYBR	None				1	0.893539	1.11914	27.8162	27.8457	0.0897653		10.8976	0.101309	0.0584909	0	TRUE	0.241662	TRUE	3	22	Amp		0.984299	81.9137
81	G9	FALSE	AD-v	nox4	UNKNOWN	SYBR	None				1	0.893539	1.11914	27.9465	27.8457	0.0897653		10.8976	0.101309	0.0584909	0	TRUE	0.241662	TRUE	3	22	Amp		0.978614	81.6232
82	G10	FALSE	Ad-ADAMTS8	nox4	UNKNOWN	SYBR	None				2.35287	2.00433	2.76201	25.5004	25.5168	0.068614		9.66322	0.144292	0.0833071	-1.23442	TRUE	0.241662	TRUE	3	20	Amp		0.976442	81.6232
83	G11	FALSE	Ad-ADAMTS8	nox4	UNKNOWN	SYBR	None				2.35287	2.00433	2.76201	25.5921	25.5168	0.068614		9.66322	0.144292	0.0833071	-1.23442	TRUE	0.241662	TRUE	3	20	Amp		0.972622	81.92
84	G12	FALSE	Ad-ADAMTS8	nox4	UNKNOWN	SYBR	None				2.35287	2.00433	2.76201	25.4579	25.5168	0.068614		9.66322	0.144292	0.0833071	-1.23442	TRUE	0.241662	TRUE	3	20	Amp		0.96573	81.92
Analysis Type	Singleplex
Endogenous Control	actin
RQ Min/Max Confidence Level	95.0
Reference Sample	AD-v

## Sheet: Melt Curve Raw Data
Block Type	96-Well 0.2-mL Block
Calibration Background is expired	No
Calibration Background performed on	09-11-2020
Calibration Pure Dye ABY is expired	No
Calibration Pure Dye ABY performed on	09-11-2020
Calibration Pure Dye FAM is expired	No
Calibration Pure Dye FAM performed on	09-11-2020
Calibration Pure Dye JUN is expired	No
Calibration Pure Dye JUN performed on	09-11-2020
Calibration Pure Dye NED is expired	No
Calibration Pure Dye NED performed on	09-11-2020
Calibration Pure Dye ROX is expired	No
Calibration Pure Dye ROX performed on	09-11-2020
Calibration Pure Dye SYBR is expired	No
Calibration Pure Dye SYBR performed on	09-11-2020
Calibration Pure Dye TAMRA is expired	No
Calibration Pure Dye TAMRA performed on	09-11-2020
Calibration Pure Dye VIC is expired	No
Calibration Pure Dye VIC performed on	09-11-2020
Calibration ROI is expired	No
Calibration ROI performed on	09-11-2020
Calibration Uniformity is expired	No
Calibration Uniformity performed on	09-11-2020
Chemistry	SYBR_GREEN
Date Created	2021-10-22 09:44:06 AM CST
Experiment Barcode
Experiment Comment
Experiment File Name	C:\Users\Leya-zha\Desktop\A 文章 ADAMTS8在心脏纤维化中的作用\Figure6 ADAMTS8通过MAPK通路和PI3K-AKT通路\转病毒后NOX4 2020-10-01_ZYF.eds
Experiment Name	2020-10-01_ZYF
Experiment Run End Time	2020-10-01 18:41:23 PM CST
Experiment Type	Comparative Cт (ΔΔCт)
Instrument Name	272322851
Instrument Serial Number	272322851
Instrument Type	QuantStudio™ 3 System
Passive Reference	ROX
Post-read Stage/Step
Pre-read Stage/Step
Quantification Cycle Method	Ct
Signal Smoothing On	true
Stage where Melt Analysis is performed	Stage3
Stage/ Cycle where Ct Analysis is performed	Stage2, Step2
User Name
Well	Well Position	Reading	Temperature	Fluorescence	Derivative	Target Name
31	C7	1	60.0017	633876	14051.4	collage3
31	C7	2	60.3039	631673	14306.8	collage3
31	C7	3	60.6062	628344	14593.7	collage3
31	C7	4	60.9084	624498	14900	collage3
31	C7	5	61.2106	619575	15212.6	collage3
31	C7	6	61.5129	615676	15519.7	collage3
31	C7	7	61.8151	610592	15810.5	collage3
31	C7	8	62.1173	605562	16073.9	collage3
31	C7	9	62.4196	600949	16302.2	collage3
31	C7	10	62.7218	595425	16524	collage3
31	C7	11	63.024	590030	16696.3	collage3
31	C7	12	63.3263	584883	16828	collage3
31	C7	13	63.6285	580053	16932.3	collage3
31	C7	14	63.9307	574363	17022.1	collage3
31	C7	15	64.233	568835	17107.5	collage3
31	C7	16	64.5352	563962	17194.6	collage3
31	C7	17	64.8375	558129	17284.1	collage3
31	C7	18	65.1397	553248	17370.7	collage3
31	C7	19	65.4419	547032	17443.3	collage3
31	C7	20	65.7442	542368	17487.3	collage3
31	C7	21	66.0464	536236	17490.5	collage3
31	C7	22	66.3486	530556	17446.5	collage3
31	C7	23	66.6509	525316	17356.9	collage3
31	C7	24	66.9531	519803	17229.4	collage3
31	C7	25	67.2553	514746	17074.6	collage3
31	C7	26	67.5576	508834	16904.7	collage3
31	C7	27	67.8598	503606	16735.1	collage3
31	C7	28	68.162	498411	16584.7	collage3
31	C7	29	68.4643	492993	16472.6	collage3
31	C7	30	68.7665	488424	16411.5	collage3
31	C7	31	69.0687	483126	16400.2	collage3
31	C7	32	69.371	478206	16420.5	collage3
31	C7	33	69.6732	473027	16441.1	collage3
31	C7	34	69.9754	467674	16428.8	collage3
31	C7	35	70.2777	462144	16361.2	collage3
31	C7	36	70.5799	457443	16245.6	collage3
31	C7	37	70.8821	451994	16110	collage3
31	C7	38	71.1844	447448	15968.8	collage3
31	C7	39	71.4866	442609	15848	collage3
31	C7	40	71.7888	437788	15762.3	collage3
31	C7	41	72.0911	433412	15710.8	collage3
31	C7	42	72.3933	428195	15680.2	collage3
31	C7	43	72.6956	423539	15657.1	collage3
31	C7	44	72.9978	417949	15641.2	collage3
31	C7	45	73.3	413817	15652.6	collage3
31	C7	46	73.6023	409092	15727.9	collage3
31	C7	47	73.9045	404936	15904.4	collage3
31	C7	48	74.2067	400126	16199.8	collage3
31	C7	49	74.509	395236	16659.4	collage3
31	C7	50	74.8112	390279	17193.5	collage3
31	C7	51	75.1134	384311	17687.6	collage3
31	C7	52	75.4157	377830	18046.5	collage3
31	C7	53	75.7179	370977	18206.7	collage3
31	C7	54	76.0201	365844	18155.8	collage3
31	C7	55	76.3224	360034	17931.1	collage3
31	C7	56	76.6246	354427	17601	collage3
31	C7	57	76.9268	349016	17239.8	collage3
31	C7	58	77.2291	344314	16906.7	collage3
31	C7	59	77.5313	338699	16635.5	collage3
31	C7	60	77.8335	333712	16434.3	collage3
31	C7	61	78.1358	328496	16292.5	collage3
31	C7	62	78.438	323397	16207.2	collage3
31	C7	63	78.7402	318170	16136.8	collage3
31	C7	64	79.0425	313171	16065.4	collage3
31	C7	65	79.3447	308352	15982.2	collage3
31	C7	66	79.6469	303453	15880.2	collage3
31	C7	67	79.9492	298455	15758.2	collage3
31	C7	68	80.2514	293905	15622.5	collage3
31	C7	69	80.5536	288989	15490.2	collage3
31	C7	70	80.8559	284656	15391.5	collage3
31	C7	71	81.1581	280210	15369.5	collage3
31	C7	72	81.4604	275447	15480	collage3
31	C7	73	81.7626	271175	15793.4	collage3
31	C7	74	82.0648	266480	16424.3	collage3
31	C7	75	82.3671	261152	17664.7	collage3
31	C7	76	82.6693	255922	19624.3	collage3
31	C7	77	82.9715	250712	22583.2	collage3
31	C7	78	83.2738	243537	26874.6	collage3
31	C7	79	83.576	235638	32825.6	collage3
31	C7	80	83.8782	225502	40640.3	collage3
31	C7	81	84.1805	213320	50236.8	collage3
31	C7	82	84.4827	197317	61086.5	collage3
31	C7	83	84.7849	173406	72139.9	collage3
31	C7	84	85.0872	140920	81919.1	collage3
31	C7	85	85.3894	99078.3	88796.5	collage3
31	C7	86	85.6916	60793.6	91391.3	collage3
31	C7	87	85.9939	29529.8	88952.2	collage3
31	C7	88	86.2961	10958.9	81594.8	collage3
31	C7	89	86.5983	2121.75	70306.8	collage3
31	C7	90	86.9006	-1612.94	56713.9	collage3
31	C7	91	87.2028	-3852.31	42668.3	collage3
31	C7	92	87.5051	-4790.21	29797.3	collage3
31	C7	93	87.8073	-5617.67	19168.9	collage3
31	C7	94	88.1095	-6239.23	12047.7	collage3
31	C7	95	88.4118	-6646.82	7468.22	collage3
31	C7	96	88.714	-7105.27	4533.71	collage3
31	C7	97	89.0162	-7115.78	2764.86	collage3
31	C7	98	89.3185	-7802.43	1744.17	collage3
31	C7	99	89.6207	-7244.25	1168.67	collage3
31	C7	100	89.9229	-7736.71	845.107	collage3
31	C7	101	90.2252	-8238.77	660.903	collage3
31	C7	102	90.5274	-8235.87	554.645	collage3
31	C7	103	90.8296	-8164.51	494.923	collage3
31	C7	104	91.1319	-8257.93	466.567	collage3
31	C7	105	91.4341	-8622.77	460.914	collage3
31	C7	106	91.7363	-8715.38	469.289	collage3
31	C7	107	92.0386	-9271.17	480.977	collage3
31	C7	108	92.3408	-9406.3	485.759	collage3
31	C7	109	92.643	-9197.16	478.178	collage3
31	C7	110	92.9453	-9736.53	459.533	collage3
31	C7	111	93.2475	-9416.29	435.834	collage3
31	C7	112	93.5497	-10165.3	413.414	collage3
31	C7	113	93.852	-9737.2	395.553	collage3
31	C7	114	94.1542	-10496.3	382.057	collage3
31	C7	115	94.4564	-10169	371.143	collage3
31	C7	116	94.7587	-10058.2	361.448	collage3
32	C8	1	60.0017	664969	14732.9	collage3
32	C8	2	60.3039	661803	15044.1	collage3
32	C8	3	60.6062	658059	15386.6	collage3
32	C8	4	60.9084	654497	15736.5	collage3
32	C8	5	61.2106	649912	16066.9	collage3
32	C8	6	61.5129	644737	16357.1	collage3
32	C8	7	61.8151	639312	16598.5	collage3
32	C8	8	62.1173	634275	16796	collage3
32	C8	9	62.4196	628672	16964.9	collage3
32	C8	10	62.7218	624102	17125	collage3
32	C8	11	63.024	618073	17321.7	collage3
32	C8	12	63.3263	612712	17533.6	collage3
32	C8	13	63.6285	607802	17752.4	collage3
32	C8	14	63.9307	602508	17957.6	collage3
32	C8	15	64.233	595682	18123.6	collage3
32	C8	16	64.5352	590331	18230.4	collage3
32	C8	17	64.8375	584607	18269.6	collage3
32	C8	18	65.1397	578627	18246	collage3
32	C8	19	65.4419	572573	18173.9	collage3
32	C8	20	65.7442	567178	18072.5	collage3
32	C8	21	66.0464	561074	17960.2	collage3
32	C8	22	66.3486	555894	17851.4	collage3
32	C8	23	66.6509	549945	17754.4	collage3
32	C8	24	66.9531	544906	17672.2	collage3
32	C8	25	67.2553	538845	17604.4	collage3
32	C8	26	67.5576	533068	17549.3	collage3
32	C8	27	67.8598	528035	17504	collage3
32	C8	28	68.162	522042	17463.9	collage3
32	C8	29	68.4643	516949	17422.9	collage3
32	C8	30	68.7665	510758	17375.5	collage3
32	C8	31	69.0687	505470	17318.6	collage3
32	C8	32	69.371	500387	17252.6	collage3
32	C8	33	69.6732	494753	17179.2	collage3
32	C8	34	69.9754	489671	17103.4	collage3
32	C8	35	70.2777	483638	17030.1	collage3
32	C8	36	70.5799	479238	16949.1	collage3
32	C8	37	70.8821	473324	16858.7	collage3
32	C8	38	71.1844	468620	16759.2	collage3
32	C8	39	71.4866	462856	16655.2	collage3
32	C8	40	71.7888	457990	16556.5	collage3
32	C8	41	72.0911	452749	16477	collage3
32	C8	42	72.3933	448225	16432.2	collage3
32	C8	43	72.6956	443187	16436.6	collage3
32	C8	44	72.9978	437697	16502.1	collage3
32	C8	45	73.3	433253	16638.8	collage3
32	C8	46	73.6023	428011	16853.9	collage3
32	C8	47	73.9045	423110	17152.7	collage3
32	C8	48	74.2067	417984	17578.8	collage3
32	C8	49	74.509	412087	18046.1	collage3
32	C8	50	74.8112	407064	18494.5	collage3
32	C8	51	75.1134	400981	18854.2	collage3
32	C8	52	75.4157	392704	19067.3	collage3
32	C8	53	75.7179	387208	19108.7	collage3
32	C8	54	76.0201	381741	18993.4	collage3
32	C8	55	76.3224	375319	18768	collage3
32	C8	56	76.6246	369287	18490.9	collage3
32	C8	57	76.9268	363889	18210.8	collage3
32	C8	58	77.2291	358744	17955.2	collage3
32	C8	59	77.5313	352513	17729.5	collage3
32	C8	60	77.8335	346716	17524.4	collage3
32	C8	61	78.1358	341210	17326	collage3
32	C8	62	78.438	336290	17124.2	collage3
32	C8	63	78.7402	331059	16946.7	collage3
32	C8	64	79.0425	324868	16765.2	collage3
32	C8	65	79.3447	320194	16586.4	collage3
32	C8	66	79.6469	315452	16420.8	collage3
32	C8	67	79.9492	310892	16279.7	collage3
32	C8	68	80.2514	305559	16172.4	collage3
32	C8	69	80.5536	300855	16104.7	collage3
32	C8	70	80.8559	296012	16084.3	collage3
32	C8	71	81.1581	290627	16130.7	collage3
32	C8	72	81.4604	285744	16285.3	collage3
32	C8	73	81.7626	281662	16619.8	collage3
32	C8	74	82.0648	276975	17262.2	collage3
32	C8	75	82.3671	270664	18509.9	collage3
32	C8	76	82.6693	265421	20509.5	collage3
32	C8	77	82.9715	259673	23565.2	collage3
32	C8	78	83.2738	253083	28028.1	collage3
32	C8	79	83.576	244355	34227.1	collage3
32	C8	80	83.8782	233201	42341.2	collage3
32	C8	81	84.1805	220479	52229.6	collage3
32	C8	82	84.4827	203066	63277.3	collage3
32	C8	83	84.7849	176726	74343.2	collage3
32	C8	84	85.0872	142215	83885	collage3
32	C8	85	85.3894	99208.9	90267.4	collage3
32	C8	86	85.6916	59876	92173.5	collage3
32	C8	87	85.9939	28929.9	88975.6	collage3
32	C8	88	86.2961	11076.6	80937	collage3
32	C8	89	86.5983	2994.55	69171.2	collage3
32	C8	90	86.9006	-740.177	55369.5	collage3
32	C8	91	87.2028	-2881.73	41376.7	collage3
32	C8	92	87.5051	-3390.35	28755.1	collage3
32	C8	93	87.8073	-4711.79	18481.2	collage3
32	C8	94	88.1095	-5048.97	11820.9	collage3
32	C8	95	88.4118	-5700.3	7429.04	collage3
32	C8	96	88.714	-6217.96	4654.75	collage3
32	C8	97	89.0162	-6503.19	3000.58	collage3
32	C8	98	89.3185	-7102.42	2044.15	collage3
32	C8	99	89.6207	-7377.85	1487.49	collage3
32	C8	100	89.9229	-7018.33	1149.39	collage3
32	C8	101	90.2252	-7675.18	931.967	collage3
32	C8	102	90.5274	-7449.61	785.17	collage3
32	C8	103	90.8296	-8131.74	681.572	collage3
32	C8	104	91.1319	-8139.29	604.059	collage3
32	C8	105	91.4341	-8334.67	542.697	collage3
32	C8	106	91.7363	-8156.89	494.43	collage3
32	C8	107	92.0386	-8333.88	460.666	collage3
32	C8	108	92.3408	-8649.04	442.387	collage3
32	C8	109	92.643	-8815.86	435.865	collage3
32	C8	110	92.9453	-8703.43	432.457	collage3
32	C8	111	93.2475	-9594.4	422.74	collage3
32	C8	112	93.5497	-9168.13	401.793	collage3
32	C8	113	93.852	-8900.79	371.582	collage3
32	C8	114	94.1542	-9374.6	338.74	collage3
32	C8	115	94.4564	-9964.49	309.652	collage3
32	C8	116	94.7587	-9115.33	286.689	collage3
33	C9	1	60.0012	645155	14061.2	collage3
33	C9	2	60.3036	642911	14322.1	collage3
33	C9	3	60.606	639396	14617.3	collage3
33	C9	4	60.9084	635242	14932.7	collage3
33	C9	5	61.2108	631550	15254.4	collage3
33	C9	6	61.5132	626263	15572.2	collage3
33	C9	7	61.8156	621527	15880.1	collage3
33	C9	8	62.118	617068	16172.9	collage3
33	C9	9	62.4204	611194	16447.3	collage3
33	C9	10	62.7229	607013	16693.7	collage3
33	C9	11	63.0253	601393	16887.2	collage3
33	C9	12	63.3277	595518	17019.7	collage3
33	C9	13	63.6301	590515	17094.1	collage3
33	C9	14	63.9325	584771	17124.6	collage3
33	C9	15	64.2349	579155	17132.3	collage3
33	C9	16	64.5373	573949	17136.2	collage3
33	C9	17	64.8397	568991	17147.6	collage3
33	C9	18	65.1421	563253	17168.4	collage3
33	C9	19	65.4445	557284	17193	collage3
33	C9	20	65.7469	552481	17213.1	collage3
33	C9	21	66.0493	546689	17221.1	collage3
33	C9	22	66.3517	541240	17211.4	collage3
33	C9	23	66.6541	535661	17180.3	collage3
33	C9	24	66.9565	530514	17126.7	collage3
33	C9	25	67.2589	524973	17052.8	collage3
33	C9	26	67.5614	519256	16965.8	collage3
33	C9	27	67.8638	513638	16875.8	collage3
33	C9	28	68.1662	509031	16793.7	collage3
33	C9	29	68.4686	503489	16726.3	collage3
33	C9	30	68.771	497796	16674.7	collage3
33	C9	31	69.0734	493024	16634.4	collage3
33	C9	32	69.3758	487546	16596.7	collage3
33	C9	33	69.6782	482555	16551.5	collage3
33	C9	34	69.9806	477186	16489.8	collage3
33	C9	35	70.283	472206	16407.8	collage3
33	C9	36	70.5854	466750	16311.9	collage3
33	C9	37	70.8878	461930	16215.7	collage3
33	C9	38	71.1902	456576	16130.9	collage3
33	C9	39	71.4926	452610	16068.4	collage3
33	C9	40	71.795	447425	16028.9	collage3
33	C9	41	72.0974	441858	16004.3	collage3
33	C9	42	72.3998	437029	15986.4	collage3
33	C9	43	72.7023	432419	15977.9	collage3
33	C9	44	73.0047	427068	15999.9	collage3
33	C9	45	73.3071	422243	16087.2	collage3
33	C9	46	73.6095	418126	16273.6	collage3
33	C9	47	73.9119	413640	16585.3	collage3
33	C9	48	74.2143	408241	16994.2	collage3
33	C9	49	74.5167	403399	17431.7	collage3
33	C9	50	74.8191	396444	17812	collage3
33	C9	51	75.1215	390379	18057.7	collage3
33	C9	52	75.4239	384227	18125.8	collage3
33	C9	53	75.7263	378258	18019.1	collage3
33	C9	54	76.0287	372812	17779.1	collage3
33	C9	55	76.3311	367609	17467	collage3
33	C9	56	76.6335	361645	17142	collage3
33	C9	57	76.9359	356577	16845.7	collage3
33	C9	58	77.2383	352372	16596.7	collage3
33	C9	59	77.5408	346007	16392.8	collage3
33	C9	60	77.8432	340480	16228.5	collage3
33	C9	61	78.1456	336281	16085	collage3
33	C9	62	78.448	330963	15953.9	collage3
33	C9	63	78.7504	325927	15836.5	collage3
33	C9	64	79.0528	320960	15736.8	collage3
33	C9	65	79.3552	316473	15657.9	collage3
33	C9	66	79.6576	311299	15598.6	collage3
33	C9	67	79.96	306736	15555.1	collage3
33	C9	68	80.2624	302181	15523.8	collage3
33	C9	69	80.5648	297116	15506.7	collage3
33	C9	70	80.8672	292818	15518.8	collage3
33	C9	71	81.1696	287292	15595.9	collage3
33	C9	72	81.472	283250	15804	collage3
33	C9	73	81.7744	278646	16245.7	collage3
33	C9	74	82.0768	274032	17109.7	collage3
33	C9	75	82.3792	268603	18585.9	collage3
33	C9	76	82.6817	263232	20927.5	collage3
33	C9	77	82.9841	256620	24442.5	collage3
33	C9	78	83.2865	249219	29452.2	collage3
33	C9	79	83.5889	238860	36203.2	collage3
33	C9	80	83.8913	226707	44721.5	collage3
33	C9	81	84.1937	210199	54639.5	collage3
33	C9	82	84.4961	186975	65073.6	collage3
33	C9	83	84.7985	153423	74655.4	collage3
33	C9	84	85.1009	114129	81776.8	collage3
33	C9	85	85.4033	71747.9	85007.1	collage3
33	C9	86	85.7057	39641.9	83530	collage3
33	C9	87	86.0081	18961	77409.2	collage3
33	C9	88	86.3105	8927.49	67569	collage3
33	C9	89	86.6129	5049.77	55511.5	collage3
33	C9	90	86.9153	2525.82	42903.9	collage3
33	C9	91	87.2177	1839.17	31188.6	collage3
33	C9	92	87.5202	568.824	21331	collage3
33	C9	93	87.8226	39.6109	13891.9	collage3
33	C9	94	88.125	-263.641	8818.17	collage3
33	C9	95	88.4274	-1069.13	5480.1	collage3
33	C9	96	88.7298	-944.587	3424.24	collage3
33	C9	97	89.0322	-1424.47	2221.98	collage3
33	C9	98	89.3346	-1805.43	1537.8	collage3
33	C9	99	89.637	-2114.1	1141.93	collage3
33	C9	100	89.9394	-2383.98	892.933	collage3
33	C9	101	90.2418	-2554.17	712.543	collage3
33	C9	102	90.5442	-2474.98	564.283	collage3
33	C9	103	90.8466	-2745.13	437.559	collage3
33	C9	104	91.149	-2772.38	335.567	collage3
33	C9	105	91.4514	-2575.79	265.563	collage3
33	C9	106	91.7538	-2684.97	231.527	collage3
33	C9	107	92.0562	-3339.6	230.006	collage3
33	C9	108	92.3586	-3069.34	249.576	collage3
33	C9	109	92.6611	-3163.73	273.599	collage3
33	C9	110	92.9635	-3739.64	285.112	collage3
33	C9	111	93.2659	-4056.92	272.296	collage3
33	C9	112	93.5683	-3657.72	232.597	collage3
33	C9	113	93.8707	-3498.24	173.556	collage3
33	C9	114	94.1731	-3991.88	109.253	collage3
33	C9	115	94.4755	-3938.69	53.6895	collage3
33	C9	116	94.7779	-3431.89	14.6641	collage3
34	C10	1	60.0012	662700	14625.4	collage3
34	C10	2	60.3036	658914	14923.4	collage3
34	C10	3	60.606	656277	15253.1	collage3
34	C10	4	60.9084	651902	15597.2	collage3
34	C10	5	61.2108	647503	15939.5	collage3
34	C10	6	61.5132	641898	16266.4	collage3
34	C10	7	61.8156	637715	16565.2	collage3
34	C10	8	62.118	632847	16824.2	collage3
34	C10	9	62.4204	626736	17037.5	collage3
34	C10	10	62.7229	621684	17199.8	collage3
34	C10	11	63.0253	615768	17325.8	collage3
34	C10	12	63.3277	610629	17439.3	collage3
34	C10	13	63.6301	605071	17560.7	collage3
34	C10	14	63.9325	600149	17696.2	collage3
34	C10	15	64.2349	594459	17833.2	collage3
34	C10	16	64.5373	588272	17946.2	collage3
34	C10	17	64.8397	582986	18008.8	collage3
34	C10	18	65.1421	576655	18005.6	collage3
34	C10	19	65.4445	570872	17938	collage3
34	C10	20	65.7469	565107	17824.2	collage3
34	C10	21	66.0493	559621	17692.7	collage3
34	C10	22	66.3517	553728	17571.4	collage3
34	C10	23	66.6541	548583	17477	collage3
34	C10	24	66.9565	543747	17410.8	collage3
34	C10	25	67.2589	538139	17361.7	collage3
34	C10	26	67.5614	531490	17316.4	collage3
34	C10	27	67.8638	526173	17268.2	collage3
34	C10	28	68.1662	521378	17218.8	collage3
34	C10	29	68.4686	515498	17172.5	collage3
34	C10	30	68.771	510746	17129.3	collage3
34	C10	31	69.0734	504324	17083.3	collage3
34	C10	32	69.3758	499481	17026.9	collage3
34	C10	33	69.6782	493738	16956	collage3
34	C10	34	69.9806	489358	16872.3	collage3
34	C10	35	70.283	483008	16781.4	collage3
34	C10	36	70.5854	478819	16692.6	collage3
34	C10	37	70.8878	473256	16609.1	collage3
34	C10	38	71.1902	467774	16534.1	collage3
34	C10	39	71.4926	463299	16468.1	collage3
34	C10	40	71.795	458407	16408.8	collage3
34	C10	41	72.0974	452462	16352.6	collage3
34	C10	42	72.3998	447857	16298.6	collage3
34	C10	43	72.7023	442938	16253.1	collage3
34	C10	44	73.0047	437977	16232.4	collage3
34	C10	45	73.3071	432924	16262.1	collage3
34	C10	46	73.6095	428170	16370.9	collage3
34	C10	47	73.9119	423907	16580.6	collage3
34	C10	48	74.2143	418256	16896.7	collage3
34	C10	49	74.5167	413689	17296.3	collage3
34	C10	50	74.8191	408466	17715.2	collage3
34	C10	51	75.1215	401469	18077.7	collage3
34	C10	52	75.4239	394804	18314.3	collage3
34	C10	53	75.7263	389118	18385.3	collage3
34	C10	54	76.0287	383108	18291.3	collage3
34	C10	55	76.3311	376868	18069.2	collage3
34	C10	56	76.6335	372039	17772.6	collage3
34	C10	57	76.9359	366213	17452.7	collage3
34	C10	58	77.2383	361303	17145.4	collage3
34	C10	59	77.5408	355151	16870	collage3
34	C10	60	77.8432	350004	16639.6	collage3
34	C10	61	78.1456	345274	16456.6	collage3
34	C10	62	78.448	340205	16321.2	collage3
34	C10	63	78.7504	335720	16229.4	collage3
34	C10	64	79.0528	329499	16168.3	collage3
34	C10	65	79.3552	324477	16119	collage3
34	C10	66	79.6576	319868	16065.1	collage3
34	C10	67	79.96	315440	15999.1	collage3
34	C10	68	80.2624	310294	15927.2	collage3
34	C10	69	80.5648	305273	15868.9	collage3
34	C10	70	80.8672	300354	15859.8	collage3
34	C10	71	81.1696	296159	15955	collage3
34	C10	72	81.472	291176	16233.5	collage3
34	C10	73	81.7744	286973	16801.5	collage3
34	C10	74	82.0768	281667	17824.9	collage3
34	C10	75	82.3792	276007	19475.4	collage3
34	C10	76	82.6817	269546	22000.9	collage3
34	C10	77	82.9841	263299	25709.4	collage3
34	C10	78	83.2865	255351	30927.8	collage3
34	C10	79	83.5889	244797	37897.9	collage3
34	C10	80	83.8913	231635	46611.1	collage3
34	C10	81	84.1937	212978	56628.3	collage3
34	C10	82	84.4961	188492	66972.7	collage3
34	C10	83	84.7985	152977	76196.1	collage3
34	C10	84	85.1009	111794	82665.5	collage3
34	C10	85	85.4033	69092.8	85009.7	collage3
34	C10	86	85.7057	38837.1	82555	collage3
34	C10	87	86.0081	20747.3	75555	collage3
34	C10	88	86.3105	11711.3	65110.8	collage3
34	C10	89	86.6129	8021.91	52830	collage3
34	C10	90	86.9153	6038.02	40382.9	collage3
34	C10	91	87.2177	5382.26	29123.3	collage3
34	C10	92	87.5202	4238.96	19877.7	collage3
34	C10	93	87.8226	3725.26	13026.4	collage3
34	C10	94	88.125	2660.55	8320.39	collage3
34	C10	95	88.4274	2132.63	5261.69	collage3
34	C10	96	88.7298	1920.17	3369.74	collage3
34	C10	97	89.0322	1215.56	2222.87	collage3
34	C10	98	89.3346	1893.52	1516.99	collage3
34	C10	99	89.637	834.528	1065.97	collage3
34	C10	100	89.9394	1413.89	770.118	collage3
34	C10	101	90.2418	1083.83	578.507	collage3
34	C10	102	90.5442	753.426	460.907	collage3
34	C10	103	90.8466	662.236	393.807	collage3
34	C10	104	91.149	237.699	357.291	collage3
34	C10	105	91.4514	658.893	336.725	collage3
34	C10	106	91.7538	266.086	324.074	collage3
34	C10	107	92.0562	-188.971	316.564	collage3
34	C10	108	92.3586	-63.6001	313.428	collage3
34	C10	109	92.6611	114.721	312.723	collage3
34	C10	110	92.9635	-490.682	310.115	collage3
34	C10	111	93.2659	-949.634	300.383	collage3
34	C10	112	93.5683	-956.215	280.904	collage3
34	C10	113	93.8707	-230.003	254.582	collage3
34	C10	114	94.1731	-691.841	229.285	collage3
34	C10	115	94.4755	-816.755	213.311	collage3
34	C10	116	94.7779	-1267.13	210.043	collage3
35	C11	1	60.0015	681402	15988.7	collage3
35	C11	2	60.3038	678000	16227.8	collage3
35	C11	3	60.6061	674451	16486.2	collage3
35	C11	4	60.9085	669675	16744.7	collage3
35	C11	5	61.2108	664666	16991	collage3
35	C11	6	61.5131	659423	17222	collage3
35	C11	7	61.8154	653662	17452.1	collage3
35	C11	8	62.1178	649563	17666.3	collage3
35	C11	9	62.4201	643401	17856	collage3
35	C11	10	62.7224	637621	18014.3	collage3
35	C11	11	63.0247	632232	18140.1	collage3
35	C11	12	63.3271	625476	18240	collage3
35	C11	13	63.6294	621133	18321.3	collage3
35	C11	14	63.9317	614857	18385.4	collage3
35	C11	15	64.234	610009	18427	collage3
35	C11	16	64.5364	602801	18440.6	collage3
35	C11	17	64.8387	596414	18426.7	collage3
35	C11	18	65.141	592129	18390.2	collage3
35	C11	19	65.4433	585998	18335	collage3
35	C11	20	65.7457	580241	18260.8	collage3
35	C11	21	66.048	573656	18167.8	collage3
35	C11	22	66.3503	568101	18062.7	collage3
35	C11	23	66.6526	562313	17959.5	collage3
35	C11	24	66.955	557678	17873.7	collage3
35	C11	25	67.2573	551610	17812.2	collage3
35	C11	26	67.5596	546022	17770.2	collage3
35	C11	27	67.8619	540030	17734.1	collage3
35	C11	28	68.1643	534830	17689.9	collage3
35	C11	29	68.4666	528804	17629	collage3
35	C11	30	68.7689	523474	17550.7	collage3
35	C11	31	69.0712	517353	17458.6	collage3
35	C11	32	69.3736	513063	17358.4	collage3
35	C11	33	69.6759	507246	17253.9	collage3
35	C11	34	69.9782	501466	17154.1	collage3
35	C11	35	70.2805	496265	17057.1	collage3
35	C11	36	70.5829	491409	16965.9	collage3
35	C11	37	70.8852	486468	16883.9	collage3
35	C11	38	71.1875	480844	16812.3	collage3
35	C11	39	71.4898	475018	16750.3	collage3
35	C11	40	71.7922	471241	16695.9	collage3
35	C11	41	72.0945	465127	16647.9	collage3
35	C11	42	72.3968	460350	16608.4	collage3
35	C11	43	72.6991	455449	16586.6	collage3
35	C11	44	73.0015	449878	16600.9	collage3
35	C11	45	73.3038	444851	16679.1	collage3
35	C11	46	73.6061	440827	16849.3	collage3
35	C11	47	73.9084	435689	17125.6	collage3
35	C11	48	74.2108	430274	17510.2	collage3
35	C11	49	74.5131	425059	17947	collage3
35	C11	50	74.8154	419741	18348.8	collage3
35	C11	51	75.1177	412241	18635.5	collage3
35	C11	52	75.4201	405345	18755.5	collage3
35	C11	53	75.7224	399527	18702.8	collage3
35	C11	54	76.0247	394402	18512.5	collage3
35	C11	55	76.327	389467	18240.2	collage3
35	C11	56	76.6294	381911	17939.2	collage3
35	C11	57	76.9317	377249	17648.9	collage3
35	C11	58	77.234	371630	17395	collage3
35	C11	59	77.5363	366388	17193.9	collage3
35	C11	60	77.8387	361630	17049.6	collage3
35	C11	61	78.141	355923	16939.2	collage3
35	C11	62	78.4433	349922	16840.6	collage3
35	C11	63	78.7456	344142	16734.1	collage3
35	C11	64	79.048	339549	16613.7	collage3
35	C11	65	79.3503	335639	16489.3	collage3
35	C11	66	79.6526	329442	16378.5	collage3
35	C11	67	79.9549	324606	16296.2	collage3
35	C11	68	80.2572	320277	16249.4	collage3
35	C11	69	80.5596	314986	16243	collage3
35	C11	70	80.8619	310264	16290.2	collage3
35	C11	71	81.1642	304498	16425	collage3
35	C11	72	81.4666	300688	16709.6	collage3
35	C11	73	81.7689	295290	17239.6	collage3
35	C11	74	82.0712	290689	18210.3	collage3
35	C11	75	82.3735	284963	19782.4	collage3
35	C11	76	82.6758	278167	22219.6	collage3
35	C11	77	82.9782	272008	25858.3	collage3
35	C11	78	83.2805	264485	31071.3	collage3
35	C11	79	83.5828	254243	38165.5	collage3
35	C11	80	83.8851	242413	47205.8	collage3
35	C11	81	84.1875	224814	57811.9	collage3
35	C11	82	84.4898	201139	69018.6	collage3
35	C11	83	84.7921	167024	79318.5	collage3
35	C11	84	85.0944	124312	86944.9	collage3
35	C11	85	85.3968	78996.1	90343.4	collage3
35	C11	86	85.6991	44748.4	88652.8	collage3
35	C11	87	86.0014	22843.7	81985.9	collage3
35	C11	88	86.3037	12432.3	71388.3	collage3
35	C11	89	86.6061	7392.08	58510.6	collage3
35	C11	90	86.9084	5608.38	45147.2	collage3
35	C11	91	87.2107	3779.93	32817.1	collage3
35	C11	92	87.513	2578.37	22505.5	collage3
35	C11	93	87.8154	2120.92	14767.8	collage3
35	C11	94	88.1177	1144.35	9518.04	collage3
35	C11	95	88.42	401.195	6039.79	collage3
35	C11	96	88.7223	400.421	3854.71	collage3
35	C11	97	89.0247	-373.449	2529.42	collage3
35	C11	98	89.327	-115.943	1742.13	collage3
35	C11	99	89.6293	-84.2276	1286.17	collage3
35	C11	100	89.9316	-622.063	1038.02	collage3
35	C11	101	90.234	-1009.98	918.537	collage3
35	C11	102	90.5363	-1509.19	866.462	collage3
35	C11	103	90.8386	-2143.53	829.939	collage3
35	C11	104	91.1409	-1989.43	771.234	collage3
35	C11	105	91.4433	-2456.77	674.479	collage3
35	C11	106	91.7456	-2586.08	547.615	collage3
35	C11	107	92.0479	-1906.99	415.012	collage3
35	C11	108	92.3502	-2401.45	303.363	collage3
35	C11	109	92.6526	-2077.57	227.701	collage3
35	C11	110	92.9549	-3061.98	184.77	collage3
35	C11	111	93.2572	-3107.33	157.145	collage3
35	C11	112	93.5595	-2845.25	124.879	collage3
35	C11	113	93.8619	-2529.69	76.5059	collage3
35	C11	114	94.1642	-2956.74	12.4219	collage3
35	C11	115	94.4665	-3150.17	-59.8945	collage3
35	C11	116	94.7688	-2840.44	-133.281	collage3
36	C12	1	60.0015	740369	16327.6	collage3
36	C12	2	60.3038	736643	16694.2	collage3
36	C12	3	60.6061	732869	17071.3	collage3
36	C12	4	60.9085	727804	17434.6	collage3
36	C12	5	61.2108	722576	17772.6	collage3
36	C12	6	61.5131	717218	18091.2	collage3
36	C12	7	61.8154	710995	18405.3	collage3
36	C12	8	62.1178	705268	18723.6	collage3
36	C12	9	62.4201	700800	19037	collage3
36	C12	10	62.7224	694683	19323.3	collage3
36	C12	11	63.0247	687739	19558.6	collage3
36	C12	12	63.3271	680376	19733.3	collage3
36	C12	13	63.6294	675210	19854.5	collage3
36	C12	14	63.9317	668974	19936.2	collage3
36	C12	15	64.234	662266	19985.8	collage3
36	C12	16	64.5364	656552	19997.1	collage3
36	C12	17	64.8387	649646	19959.7	collage3
36	C12	18	65.141	642604	19872.2	collage3
36	C12	19	65.4433	636843	19753	collage3
36	C12	20	65.7457	629295	19636.3	collage3
36	C12	21	66.048	624236	19556.5	collage3
36	C12	22	66.3503	618559	19530.2	collage3
36	C12	23	66.6526	612356	19547.6	collage3
36	C12	24	66.955	605815	19581.2	collage3
36	C12	25	67.2573	598645	19601.6	collage3
36	C12	26	67.5596	592721	19592.4	collage3
36	C12	27	67.8619	587240	19551.9	collage3
36	C12	28	68.1643	579780	19487.7	collage3
36	C12	29	68.4666	574201	19406.6	collage3
36	C12	30	68.7689	568180	19311.1	collage3
36	C12	31	69.0712	561669	19200.9	collage3
36	C12	32	69.3736	555265	19076.5	collage3
36	C12	33	69.6759	549831	18941.2	collage3
36	C12	34	69.9782	544496	18800.9	collage3
36	C12	35	70.2805	537498	18663.3	collage3
36	C12	36	70.5829	532846	18538.6	collage3
36	C12	37	70.8852	525609	18439.8	collage3
36	C12	38	71.1875	521084	18377.4	collage3
36	C12	39	71.4898	516031	18353.7	collage3
36	C12	40	71.7922	509741	18357.8	collage3
36	C12	41	72.0945	503343	18369.9	collage3
36	C12	42	72.3968	498125	18372.1	collage3
36	C12	43	72.6991	491765	18361.1	collage3
36	C12	44	73.0015	487144	18353.5	collage3
36	C12	45	73.3038	480893	18382.7	collage3
36	C12	46	73.6061	475299	18486	collage3
36	C12	47	73.9084	470257	18688.2	collage3
36	C12	48	74.2108	465145	18984.6	collage3
36	C12	49	74.5131	459277	19337.8	collage3
36	C12	50	74.8154	451932	19682.5	collage3
36	C12	51	75.1177	445732	19948.7	collage3
36	C12	52	75.4201	437897	20085.2	collage3
36	C12	53	75.7224	431656	20074.3	collage3
36	C12	54	76.0247	426030	19931	collage3
36	C12	55	76.327	419474	19689.7	collage3
36	C12	56	76.6294	411565	19390.7	collage3
36	C12	57	76.9317	407650	19070.5	collage3
36	C12	58	77.234	400820	18759.6	collage3
36	C12	59	77.5363	394850	18480.8	collage3
36	C12	60	77.8387	388833	18250.7	collage3
36	C12	61	78.141	384201	18076.1	collage3
36	C12	62	78.4433	377928	17953.5	collage3
36	C12	63	78.7456	372059	17870.9	collage3
36	C12	64	79.048	365974	17813.9	collage3
36	C12	65	79.3503	361188	17771.3	collage3
36	C12	66	79.6526	355395	17736.6	collage3
36	C12	67	79.9549	350308	17707.4	collage3
36	C12	68	80.2572	344962	17682.5	collage3
36	C12	69	80.5596	338641	17666.4	collage3
36	C12	70	80.8619	333735	17680.1	collage3
36	C12	71	81.1642	327795	17772.8	collage3
36	C12	72	81.4666	323343	18028.9	collage3
36	C12	73	81.7689	318459	18566.3	collage3
36	C12	74	82.0712	312478	19529.6	collage3
36	C12	75	82.3735	306345	21104.7	collage3
36	C12	76	82.6758	299761	23528.9	collage3
36	C12	77	82.9782	291931	27105.2	collage3
36	C12	78	83.2805	284037	32181.1	collage3
36	C12	79	83.5828	272643	39062.8	collage3
36	C12	80	83.8851	259918	47852.5	collage3
36	C12	81	84.1875	242900	58242.5	collage3
36	C12	82	84.4898	217747	69358.8	collage3
36	C12	83	84.7921	181684	79769.9	collage3
36	C12	84	85.0944	137785	87737.3	collage3
36	C12	85	85.3968	86663.2	91667.9	collage3
36	C12	86	85.6991	49133.6	90600.4	collage3
36	C12	87	86.0014	24444.2	84515.3	collage3
36	C12	88	86.3037	11080.8	74334.8	collage3
36	C12	89	86.6061	5920.08	61633.3	collage3
36	C12	90	86.9084	2742.38	48197.4	collage3
36	C12	91	87.2107	1373.71	35603.9	collage3
36	C12	92	87.513	932.363	24935.8	collage3
36	C12	93	87.8154	-768.122	16674.5	collage3
36	C12	94	88.1177	-1079.66	10774.8	collage3
36	C12	95	88.42	-2442.52	6872.83	collage3
36	C12	96	88.7223	-2652.04	4434.96	collage3
36	C12	97	89.0247	-3826.8	2952.92	collage3
36	C12	98	89.327	-3553.87	2039.9	collage3
36	C12	99	89.6293	-4011.46	1451.99	collage3
36	C12	100	89.9316	-3256.63	1059.22	collage3
36	C12	101	90.234	-4158.72	797.477	collage3
36	C12	102	90.5363	-4732.85	627.727	collage3
36	C12	103	90.8386	-5158.18	515.867	collage3
36	C12	104	91.1409	-4571.59	432.371	collage3
36	C12	105	91.4433	-5604.72	359.859	collage3
36	C12	106	91.7456	-4742.6	295.793	collage3
36	C12	107	92.0479	-4650.33	245.562	collage3
36	C12	108	92.3502	-6214.02	211.66	collage3
36	C12	109	92.6526	-5934.52	188.404	collage3
36	C12	110	92.9549	-5572.77	166.135	collage3
36	C12	111	93.2572	-6074.64	139.98	collage3
36	C12	112	93.5595	-6073.08	114.34	collage3
36	C12	113	93.8619	-5337.77	98.8145	collage3
36	C12	114	94.1642	-6818.05	99.4473	collage3
36	C12	115	94.4665	-7179.27	113.014	collage3
36	C12	116	94.7688	-5984.75	128.844	collage3
43	D7	1	60.0017	487930	10188.1	ctgf
43	D7	2	60.3039	486139	10332.1	ctgf
43	D7	3	60.6062	483807	10490.6	ctgf
43	D7	4	60.9084	481011	10655.3	ctgf
43	D7	5	61.2106	477107	10820.6	ctgf
43	D7	6	61.5129	474376	10984.2	ctgf
43	D7	7	61.8151	471259	11144.8	ctgf
43	D7	8	62.1173	467259	11303.3	ctgf
43	D7	9	62.4196	463707	11463.9	ctgf
43	D7	10	62.7218	460664	11597.1	ctgf
43	D7	11	63.024	456161	11695.3	ctgf
43	D7	12	63.3263	452703	11756	ctgf
43	D7	13	63.6285	449244	11782.8	ctgf
43	D7	14	63.9307	444896	11784.5	ctgf
43	D7	15	64.233	441703	11774.1	ctgf
43	D7	16	64.5352	437338	11765.8	ctgf
43	D7	17	64.8375	434061	11771.4	ctgf
43	D7	18	65.1397	430118	11795.2	ctgf
43	D7	19	65.4419	426893	11832.9	ctgf
43	D7	20	65.7442	422606	11873.4	ctgf
43	D7	21	66.0464	418925	11904.9	ctgf
43	D7	22	66.3486	414794	11919.8	ctgf
43	D7	23	66.6509	411122	11915	ctgf
43	D7	24	66.9531	407599	11889.3	ctgf
43	D7	25	67.2553	403879	11841	ctgf
43	D7	26	67.5576	399582	11770	ctgf
43	D7	27	67.8598	395899	11682.3	ctgf
43	D7	28	68.162	391762	11592.7	ctgf
43	D7	29	68.4643	388631	11519.3	ctgf
43	D7	30	68.7665	385137	11475.8	ctgf
43	D7	31	69.0687	381374	11462.3	ctgf
43	D7	32	69.371	378099	11463.9	ctgf
43	D7	33	69.6732	373836	11457	ctgf
43	D7	34	69.9754	370193	11419.8	ctgf
43	D7	35	70.2777	367226	11341.8	ctgf
43	D7	36	70.5799	362641	11233.7	ctgf
43	D7	37	70.8821	359549	11122.7	ctgf
43	D7	38	71.1844	356442	11021	ctgf
43	D7	39	71.4866	352622	10948.2	ctgf
43	D7	40	71.7888	350052	10912.5	ctgf
43	D7	41	72.0911	346531	10909.2	ctgf
43	D7	42	72.3933	342347	10923.8	ctgf
43	D7	43	72.6956	339462	10939.9	ctgf
43	D7	44	72.9978	335978	10945.7	ctgf
43	D7	45	73.3	332584	10936.2	ctgf
43	D7	46	73.6023	329400	10913.3	ctgf
43	D7	47	73.9045	325523	10884.7	ctgf
43	D7	48	74.2067	322608	10862.7	ctgf
43	D7	49	74.509	319530	10865.1	ctgf
43	D7	50	74.8112	315340	10913.1	ctgf
43	D7	51	75.1134	312346	11025.4	ctgf
43	D7	52	75.4157	309146	11208.9	ctgf
43	D7	53	75.7179	305657	11478.3	ctgf
43	D7	54	76.0201	302029	11778	ctgf
43	D7	55	76.3224	297222	12037.9	ctgf
43	D7	56	76.6246	292322	12201.5	ctgf
43	D7	57	76.9268	289180	12237.4	ctgf
43	D7	58	77.2291	284844	12148.2	ctgf
43	D7	59	77.5313	280977	11964.5	ctgf
43	D7	60	77.8335	277154	11730.3	ctgf
43	D7	61	78.1358	274179	11486.4	ctgf
43	D7	62	78.438	270081	11261.9	ctgf
43	D7	63	78.7402	267064	11097.6	ctgf
43	D7	64	79.0425	263085	10970.5	ctgf
43	D7	65	79.3447	259880	10890.7	ctgf
43	D7	66	79.6469	256882	10878.3	ctgf
43	D7	67	79.9492	253576	10969	ctgf
43	D7	68	80.2514	250512	11219.4	ctgf
43	D7	69	80.5536	247053	11791.8	ctgf
43	D7	70	80.8559	243533	12823.9	ctgf
43	D7	71	81.1581	239392	14554.5	ctgf
43	D7	72	81.4604	235634	17318.8	ctgf
43	D7	73	81.7626	231468	21500.5	ctgf
43	D7	74	82.0648	226539	27429.8	ctgf
43	D7	75	82.3671	218805	35222.5	ctgf
43	D7	76	82.6693	206392	44609.1	ctgf
43	D7	77	82.9715	189529	54826.4	ctgf
43	D7	78	83.2738	163245	64654	ctgf
43	D7	79	83.576	129428	72629.3	ctgf
43	D7	80	83.8782	96975	77399	ctgf
43	D7	81	84.1805	70213.1	78086	ctgf
43	D7	82	84.4827	48539.4	74530.6	ctgf
43	D7	83	84.7849	30941.5	67313.8	ctgf
43	D7	84	85.0872	19225.6	57569.1	ctgf
43	D7	85	85.3894	12082.7	46670.4	ctgf
43	D7	86	85.6916	7794.69	35912.9	ctgf
43	D7	87	85.9939	6022.25	26277.9	ctgf
43	D7	88	86.2961	4663.85	18325.7	ctgf
43	D7	89	86.5983	3194.77	12212.9	ctgf
43	D7	90	86.9006	2765.27	8276.18	ctgf
43	D7	91	87.2028	2244.33	5667.71	ctgf
43	D7	92	87.5051	1777.73	3956.55	ctgf
43	D7	93	87.8073	1365.44	2873.22	ctgf
43	D7	94	88.1095	850.887	2205.4	ctgf
43	D7	95	88.4118	661.466	1797.92	ctgf
43	D7	96	88.714	180.33	1541.92	ctgf
43	D7	97	89.0162	-420.409	1363.86	ctgf
43	D7	98	89.3185	-897.067	1218.04	ctgf
43	D7	99	89.6207	-599.119	1081.36	ctgf
43	D7	100	89.9229	-915.353	947.735	ctgf
43	D7	101	90.2252	-1195.16	821.105	ctgf
43	D7	102	90.5274	-1343	708.384	ctgf
43	D7	103	90.8296	-1284.37	614.483	ctgf
43	D7	104	91.1319	-1453.71	540.408	ctgf
43	D7	105	91.4341	-1674.06	483.554	ctgf
43	D7	106	91.7363	-1472.36	438.905	ctgf
43	D7	107	92.0386	-1930.02	400.638	ctgf
43	D7	108	92.3408	-2098.87	364.154	ctgf
43	D7	109	92.643	-1720.53	327.992	ctgf
43	D7	110	92.9453	-2025.41	294.199	ctgf
43	D7	111	93.2475	-1774.02	266.358	ctgf
43	D7	112	93.5497	-2068.33	246.277	ctgf
43	D7	113	93.852	-2217.17	231.832	ctgf
43	D7	114	94.1542	-2119.15	217.78	ctgf
43	D7	115	94.4564	-2444.9	198.911	ctgf
43	D7	116	94.7587	-1966.64	173.021	ctgf
44	D8	1	60.0017	431200	9114.24	ctgf
44	D8	2	60.3039	428922	9250.86	ctgf
44	D8	3	60.6062	426913	9377.5	ctgf
44	D8	4	60.9084	423467	9493.73	ctgf
44	D8	5	61.2106	420932	9608.37	ctgf
44	D8	6	61.5129	418791	9734.17	ctgf
44	D8	7	61.8151	416013	9879.62	ctgf
44	D8	8	62.1173	412115	10044.7	ctgf
44	D8	9	62.4196	409290	10224.9	ctgf
44	D8	10	62.7218	406559	10402.3	ctgf
44	D8	11	63.024	403204	10557.9	ctgf
44	D8	12	63.3263	399225	10674.8	ctgf
44	D8	13	63.6285	396713	10741.5	ctgf
44	D8	14	63.9307	392644	10755.7	ctgf
44	D8	15	64.233	389094	10726.6	ctgf
44	D8	16	64.5352	385879	10673.4	ctgf
44	D8	17	64.8375	382432	10620	ctgf
44	D8	18	65.1397	379236	10587.3	ctgf
44	D8	19	65.4419	376021	10586.7	ctgf
44	D8	20	65.7442	372981	10617.9	ctgf
44	D8	21	66.0464	369130	10670.1	ctgf
44	D8	22	66.3486	365975	10726.6	ctgf
44	D8	23	66.6509	362670	10769.3	ctgf
44	D8	24	66.9531	359342	10783	ctgf
44	D8	25	67.2553	355660	10760.1	ctgf
44	D8	26	67.5576	351637	10703.1	ctgf
44	D8	27	67.8598	349043	10623.4	ctgf
44	D8	28	68.162	345262	10536.8	ctgf
44	D8	29	68.4643	342040	10456.8	ctgf
44	D8	30	68.7665	339144	10390	ctgf
44	D8	31	69.0687	335797	10336.6	ctgf
44	D8	32	69.371	332058	10293.9	ctgf
44	D8	33	69.6732	329411	10259.5	ctgf
44	D8	34	69.9754	325979	10232.2	ctgf
44	D8	35	70.2777	323115	10210.2	ctgf
44	D8	36	70.5799	319985	10189.1	ctgf
44	D8	37	70.8821	316328	10163.4	ctgf
44	D8	38	71.1844	313852	10130.6	ctgf
44	D8	39	71.4866	309793	10092.9	ctgf
44	D8	40	71.7888	307158	10057.2	ctgf
44	D8	41	72.0911	304792	10026.9	ctgf
44	D8	42	72.3933	301108	9999.72	ctgf
44	D8	43	72.6956	297901	9968.31	ctgf
44	D8	44	72.9978	295284	9925.42	ctgf
44	D8	45	73.3	291613	9870.75	ctgf
44	D8	46	73.6023	288769	9812.8	ctgf
44	D8	47	73.9045	286468	9765.01	ctgf
44	D8	48	74.2067	283476	9738.63	ctgf
44	D8	49	74.509	280029	9738.72	ctgf
44	D8	50	74.8112	277594	9765.47	ctgf
44	D8	51	75.1134	273880	9819.25	ctgf
44	D8	52	75.4157	270775	9903.23	ctgf
44	D8	53	75.7179	267936	10019.4	ctgf
44	D8	54	76.0201	265180	10162.9	ctgf
44	D8	55	76.3224	261798	10311.1	ctgf
44	D8	56	76.6246	257466	10427	ctgf
44	D8	57	76.9268	254137	10477.2	ctgf
44	D8	58	77.2291	250631	10443.6	ctgf
44	D8	59	77.5313	247437	10331.1	ctgf
44	D8	60	77.8335	244526	10163.8	ctgf
44	D8	61	78.1358	240750	9979.41	ctgf
44	D8	62	78.438	238285	9809.41	ctgf
44	D8	63	78.7402	235487	9675.83	ctgf
44	D8	64	79.0425	232367	9594.57	ctgf
44	D8	65	79.3447	229280	9575.86	ctgf
44	D8	66	79.6469	226621	9631.63	ctgf
44	D8	67	79.9492	223856	9786.14	ctgf
44	D8	68	80.2514	220623	10089.4	ctgf
44	D8	69	80.5536	217936	10651.7	ctgf
44	D8	70	80.8559	214515	11619.7	ctgf
44	D8	71	81.1581	211713	13222.7	ctgf
44	D8	72	81.4604	207687	15755.3	ctgf
44	D8	73	81.7626	203892	19532.6	ctgf
44	D8	74	82.0648	199110	24795.8	ctgf
44	D8	75	82.3671	191198	31577.5	ctgf
44	D8	76	82.6693	180327	39562	ctgf
44	D8	77	82.9715	163320	48011.8	ctgf
44	D8	78	83.2738	138718	55823.3	ctgf
44	D8	79	83.576	106985	61741.7	ctgf
44	D8	80	83.8782	79304.4	64682.9	ctgf
44	D8	81	84.1805	56452	64047.4	ctgf
44	D8	82	84.4827	39174.4	59898	ctgf
44	D8	83	84.7849	25711.4	52930	ctgf
44	D8	84	85.0872	18145.9	44255.9	ctgf
44	D8	85	85.3894	14002	35099.8	ctgf
44	D8	86	85.6916	11173.4	26513.3	ctgf
44	D8	87	85.9939	9961.99	19195	ctgf
44	D8	88	86.2961	8220.85	13442.1	ctgf
44	D8	89	86.5983	7118.31	9244.47	ctgf
44	D8	90	86.9006	6155.69	6395.73	ctgf
44	D8	91	87.2028	5665.83	4481.13	ctgf
44	D8	92	87.5051	5683.04	3219.62	ctgf
44	D8	93	87.8073	5148.17	2396.72	ctgf
44	D8	94	88.1095	4373.99	1863.8	ctgf
44	D8	95	88.4118	4251.66	1518.64	ctgf
44	D8	96	88.714	3863.61	1287.39	ctgf
44	D8	97	89.0162	3170.46	1115.93	ctgf
44	D8	98	89.3185	2805.42	968.344	ctgf
44	D8	99	89.6207	3080.84	826.602	ctgf
44	D8	100	89.9229	2670.22	687.399	ctgf
44	D8	101	90.2252	2452.63	556.356	ctgf
44	D8	102	90.5274	1994.82	441.578	ctgf
44	D8	103	90.8296	2870.92	348.721	ctgf
44	D8	104	91.1319	1983.73	278.461	ctgf
44	D8	105	91.4341	1880.44	226.627	ctgf
44	D8	106	91.7363	1978.43	186.831	ctgf
44	D8	107	92.0386	1475.73	154.277	ctgf
44	D8	108	92.3408	1808.01	128.024	ctgf
44	D8	109	92.643	2061.15	109.485	ctgf
44	D8	110	92.9453	1525.59	98.0986	ctgf
44	D8	111	93.2475	997.023	88.335	ctgf
44	D8	112	93.5497	1145.28	71.5654	ctgf
44	D8	113	93.852	1408.69	41.8262	ctgf
44	D8	114	94.1542	1160.08	0.423828	ctgf
44	D8	115	94.4564	1390.44	-44.7793	ctgf
44	D8	116	94.7587	1231.84	-84.7373	ctgf
45	D9	1	60.0012	502540	10369.1	ctgf
45	D9	2	60.3036	500007	10560.5	ctgf
45	D9	3	60.606	498132	10762.5	ctgf
45	D9	4	60.9084	493253	10971.3	ctgf
45	D9	5	61.2108	491801	11185.9	ctgf
45	D9	6	61.5132	488752	11404.2	ctgf
45	D9	7	61.8156	484419	11619.4	ctgf
45	D9	8	62.118	481132	11820.2	ctgf
45	D9	9	62.4204	477055	12011.5	ctgf
45	D9	10	62.7229	474084	12167.3	ctgf
45	D9	11	63.0253	469287	12287.6	ctgf
45	D9	12	63.3277	465900	12379.9	ctgf
45	D9	13	63.6301	461923	12454.8	ctgf
45	D9	14	63.9325	457978	12520.3	ctgf
45	D9	15	64.2349	454107	12577.7	ctgf
45	D9	16	64.5373	450243	12620.3	ctgf
45	D9	17	64.8397	446212	12637.7	ctgf
45	D9	18	65.1421	441794	12620.5	ctgf
45	D9	19	65.4445	438216	12567.5	ctgf
45	D9	20	65.7469	433656	12488.5	ctgf
45	D9	21	66.0493	429957	12403	ctgf
45	D9	22	66.3517	426188	12334.4	ctgf
45	D9	23	66.6541	422239	12300	ctgf
45	D9	24	66.9565	418791	12303.6	ctgf
45	D9	25	67.2589	415103	12332.2	ctgf
45	D9	26	67.5614	410710	12360.4	ctgf
45	D9	27	67.8638	406856	12361.8	ctgf
45	D9	28	68.1662	402729	12320	ctgf
45	D9	29	68.4686	398477	12235.5	ctgf
45	D9	30	68.771	394810	12124.4	ctgf
45	D9	31	69.0734	391242	12009.5	ctgf
45	D9	32	69.3758	387816	11910.2	ctgf
45	D9	33	69.6782	383978	11836.6	ctgf
45	D9	34	69.9806	379901	11792.6	ctgf
45	D9	35	70.283	376913	11769.6	ctgf
45	D9	36	70.5854	372621	11760.1	ctgf
45	D9	37	70.8878	369702	11755.9	ctgf
45	D9	38	71.1902	365842	11746.6	ctgf
45	D9	39	71.4926	361829	11721.9	ctgf
45	D9	40	71.795	358385	11675.2	ctgf
45	D9	41	72.0974	354369	11608.3	ctgf
45	D9	42	72.3998	351205	11530.7	ctgf
45	D9	43	72.7023	347785	11456.6	ctgf
45	D9	44	73.0047	344509	11399.5	ctgf
45	D9	45	73.3071	340654	11370.7	ctgf
45	D9	46	73.6095	337482	11379.8	ctgf
45	D9	47	73.9119	333972	11436.9	ctgf
45	D9	48	74.2143	330497	11551.5	ctgf
45	D9	49	74.5167	327809	11727.4	ctgf
45	D9	50	74.8191	323173	11969.8	ctgf
45	D9	51	75.1215	319648	12255.9	ctgf
45	D9	52	75.4239	315686	12536.8	ctgf
45	D9	53	75.7263	311783	12766.3	ctgf
45	D9	54	76.0287	306557	12903.7	ctgf
45	D9	55	76.3311	302241	12927.4	ctgf
45	D9	56	76.6335	298367	12842	ctgf
45	D9	57	76.9359	294439	12676.1	ctgf
45	D9	58	77.2383	290575	12470	ctgf
45	D9	59	77.5408	286970	12260.2	ctgf
45	D9	60	77.8432	282710	12069.1	ctgf
45	D9	61	78.1456	279493	11903.4	ctgf
45	D9	62	78.448	275203	11765.8	ctgf
45	D9	63	78.7504	272234	11653	ctgf
45	D9	64	79.0528	267829	11564.7	ctgf
45	D9	65	79.3552	264631	11523.1	ctgf
45	D9	66	79.6576	261846	11571.7	ctgf
45	D9	67	79.96	258038	11780.4	ctgf
45	D9	68	80.2624	254428	12297.2	ctgf
45	D9	69	80.5648	251295	13281.4	ctgf
45	D9	70	80.8672	247877	14972.2	ctgf
45	D9	71	81.1696	242955	17693.1	ctgf
45	D9	72	81.472	237918	21821.2	ctgf
45	D9	73	81.7744	232323	27703	ctgf
45	D9	74	82.0768	225137	35504.2	ctgf
45	D9	75	82.3792	213774	45025.1	ctgf
45	D9	76	82.6817	193476	55560	ctgf
45	D9	77	82.9841	166057	65896.6	ctgf
45	D9	78	83.2865	131942	74510.3	ctgf
45	D9	79	83.5889	96296.9	79925.8	ctgf
45	D9	80	83.8913	66716	81121.3	ctgf
45	D9	81	84.1937	43723	77819.5	ctgf
45	D9	82	84.4961	27100.2	70552.1	ctgf
45	D9	83	84.7985	15213.8	60485.3	ctgf
45	D9	84	85.1009	8953.06	49090.7	ctgf
45	D9	85	85.4033	5546.25	37788.8	ctgf
45	D9	86	85.7057	3687.73	27675.7	ctgf
45	D9	87	86.0081	2118.39	19387.9	ctgf
45	D9	88	86.3105	841.385	13106.8	ctgf
45	D9	89	86.6129	-353.077	8946.17	ctgf
45	D9	90	86.9153	-1141.49	6250.76	ctgf
45	D9	91	87.2177	-1569.53	4536.23	ctgf
45	D9	92	87.5202	-1992.37	3474.58	ctgf
45	D9	93	87.8226	-3143.52	2816.21	ctgf
45	D9	94	88.125	-3958.09	2387.31	ctgf
45	D9	95	88.4274	-4197	2072.9	ctgf
45	D9	96	88.7298	-4921.4	1801.79	ctgf
45	D9	97	89.0322	-5437.14	1537.54	ctgf
45	D9	98	89.3346	-5119.97	1271.31	ctgf
45	D9	99	89.637	-5425.71	1012.43	ctgf
45	D9	100	89.9394	-5571.39	777.4	ctgf
45	D9	101	90.2418	-6167.8	581.044	ctgf
45	D9	102	90.5442	-5741.02	432.3	ctgf
45	D9	103	90.8466	-5379.97	333.653	ctgf
45	D9	104	91.149	-6121.65	281.312	ctgf
45	D9	105	91.4514	-6231.15	265.015	ctgf
45	D9	106	91.7538	-6246.18	269.224	ctgf
45	D9	107	92.0562	-6811.81	277.481	ctgf
45	D9	108	92.3586	-6488.82	278.56	ctgf
45	D9	109	92.6611	-6683.85	270.301	ctgf
45	D9	110	92.9635	-6735.72	258.032	ctgf
45	D9	111	93.2659	-6803.42	248.683	ctgf
45	D9	112	93.5683	-7156.5	245.08	ctgf
45	D9	113	93.8707	-7415.52	244.568	ctgf
45	D9	114	94.1731	-7468.38	242.307	ctgf
45	D9	115	94.4755	-7452.87	235.87	ctgf
45	D9	116	94.7779	-6883.01	227.161	ctgf
46	D10	1	60.0012	504484	11151.1	ctgf
46	D10	2	60.3036	502174	11316.6	ctgf
46	D10	3	60.606	499156	11487.1	ctgf
46	D10	4	60.9084	496323	11639.9	ctgf
46	D10	5	61.2108	492893	11763.6	ctgf
46	D10	6	61.5132	488553	11862.5	ctgf
46	D10	7	61.8156	485020	11959.6	ctgf
46	D10	8	62.118	481731	12062.7	ctgf
46	D10	9	62.4204	478043	12173.7	ctgf
46	D10	10	62.7229	474230	12282.6	ctgf
46	D10	11	63.0253	470648	12375.3	ctgf
46	D10	12	63.3277	465804	12443.8	ctgf
46	D10	13	63.6301	462008	12491.5	ctgf
46	D10	14	63.9325	458012	12527.5	ctgf
46	D10	15	64.2349	454837	12557.2	ctgf
46	D10	16	64.5373	450494	12577.8	ctgf
46	D10	17	64.8397	446056	12580.7	ctgf
46	D10	18	65.1421	441921	12558.8	ctgf
46	D10	19	65.4445	438184	12512.5	ctgf
46	D10	20	65.7469	434213	12451.7	ctgf
46	D10	21	66.0493	430078	12393.4	ctgf
46	D10	22	66.3517	425783	12355.7	ctgf
46	D10	23	66.6541	422472	12351.2	ctgf
46	D10	24	66.9565	418739	12379.1	ctgf
46	D10	25	67.2589	414981	12423.5	ctgf
46	D10	26	67.5614	410557	12459	ctgf
46	D10	27	67.8638	406129	12462.4	ctgf
46	D10	28	68.1662	402279	12422.8	ctgf
46	D10	29	68.4686	398340	12345.5	ctgf
46	D10	30	68.771	394282	12247.6	ctgf
46	D10	31	69.0734	390409	12148.7	ctgf
46	D10	32	69.3758	387311	12063.2	ctgf
46	D10	33	69.6782	382995	11997.2	ctgf
46	D10	34	69.9806	379004	11949.8	ctgf
46	D10	35	70.283	375667	11916.1	ctgf
46	D10	36	70.5854	372082	11889.1	ctgf
46	D10	37	70.8878	368153	11861.5	ctgf
46	D10	38	71.1902	364576	11825.7	ctgf
46	D10	39	71.4926	360367	11774.9	ctgf
46	D10	40	71.795	356927	11708.4	ctgf
46	D10	41	72.0974	353610	11630.7	ctgf
46	D10	42	72.3998	349405	11548.9	ctgf
46	D10	43	72.7023	346590	11469.8	ctgf
46	D10	44	73.0047	342636	11398.2	ctgf
46	D10	45	73.3071	339422	11338.3	ctgf
46	D10	46	73.6095	335379	11295.7	ctgf
46	D10	47	73.9119	332721	11279.8	ctgf
46	D10	48	74.2143	329113	11303	ctgf
46	D10	49	74.5167	325508	11377.2	ctgf
46	D10	50	74.8191	321875	11509.4	ctgf
46	D10	51	75.1215	318526	11694.7	ctgf
46	D10	52	75.4239	314499	11914.7	ctgf
46	D10	53	75.7263	311270	12143.9	ctgf
46	D10	54	76.0287	306444	12313.2	ctgf
46	D10	55	76.3311	301012	12382.6	ctgf
46	D10	56	76.6335	297468	12339.7	ctgf
46	D10	57	76.9359	294266	12204.9	ctgf
46	D10	58	77.2383	290423	12018.6	ctgf
46	D10	59	77.5408	286500	11826.8	ctgf
46	D10	60	77.8432	282224	11663.6	ctgf
46	D10	61	78.1456	279303	11525.2	ctgf
46	D10	62	78.448	275644	11412.1	ctgf
46	D10	63	78.7504	271733	11324.5	ctgf
46	D10	64	79.0528	268082	11270.8	ctgf
46	D10	65	79.3552	264868	11274.4	ctgf
46	D10	66	79.6576	261575	11379.3	ctgf
46	D10	67	79.96	258329	11656.4	ctgf
46	D10	68	80.2624	254710	12246.7	ctgf
46	D10	69	80.5648	251633	13340.3	ctgf
46	D10	70	80.8672	246954	15163.4	ctgf
46	D10	71	81.1696	242788	18043.6	ctgf
46	D10	72	81.472	238123	22353.9	ctgf
46	D10	73	81.7744	231754	28415.7	ctgf
46	D10	74	82.0768	224518	36339.5	ctgf
46	D10	75	82.3792	210858	45845.3	ctgf
46	D10	76	82.6817	190405	56146.3	ctgf
46	D10	77	82.9841	162287	65983.5	ctgf
46	D10	78	83.2865	127025	73852.3	ctgf
46	D10	79	83.5889	92354.3	78374.5	ctgf
46	D10	80	83.8913	64882.9	78685.6	ctgf
46	D10	81	84.1937	43207.1	74683.1	ctgf
46	D10	82	84.4961	27906.9	67038.3	ctgf
46	D10	83	84.7985	17863.2	56978.4	ctgf
46	D10	84	85.1009	11756.2	45942	ctgf
46	D10	85	85.4033	8426.75	35238.3	ctgf
46	D10	86	85.7057	5796.79	25815.6	ctgf
46	D10	87	86.0081	4143.11	18174.2	ctgf
46	D10	88	86.3105	3139.43	12408.3	ctgf
46	D10	89	86.6129	2229.12	8649.44	ctgf
46	D10	90	86.9153	1101.85	6157.73	ctgf
46	D10	91	87.2177	526.586	4548.85	ctgf
46	D10	92	87.5202	-80.1746	3529.5	ctgf
46	D10	93	87.8226	-865.181	2875.56	ctgf
46	D10	94	88.125	-1577.3	2431.2	ctgf
46	D10	95	88.4274	-2028.93	2095.95	ctgf
46	D10	96	88.7298	-2889.77	1811.37	ctgf
46	D10	97	89.0322	-2519.51	1550.74	ctgf
46	D10	98	89.3346	-3021.72	1310.11	ctgf
46	D10	99	89.637	-3260.5	1098.59	ctgf
46	D10	100	89.9394	-3472.25	928.135	ctgf
46	D10	101	90.2418	-3533.28	804.982	ctgf
46	D10	102	90.5442	-3428.24	725.19	ctgf
46	D10	103	90.8466	-4312.72	675.173	ctgf
46	D10	104	91.149	-4754.74	636.979	ctgf
46	D10	105	91.4514	-4501.78	596.016	ctgf
46	D10	106	91.7538	-4395.29	547.081	ctgf
46	D10	107	92.0562	-4779.7	494.807	ctgf
46	D10	108	92.3586	-4755.45	448.04	ctgf
46	D10	109	92.6611	-5261.79	412.3	ctgf
46	D10	110	92.9635	-5069.31	385.688	ctgf
46	D10	111	93.2659	-5368.79	360.579	ctgf
46	D10	112	93.5683	-5652.03	328.865	ctgf
46	D10	113	93.8707	-5447.92	286.632	ctgf
46	D10	114	94.1731	-5519.14	235.52	ctgf
46	D10	115	94.4755	-5555.66	180.784	ctgf
46	D10	116	94.7779	-5594.83	127.938	ctgf
47	D11	1	60.0015	508937	11231.5	ctgf
47	D11	2	60.3038	505454	11416.7	ctgf
47	D11	3	60.6061	503777	11609.8	ctgf
47	D11	4	60.9085	500036	11792.4	ctgf
47	D11	5	61.2108	496694	11956.5	ctgf
47	D11	6	61.5131	492935	12091.1	ctgf
47	D11	7	61.8154	489353	12202.6	ctgf
47	D11	8	62.1178	485382	12301.3	ctgf
47	D11	9	62.4201	482008	12397.8	ctgf
47	D11	10	62.7224	477887	12497.6	ctgf
47	D11	11	63.0247	473978	12600.9	ctgf
47	D11	12	63.3271	470939	12702.1	ctgf
47	D11	13	63.6294	465884	12791.2	ctgf
47	D11	14	63.9317	462104	12855.7	ctgf
47	D11	15	64.234	459184	12883.5	ctgf
47	D11	16	64.5364	453419	12867.1	ctgf
47	D11	17	64.8387	450417	12807.1	ctgf
47	D11	18	65.141	445872	12714.2	ctgf
47	D11	19	65.4433	442078	12608	ctgf
47	D11	20	65.7457	438071	12511.4	ctgf
47	D11	21	66.048	434047	12445.4	ctgf
47	D11	22	66.3503	430676	12421.3	ctgf
47	D11	23	66.6526	427070	12437.1	ctgf
47	D11	24	66.955	422286	12476.6	ctgf
47	D11	25	67.2573	419518	12515	ctgf
47	D11	26	67.5596	414975	12526.6	ctgf
47	D11	27	67.8619	410653	12496.7	ctgf
47	D11	28	68.1643	406652	12427.6	ctgf
47	D11	29	68.4666	402530	12337.9	ctgf
47	D11	30	68.7689	399477	12252.9	ctgf
47	D11	31	69.0712	395867	12192	ctgf
47	D11	32	69.3736	391603	12159.8	ctgf
47	D11	33	69.6759	388081	12144.9	ctgf
47	D11	34	69.9782	384311	12126.1	ctgf
47	D11	35	70.2805	380937	12083.2	ctgf
47	D11	36	70.5829	376354	12005.6	ctgf
47	D11	37	70.8852	373039	11899.4	ctgf
47	D11	38	71.1875	369138	11784.8	ctgf
47	D11	39	71.4898	365813	11692.2	ctgf
47	D11	40	71.7922	363273	11636.3	ctgf
47	D11	41	72.0945	358997	11619.3	ctgf
47	D11	42	72.3968	355171	11626.1	ctgf
47	D11	43	72.6991	352204	11632.2	ctgf
47	D11	44	73.0015	348391	11615.2	ctgf
47	D11	45	73.3038	344582	11566.9	ctgf
47	D11	46	73.6061	340587	11496.2	ctgf
47	D11	47	73.9084	338509	11425.6	ctgf
47	D11	48	74.2108	334112	11380.4	ctgf
47	D11	49	74.5131	331885	11376.8	ctgf
47	D11	50	74.8154	327614	11417.2	ctgf
47	D11	51	75.1177	324185	11491.9	ctgf
47	D11	52	75.4201	319972	11585.5	ctgf
47	D11	53	75.7224	316976	11682.7	ctgf
47	D11	54	76.0247	313083	11769.1	ctgf
47	D11	55	76.327	309385	11833.5	ctgf
47	D11	56	76.6294	304892	11859.5	ctgf
47	D11	57	76.9317	301568	11840.9	ctgf
47	D11	58	77.234	297134	11781.5	ctgf
47	D11	59	77.5363	294281	11696.6	ctgf
47	D11	60	77.8387	290848	11597	ctgf
47	D11	61	78.141	286317	11489.8	ctgf
47	D11	62	78.4433	283175	11377.5	ctgf
47	D11	63	78.7456	279602	11264.1	ctgf
47	D11	64	79.048	275813	11164.6	ctgf
47	D11	65	79.3503	272796	11110.8	ctgf
47	D11	66	79.6526	270038	11151.9	ctgf
47	D11	67	79.9549	266976	11355.1	ctgf
47	D11	68	80.2572	262664	11814.2	ctgf
47	D11	69	80.5596	260175	12700.2	ctgf
47	D11	70	80.8619	255877	14209.4	ctgf
47	D11	71	81.1642	252144	16646.5	ctgf
47	D11	72	81.4666	247570	20386.9	ctgf
47	D11	73	81.7689	242692	25798.9	ctgf
47	D11	74	82.0712	235804	33100.6	ctgf
47	D11	75	82.3735	224951	42180.3	ctgf
47	D11	76	82.6758	208158	52448.3	ctgf
47	D11	77	82.9782	182969	62807.5	ctgf
47	D11	78	83.2805	149219	71805	ctgf
47	D11	79	83.5828	112685	77955.8	ctgf
47	D11	80	83.8851	80716.3	80138.9	ctgf
47	D11	81	84.1875	56189.6	77918.7	ctgf
47	D11	82	84.4898	37185.2	71659.8	ctgf
47	D11	83	84.7921	23474.7	62400.5	ctgf
47	D11	84	85.0944	16450.8	51546.1	ctgf
47	D11	85	85.3968	11462.9	40510.5	ctgf
47	D11	86	85.6991	8029.55	30422.9	ctgf
47	D11	87	86.0014	6138.89	21973.2	ctgf
47	D11	88	86.3037	4801.52	15401.5	ctgf
47	D11	89	86.6061	3496.15	10648.5	ctgf
47	D11	90	86.9084	1922.08	7448.01	ctgf
47	D11	91	87.2107	1643.15	5294.09	ctgf
47	D11	92	87.513	2185.11	3876.63	ctgf
47	D11	93	87.8154	927.258	2960.14	ctgf
47	D11	94	88.1177	-39.0883	2376.79	ctgf
47	D11	95	88.42	-166.945	2003.66	ctgf
47	D11	96	88.7223	-1159.77	1745.93	ctgf
47	D11	97	89.0247	-1620.56	1533.23	ctgf
47	D11	98	89.327	-1691.25	1322.55	ctgf
47	D11	99	89.6293	-2275.56	1098.71	ctgf
47	D11	100	89.9316	-1984.13	868.113	ctgf
47	D11	101	90.234	-2349.49	648.328	ctgf
47	D11	102	90.5363	-2588.96	458.529	ctgf
47	D11	103	90.8386	-2414.41	313.651	ctgf
47	D11	104	91.1409	-2376.64	221.673	ctgf
47	D11	105	91.4433	-2582.89	181.693	ctgf
47	D11	106	91.7456	-2518.57	182.11	ctgf
47	D11	107	92.0479	-3387.23	200.94	ctgf
47	D11	108	92.3502	-3242.44	211.006	ctgf
47	D11	109	92.6526	-3789.12	189.797	ctgf
47	D11	110	92.9549	-3679.24	129.342	ctgf
47	D11	111	93.2572	-2843.22	39.7793	ctgf
47	D11	112	93.5595	-3677.35	-56.335	ctgf
47	D11	113	93.8619	-3311.99	-135.885	ctgf
47	D11	114	94.1642	-2994.59	-186.048	ctgf
47	D11	115	94.4665	-3675.41	-208.24	ctgf
47	D11	116	94.7688	-3574.77	-214.231	ctgf
48	D12	1	60.0015	544097	11882	ctgf
48	D12	2	60.3038	540155	12004	ctgf
48	D12	3	60.6061	536839	12130.4	ctgf
48	D12	4	60.9085	534184	12265	ctgf
48	D12	5	61.2108	530834	12415.2	ctgf
48	D12	6	61.5131	526580	12583.7	ctgf
48	D12	7	61.8154	523496	12761.9	ctgf
48	D12	8	62.1178	519118	12936.4	ctgf
48	D12	9	62.4201	515181	13082.3	ctgf
48	D12	10	62.7224	510663	13182.6	ctgf
48	D12	11	63.0247	506156	13241.1	ctgf
48	D12	12	63.3271	502169	13273.6	ctgf
48	D12	13	63.6294	498383	13297.2	ctgf
48	D12	14	63.9317	493987	13321.1	ctgf
48	D12	15	64.234	490246	13344.8	ctgf
48	D12	16	64.5364	485194	13363.2	ctgf
48	D12	17	64.8387	481129	13372	ctgf
48	D12	18	65.141	477064	13370.7	ctgf
48	D12	19	65.4433	472424	13359.7	ctgf
48	D12	20	65.7457	469205	13339.4	ctgf
48	D12	21	66.048	463934	13311.3	ctgf
48	D12	22	66.3503	459261	13281.1	ctgf
48	D12	23	66.6526	455305	13257.3	ctgf
48	D12	24	66.955	452637	13246.3	ctgf
48	D12	25	67.2573	447516	13246.5	ctgf
48	D12	26	67.5596	442193	13247.8	ctgf
48	D12	27	67.8619	439336	13235.6	ctgf
48	D12	28	68.1643	435027	13197.9	ctgf
48	D12	29	68.4666	429689	13130.6	ctgf
48	D12	30	68.7689	425961	13040.9	ctgf
48	D12	31	69.0712	422087	12946.1	ctgf
48	D12	32	69.3736	418151	12869	ctgf
48	D12	33	69.6759	413930	12829	ctgf
48	D12	34	69.9782	409744	12832.1	ctgf
48	D12	35	70.2805	407406	12865.1	ctgf
48	D12	36	70.5829	401916	12899.2	ctgf
48	D12	37	70.8852	398205	12902.5	ctgf
48	D12	38	71.1875	393091	12857.2	ctgf
48	D12	39	71.4898	389702	12772.8	ctgf
48	D12	40	71.7922	386076	12674.4	ctgf
48	D12	41	72.0945	382048	12588.6	ctgf
48	D12	42	72.3968	378428	12530.2	ctgf
48	D12	43	72.6991	375058	12492.4	ctgf
48	D12	44	73.0015	370390	12453.8	ctgf
48	D12	45	73.3038	367030	12396.2	ctgf
48	D12	46	73.6061	361658	12321.9	ctgf
48	D12	47	73.9084	359142	12259.5	ctgf
48	D12	48	74.2108	356052	12252.2	ctgf
48	D12	49	74.5131	352299	12335.1	ctgf
48	D12	50	74.8154	348308	12514.7	ctgf
48	D12	51	75.1177	344742	12760.9	ctgf
48	D12	52	75.4201	339602	13028.3	ctgf
48	D12	53	75.7224	336338	13243.3	ctgf
48	D12	54	76.0247	329706	13353.8	ctgf
48	D12	55	76.327	326214	13347.1	ctgf
48	D12	56	76.6294	321975	13246	ctgf
48	D12	57	76.9317	318341	13093.2	ctgf
48	D12	58	77.234	314173	12929.5	ctgf
48	D12	59	77.5363	309678	12779.8	ctgf
48	D12	60	77.8387	305950	12646.2	ctgf
48	D12	61	78.141	301786	12511	ctgf
48	D12	62	78.4433	297125	12364.7	ctgf
48	D12	63	78.7456	294250	12211.4	ctgf
48	D12	64	79.048	290034	12073.3	ctgf
48	D12	65	79.3503	286226	11989.1	ctgf
48	D12	66	79.6526	283572	12011.4	ctgf
48	D12	67	79.9549	279743	12208.3	ctgf
48	D12	68	80.2572	276023	12674.3	ctgf
48	D12	69	80.5596	271882	13596.5	ctgf
48	D12	70	80.8619	268587	15193.4	ctgf
48	D12	71	81.1642	263971	17773.4	ctgf
48	D12	72	81.4666	258928	21720.5	ctgf
48	D12	73	81.7689	253848	27399.2	ctgf
48	D12	74	82.0712	245821	35005.9	ctgf
48	D12	75	82.3735	234312	44385	ctgf
48	D12	76	82.6758	216914	54882.2	ctgf
48	D12	77	82.9782	189268	65327.6	ctgf
48	D12	78	83.2805	154188	74209.7	ctgf
48	D12	79	83.5828	115527	80027.9	ctgf
48	D12	80	83.8851	84624.4	81709.1	ctgf
48	D12	81	84.1875	59364.9	78927	ctgf
48	D12	82	84.4898	40791.2	72190.6	ctgf
48	D12	83	84.7921	29169.4	62674.3	ctgf
48	D12	84	85.0944	20622.2	51869.6	ctgf
48	D12	85	85.3968	15805.4	41199.3	ctgf
48	D12	86	85.6991	11789.5	31720.1	ctgf
48	D12	87	86.0014	7565.15	23985.3	ctgf
48	D12	88	86.3037	4453.86	18069.1	ctgf
48	D12	89	86.6061	202.95	13712.6	ctgf
48	D12	90	86.9084	-699.801	10650.1	ctgf
48	D12	91	87.2107	-1659.2	8376.46	ctgf
48	D12	92	87.513	-2180.56	6592.61	ctgf
48	D12	93	87.8154	-3602.52	5162.69	ctgf
48	D12	94	88.1177	-3932.07	4020.88	ctgf
48	D12	95	88.42	-5283.82	3124.89	ctgf
48	D12	96	88.7223	-4712.38	2431.6	ctgf
48	D12	97	89.0247	-5700.37	1896.29	ctgf
48	D12	98	89.327	-5971.64	1481.01	ctgf
48	D12	99	89.6293	-5865.45	1159.16	ctgf
48	D12	100	89.9316	-6005.86	912.438	ctgf
48	D12	101	90.234	-6121.51	724.883	ctgf
48	D12	102	90.5363	-7475.35	579.99	ctgf
48	D12	103	90.8386	-6349.19	463.296	ctgf
48	D12	104	91.1409	-7196.27	367.271	ctgf
48	D12	105	91.4433	-6425.31	292.952	ctgf
48	D12	106	91.7456	-6692.07	245.43	ctgf
48	D12	107	92.0479	-7816.25	226.07	ctgf
48	D12	108	92.3502	-6853.33	227.551	ctgf
48	D12	109	92.6526	-7715.62	235.35	ctgf
48	D12	110	92.9549	-7430.62	234.115	ctgf
48	D12	111	93.2572	-8184.83	214.265	ctgf
48	D12	112	93.5595	-7787.95	175.175	ctgf
48	D12	113	93.8619	-7517.66	124.084	ctgf
48	D12	114	94.1642	-8204.62	71.8936	ctgf
48	D12	115	94.4665	-7887.89	28.0117	ctgf
48	D12	116	94.7688	-7723.57	-3.3418	ctgf
55	E7	1	60.0017	399474	7862.86	actin
55	E7	2	60.3039	398442	8027.93	actin
55	E7	3	60.6062	396859	8213.11	actin
55	E7	4	60.9084	394288	8405.59	actin
55	E7	5	61.2106	392190	8592.91	actin
55	E7	6	61.5129	389425	8768.31	actin
55	E7	7	61.8151	386084	8931.08	actin
55	E7	8	62.1173	384047	9082.39	actin
55	E7	9	62.4196	381448	9220.08	actin
55	E7	10	62.7218	378350	9337.7	actin
55	E7	11	63.024	375359	9424.67	actin
55	E7	12	63.3263	372242	9476.75	actin
55	E7	13	63.6285	369348	9510.16	actin
55	E7	14	63.9307	366311	9534.18	actin
55	E7	15	64.233	363595	9557.16	actin
55	E7	16	64.5352	360191	9582.77	actin
55	E7	17	64.8375	358002	9609	actin
55	E7	18	65.1397	354189	9630.23	actin
55	E7	19	65.4419	351449	9640.29	actin
55	E7	20	65.7442	348025	9634.69	actin
55	E7	21	66.0464	345262	9610.76	actin
55	E7	22	66.3486	342543	9567.94	actin
55	E7	23	66.6509	338878	9508.73	actin
55	E7	24	66.9531	336178	9440.59	actin
55	E7	25	67.2553	332964	9370.25	actin
55	E7	26	67.5576	330390	9314.56	actin
55	E7	27	67.8598	327548	9292.91	actin
55	E7	28	68.162	324557	9307.11	actin
55	E7	29	68.4643	322097	9347.11	actin
55	E7	30	68.7665	318711	9394.87	actin
55	E7	31	69.0687	315508	9427.78	actin
55	E7	32	69.371	312967	9438.91	actin
55	E7	33	69.6732	309676	9424.91	actin
55	E7	34	69.9754	307288	9382.41	actin
55	E7	35	70.2777	303724	9313.18	actin
55	E7	36	70.5799	301189	9233.3	actin
55	E7	37	70.8821	298340	9159.41	actin
55	E7	38	71.1844	295594	9107.69	actin
55	E7	39	71.4866	292858	9086.81	actin
55	E7	40	71.7888	291051	9092.53	actin
55	E7	41	72.0911	287460	9109.54	actin
55	E7	42	72.3933	284364	9120.14	actin
55	E7	43	72.6956	281548	9115.9	actin
55	E7	44	72.9978	278898	9103.46	actin
55	E7	45	73.3	276797	9101.81	actin
55	E7	46	73.6023	273608	9133.21	actin
55	E7	47	73.9045	271264	9214.55	actin
55	E7	48	74.2067	268469	9352.54	actin
55	E7	49	74.509	265414	9520.18	actin
55	E7	50	74.8112	262571	9709.61	actin
55	E7	51	75.1134	259931	9907.55	actin
55	E7	52	75.4157	256076	10085.6	actin
55	E7	53	75.7179	252679	10214.8	actin
55	E7	54	76.0201	249002	10274.6	actin
55	E7	55	76.3224	245167	10259	actin
55	E7	56	76.6246	242703	10177.9	actin
55	E7	57	76.9268	238998	10052	actin
55	E7	58	77.2291	236071	9905.35	actin
55	E7	59	77.5313	233002	9758.82	actin
55	E7	60	77.8335	229815	9627.86	actin
55	E7	61	78.1358	227051	9521.92	actin
55	E7	62	78.438	224453	9444.71	actin
55	E7	63	78.7402	221321	9391.44	actin
55	E7	64	79.0425	218408	9353.35	actin
55	E7	65	79.3447	215358	9327.31	actin
55	E7	66	79.6469	212793	9305.61	actin
55	E7	67	79.9492	209883	9288.04	actin
55	E7	68	80.2514	207213	9283.06	actin
55	E7	69	80.5536	204395	9305.76	actin
55	E7	70	80.8559	201909	9374.16	actin
55	E7	71	81.1581	198863	9489.69	actin
55	E7	72	81.4604	196102	9667.24	actin
55	E7	73	81.7626	193044	9925.53	actin
55	E7	74	82.0648	190222	10279.1	actin
55	E7	75	82.3671	186388	10744.1	actin
55	E7	76	82.6693	183379	11337	actin
55	E7	77	82.9715	179452	12072.4	actin
55	E7	78	83.2738	175548	12962.7	actin
55	E7	79	83.576	170146	14022.7	actin
55	E7	80	83.8782	164619	15283.7	actin
55	E7	81	84.1805	159586	16812.7	actin
55	E7	82	84.4827	153276	18728.9	actin
55	E7	83	84.7849	147311	21201.1	actin
55	E7	84	85.0872	139185	24405.5	actin
55	E7	85	85.3894	129672	28432	actin
55	E7	86	85.6916	115815	33150.9	actin
55	E7	87	85.9939	95668.5	38101	actin
55	E7	88	86.2961	69563.9	42486	actin
55	E7	89	86.5983	42908.5	45341.4	actin
55	E7	90	86.9006	21115.3	45842.5	actin
55	E7	91	87.2028	7802.26	43623.5	actin
55	E7	92	87.5051	1586.59	38941.4	actin
55	E7	93	87.8073	-1387.31	32594.6	actin
55	E7	94	88.1095	-3622.12	25641.5	actin
55	E7	95	88.4118	-4413.93	19062.2	actin
55	E7	96	88.714	-5447.36	13518.7	actin
55	E7	97	89.0162	-5247.23	9257.73	actin
55	E7	98	89.3185	-5675.32	5694.76	actin
55	E7	99	89.6207	-5750.93	3368.52	actin
55	E7	100	89.9229	-5762.45	1945.88	actin
55	E7	101	90.2252	-5650.19	1128.59	actin
55	E7	102	90.5274	-6140.19	690.55	actin
55	E7	103	90.8296	-5604.73	476.467	actin
55	E7	104	91.1319	-6249.32	385.087	actin
55	E7	105	91.4341	-6458.76	352.019	actin
55	E7	106	91.7363	-6447.75	338.008	actin
55	E7	107	92.0386	-6514.16	322.021	actin
55	E7	108	92.3408	-6564.65	296.237	actin
55	E7	109	92.643	-6745.07	261.211	actin
55	E7	110	92.9453	-6892.45	221.517	actin
55	E7	111	93.2475	-6758.92	182.847	actin
55	E7	112	93.5497	-6768.33	150.428	actin
55	E7	113	93.852	-6713.49	127.732	actin
55	E7	114	94.1542	-7025.42	115.152	actin
55	E7	115	94.4564	-6929.34	109.503	actin
55	E7	116	94.7587	-7075.82	105.366	actin
56	E8	1	60.0017	407660	8225.04	actin
56	E8	2	60.3039	405396	8395.47	actin
56	E8	3	60.6062	403875	8584.26	actin
56	E8	4	60.9084	401786	8782.24	actin
56	E8	5	61.2106	399361	8978.81	actin
56	E8	6	61.5129	396076	9165.42	actin
56	E8	7	61.8151	393425	9336.72	actin
56	E8	8	62.1173	390963	9490.42	actin
56	E8	9	62.4196	387445	9626.3	actin
56	E8	10	62.7218	384945	9745.15	actin
56	E8	11	63.024	381259	9837.37	actin
56	E8	12	63.3263	378812	9915.42	actin
56	E8	13	63.6285	375458	9979.46	actin
56	E8	14	63.9307	372360	10027.5	actin
56	E8	15	64.233	369124	10057.7	actin
56	E8	16	64.5352	365769	10069.3	actin
56	E8	17	64.8375	362740	10063.3	actin
56	E8	18	65.1397	359497	10042.5	actin
56	E8	19	65.4419	356483	10010	actin
56	E8	20	65.7442	352847	9969.13	actin
56	E8	21	66.0464	349986	9923.66	actin
56	E8	22	66.3486	347057	9877.22	actin
56	E8	23	66.6509	343508	9833.43	actin
56	E8	24	66.9531	341035	9796.17	actin
56	E8	25	67.2553	337408	9769.25	actin
56	E8	26	67.5576	334546	9755.23	actin
56	E8	27	67.8598	331375	9753.62	actin
56	E8	28	68.162	328963	9758.89	actin
56	E8	29	68.4643	325171	9762.39	actin
56	E8	30	68.7665	322078	9755.36	actin
56	E8	31	69.0687	318994	9730.83	actin
56	E8	32	69.371	316277	9690.9	actin
56	E8	33	69.6732	313023	9642.07	actin
56	E8	34	69.9754	310233	9591.52	actin
56	E8	35	70.2777	307273	9544.39	actin
56	E8	36	70.5799	304229	9502.89	actin
56	E8	37	70.8821	301396	9466.21	actin
56	E8	38	71.1844	298686	9431.49	actin
56	E8	39	71.4866	295520	9395.1	actin
56	E8	40	71.7888	292840	9355.13	actin
56	E8	41	72.0911	289762	9313.44	actin
56	E8	42	72.3933	286727	9277.47	actin
56	E8	43	72.6956	284550	9258.05	actin
56	E8	44	72.9978	281605	9266.31	actin
56	E8	45	73.3	278635	9309.71	actin
56	E8	46	73.6023	276079	9390.88	actin
56	E8	47	73.9045	273566	9509.1	actin
56	E8	48	74.2067	270027	9662.94	actin
56	E8	49	74.509	267363	9839.94	actin
56	E8	50	74.8112	264021	10033.4	actin
56	E8	51	75.1134	261615	10242.7	actin
56	E8	52	75.4157	257952	10445.7	actin
56	E8	53	75.7179	253853	10612.4	actin
56	E8	54	76.0201	250800	10713.7	actin
56	E8	55	76.3224	246444	10733.7	actin
56	E8	56	76.6246	242714	10676.4	actin
56	E8	57	76.9268	240090	10562.8	actin
56	E8	58	77.2291	237232	10421.2	actin
56	E8	59	77.5313	233019	10274.6	actin
56	E8	60	77.8335	230065	10135.2	actin
56	E8	61	78.1358	227480	10005.1	actin
56	E8	62	78.438	223800	9882.62	actin
56	E8	63	78.7402	220705	9768.23	actin
56	E8	64	79.0425	217893	9656.53	actin
56	E8	65	79.3447	215577	9569.37	actin
56	E8	66	79.6469	212155	9519.69	actin
56	E8	67	79.9492	209669	9514.35	actin
56	E8	68	80.2514	206595	9554.49	actin
56	E8	69	80.5536	204100	9637.95	actin
56	E8	70	80.8559	200702	9762.99	actin
56	E8	71	81.1581	197795	9918.44	actin
56	E8	72	81.4604	194350	10131.3	actin
56	E8	73	81.7626	192264	10421.3	actin
56	E8	74	82.0648	188903	10809.4	actin
56	E8	75	82.3671	184538	11313.2	actin
56	E8	76	82.6693	181484	11945.8	actin
56	E8	77	82.9715	177073	12719.3	actin
56	E8	78	83.2738	173149	13650.9	actin
56	E8	79	83.576	167920	14771.3	actin
56	E8	80	83.8782	162479	16136.3	actin
56	E8	81	84.1805	156552	17840	actin
56	E8	82	84.4827	151321	20023.9	actin
56	E8	83	84.7849	144144	22866.6	actin
56	E8	84	85.0872	136092	26533	actin
56	E8	85	85.3894	125850	31071.3	actin
56	E8	86	85.6916	110351	36276.6	actin
56	E8	87	85.9939	88931.3	41586.2	actin
56	E8	88	86.2961	61575.2	46101.8	actin
56	E8	89	86.5983	35076.6	48794.4	actin
56	E8	90	86.9006	13741.7	48846.3	actin
56	E8	91	87.2028	1946.55	45980	actin
56	E8	92	87.5051	-3671.59	40594.8	actin
56	E8	93	87.8073	-5686.95	33632.8	actin
56	E8	94	88.1095	-8265.5	26242.5	actin
56	E8	95	88.4118	-10091	19415.8	actin
56	E8	96	88.714	-11712.5	13761	actin
56	E8	97	89.0162	-11802.5	9435.21	actin
56	E8	98	89.3185	-11854.2	6009.97	actin
56	E8	99	89.6207	-11795.1	3725.74	actin
56	E8	100	89.9229	-11961	2276.57	actin
56	E8	101	90.2252	-12296.8	1400.49	actin
56	E8	102	90.5274	-12687.5	896.524	actin
56	E8	103	90.8296	-12789.5	620.448	actin
56	E8	104	91.1319	-12617.4	475.87	actin
56	E8	105	91.4341	-12676.9	403.595	actin
56	E8	106	91.7363	-13082.8	368.66	actin
56	E8	107	92.0386	-13355.9	348.002	actin
56	E8	108	92.3408	-13497.9	323.512	actin
56	E8	109	92.643	-13565.6	282.058	actin
56	E8	110	92.9453	-13761.8	219.053	actin
56	E8	111	93.2475	-13615.1	140.271	actin
56	E8	112	93.5497	-13470.2	58.9092	actin
56	E8	113	93.852	-13546.2	-11.0215	actin
56	E8	114	94.1542	-13522.8	-61.3174	actin
56	E8	115	94.4564	-13598.7	-92.6143	actin
56	E8	116	94.7587	-13767.9	-112.634	actin
57	E9	1	60.0012	367940	7012.66	actin
57	E9	2	60.3036	366871	7186.15	actin
57	E9	3	60.606	365697	7375.85	actin
57	E9	4	60.9084	363434	7570.3	actin
57	E9	5	61.2108	360422	7760.73	actin
57	E9	6	61.5132	358862	7943.04	actin
57	E9	7	61.8156	355935	8116.39	actin
57	E9	8	62.118	353678	8278.84	actin
57	E9	9	62.4204	351331	8426.13	actin
57	E9	10	62.7229	348240	8553.2	actin
57	E9	11	63.0253	345417	8652.9	actin
57	E9	12	63.3277	343017	8730.46	actin
57	E9	13	63.6301	339681	8790.29	actin
57	E9	14	63.9325	337609	8832.46	actin
57	E9	15	64.2349	334312	8853.77	actin
57	E9	16	64.5373	331538	8850.7	actin
57	E9	17	64.8397	328658	8823.53	actin
57	E9	18	65.1421	325437	8779.08	actin
57	E9	19	65.4445	322980	8728.9	actin
57	E9	20	65.7469	319758	8684.26	actin
57	E9	21	66.0493	318023	8651.19	actin
57	E9	22	66.3517	314639	8629.24	actin
57	E9	23	66.6541	311808	8614.94	actin
57	E9	24	66.9565	309109	8605.93	actin
57	E9	25	67.2589	306409	8602.85	actin
57	E9	26	67.5614	303820	8607.37	actin
57	E9	27	67.8638	300983	8618.15	actin
57	E9	28	68.1662	298229	8628.82	actin
57	E9	29	68.4686	295296	8629.53	actin
57	E9	30	68.771	292859	8611.7	actin
57	E9	31	69.0734	289441	8571.84	actin
57	E9	32	69.3758	286989	8512.91	actin
57	E9	33	69.6782	284095	8447.07	actin
57	E9	34	69.9806	282573	8383.5	actin
57	E9	35	70.283	279261	8325.64	actin
57	E9	36	70.5854	276204	8271.6	actin
57	E9	37	70.8878	274256	8218.06	actin
57	E9	38	71.1902	271635	8164.59	actin
57	E9	39	71.4926	268651	8114.54	actin
57	E9	40	71.795	266806	8072.69	actin
57	E9	41	72.0974	263984	8042.76	actin
57	E9	42	72.3998	261636	8026.11	actin
57	E9	43	72.7023	258863	8023.34	actin
57	E9	44	73.0047	256859	8036.87	actin
57	E9	45	73.3071	253905	8073.01	actin
57	E9	46	73.6095	252100	8141.85	actin
57	E9	47	73.9119	249011	8254.56	actin
57	E9	48	74.2143	246844	8417.54	actin
57	E9	49	74.5167	244630	8623.26	actin
57	E9	50	74.8191	241310	8841.31	actin
57	E9	51	75.1215	238972	9052.13	actin
57	E9	52	75.4239	235222	9221.22	actin
57	E9	53	75.7263	231445	9322.56	actin
57	E9	54	76.0287	228926	9347.65	actin
57	E9	55	76.3311	225844	9305.98	actin
57	E9	56	76.6335	222906	9217.66	actin
57	E9	57	76.9359	220051	9103.05	actin
57	E9	58	77.2383	217000	8976.02	actin
57	E9	59	77.5408	214019	8843.41	actin
57	E9	60	77.8432	211434	8708.95	actin
57	E9	61	78.1456	208854	8577.31	actin
57	E9	62	78.448	205785	8449.86	actin
57	E9	63	78.7504	203606	8348.05	actin
57	E9	64	79.0528	200927	8283.17	actin
57	E9	65	79.3552	198643	8260.5	actin
57	E9	66	79.6576	196281	8276.32	actin
57	E9	67	79.96	193060	8319.82	actin
57	E9	68	80.2624	190796	8380.01	actin
57	E9	69	80.5648	187666	8454.99	actin
57	E9	70	80.8672	185667	8557.78	actin
57	E9	71	81.1696	183269	8705.66	actin
57	E9	72	81.472	180316	8930.99	actin
57	E9	73	81.7744	177664	9261.2	actin
57	E9	74	82.0768	174587	9714.25	actin
57	E9	75	82.3792	171249	10302.6	actin
57	E9	76	82.6817	167608	11039	actin
57	E9	77	82.9841	164128	11942.4	actin
57	E9	78	83.2865	159855	13043.2	actin
57	E9	79	83.5889	154720	14388.3	actin
57	E9	80	83.8913	149251	16047.5	actin
57	E9	81	84.1937	143531	18116.6	actin
57	E9	82	84.4961	137469	20710.6	actin
57	E9	83	84.7985	130283	23933.9	actin
57	E9	84	85.1009	121313	27820.8	actin
57	E9	85	85.4033	108121	32250	actin
57	E9	86	85.7057	89078.9	36860.9	actin
57	E9	87	86.0081	65224.5	41024.1	actin
57	E9	88	86.3105	39592.8	43928.7	actin
57	E9	89	86.6129	20704.4	44800	actin
57	E9	90	86.9153	8885.61	43180.4	actin
57	E9	91	87.2177	3320.91	39136	actin
57	E9	92	87.5202	-719.726	33268.8	actin
57	E9	93	87.8226	-2463.86	26518.7	actin
57	E9	94	88.125	-3686.2	19858.2	actin
57	E9	95	88.4274	-3342.78	14028.3	actin
57	E9	96	88.7298	-3830.59	9415.26	actin
57	E9	97	89.0322	-4126.94	5890.25	actin
57	E9	98	89.3346	-4093.49	3491.92	actin
57	E9	99	89.637	-4164.9	2001.85	actin
57	E9	100	89.9394	-3922.8	1139.46	actin
57	E9	101	90.2418	-4643.58	674.882	actin
57	E9	102	90.5442	-4354.27	442.845	actin
57	E9	103	90.8466	-4554.91	335.226	actin
57	E9	104	91.149	-4551.73	286.263	actin
57	E9	105	91.4514	-4992.44	258.407	actin
57	E9	106	91.7538	-4547.28	231.816	actin
57	E9	107	92.0562	-5343.78	197.99	actin
57	E9	108	92.3586	-4881.63	156.549	actin
57	E9	109	92.6611	-4711.24	113.244	actin
57	E9	110	92.9635	-5108.07	77.2188	actin
57	E9	111	93.2659	-4892.07	56.874	actin
57	E9	112	93.5683	-4721.47	55.5957	actin
57	E9	113	93.8707	-5310.39	69.6104	actin
57	E9	114	94.1731	-5202.75	89.4189	actin
57	E9	115	94.4755	-5421.39	104.221	actin
57	E9	116	94.7779	-5205.52	106.8	actin
58	E10	1	60.0012	366620	7387.16	actin
58	E10	2	60.3036	364924	7515.98	actin
58	E10	3	60.606	363702	7670.21	actin
58	E10	4	60.9084	361446	7844.94	actin
58	E10	5	61.2108	358970	8031.21	actin
58	E10	6	61.5132	356926	8216.66	actin
58	E10	7	61.8156	354443	8387.91	actin
58	E10	8	62.118	351296	8533.17	actin
58	E10	9	62.4204	348962	8647.04	actin
58	E10	10	62.7229	346033	8727.93	actin
58	E10	11	63.0253	343061	8778.82	actin
58	E10	12	63.3277	340491	8808.04	actin
58	E10	13	63.6301	337987	8824.24	actin
58	E10	14	63.9325	334795	8834.61	actin
58	E10	15	64.2349	331793	8842.64	actin
58	E10	16	64.5373	329206	8847.01	actin
58	E10	17	64.8397	326964	8841.76	actin
58	E10	18	65.1421	323518	8819.76	actin
58	E10	19	65.4445	320606	8778.63	actin
58	E10	20	65.7469	317578	8724.97	actin
58	E10	21	66.0493	315078	8673.27	actin
58	E10	22	66.3517	312466	8639.18	actin
58	E10	23	66.6541	309691	8631.76	actin
58	E10	24	66.9565	307560	8649.04	actin
58	E10	25	67.2589	303820	8679.08	actin
58	E10	26	67.5614	301682	8704.53	actin
58	E10	27	67.8638	298674	8708.73	actin
58	E10	28	68.1662	295843	8681.09	actin
58	E10	29	68.4686	292640	8620.71	actin
58	E10	30	68.771	290277	8539.77	actin
58	E10	31	69.0734	287014	8455.17	actin
58	E10	32	69.3758	285229	8382.45	actin
58	E10	33	69.6782	282426	8328.98	actin
58	E10	34	69.9806	280115	8289.2	actin
58	E10	35	70.283	277352	8248.98	actin
58	E10	36	70.5854	273934	8195.72	actin
58	E10	37	70.8878	272147	8127.75	actin
58	E10	38	71.1902	269346	8056.54	actin
58	E10	39	71.4926	266837	8000.45	actin
58	E10	40	71.795	265373	7974.67	actin
58	E10	41	72.0974	261885	7984.33	actin
58	E10	42	72.3998	259961	8024.24	actin
58	E10	43	72.7023	257297	8084.53	actin
58	E10	44	73.0047	254800	8157.47	actin
58	E10	45	73.3071	251813	8241.27	actin
58	E10	46	73.6095	250098	8338.87	actin
58	E10	47	73.9119	247464	8453.89	actin
58	E10	48	74.2143	244530	8586.48	actin
58	E10	49	74.5167	241783	8736.6	actin
58	E10	50	74.8191	239192	8889.96	actin
58	E10	51	75.1215	236341	9031.96	actin
58	E10	52	75.4239	233003	9144.72	actin
58	E10	53	75.7263	230347	9209.77	actin
58	E10	54	76.0287	227071	9213.27	actin
58	E10	55	76.3311	223448	9152.57	actin
58	E10	56	76.6335	220867	9039.79	actin
58	E10	57	76.9359	218325	8898.48	actin
58	E10	58	77.2383	215604	8754.17	actin
58	E10	59	77.5408	212966	8623.79	actin
58	E10	60	77.8432	210245	8514.34	actin
58	E10	61	78.1456	206868	8419.57	actin
58	E10	62	78.448	204551	8334.95	actin
58	E10	63	78.7504	202468	8263.33	actin
58	E10	64	79.0528	199524	8212.87	actin
58	E10	65	79.3552	197516	8190.89	actin
58	E10	66	79.6576	194464	8199.03	actin
58	E10	67	79.96	192069	8233.74	actin
58	E10	68	80.2624	189442	8292.11	actin
58	E10	69	80.5648	187039	8378.48	actin
58	E10	70	80.8672	184547	8507.29	actin
58	E10	71	81.1696	181944	8705.11	actin
58	E10	72	81.472	179087	9000.69	actin
58	E10	73	81.7744	176627	9416.33	actin
58	E10	74	82.0768	173299	9971.79	actin
58	E10	75	82.3792	170349	10679.8	actin
58	E10	76	82.6817	166175	11547.9	actin
58	E10	77	82.9841	162697	12584.7	actin
58	E10	78	83.2865	158029	13810.3	actin
58	E10	79	83.5889	152606	15270	actin
58	E10	80	83.8913	147311	17045.3	actin
58	E10	81	84.1937	141735	19252.3	actin
58	E10	82	84.4961	136207	22018.1	actin
58	E10	83	84.7985	129047	25430.9	actin
58	E10	84	85.1009	119293	29471.8	actin
58	E10	85	85.4033	105687	33943.1	actin
58	E10	86	85.7057	86711.5	38422.1	actin
58	E10	87	86.0081	64115.4	42280.9	actin
58	E10	88	86.3105	41788.3	44799.6	actin
58	E10	89	86.6129	27674.3	45364.4	actin
58	E10	90	86.9153	17834.3	43677.5	actin
58	E10	91	87.2177	9524.88	39876.5	actin
58	E10	92	87.5202	3064.16	34494.5	actin
58	E10	93	87.8226	-361.174	28285.7	actin
58	E10	94	88.125	-2107.09	22007.8	actin
58	E10	95	88.4274	-2931.79	16259.2	actin
58	E10	96	88.7298	-2871.89	11409.4	actin
58	E10	97	89.0322	-3247.79	7640.31	actin
58	E10	98	89.3346	-3301.97	4955	actin
58	E10	99	89.637	-4064.96	3127.07	actin
58	E10	100	89.9394	-3350.56	1968.38	actin
58	E10	101	90.2418	-4185.92	1283.08	actin
58	E10	102	90.5442	-4551.41	901.799	actin
58	E10	103	90.8466	-4032.91	698.799	actin
58	E10	104	91.149	-4437.72	592.83	actin
58	E10	105	91.4514	-4824.31	536.723	actin
58	E10	106	91.7538	-4307.07	503.114	actin
58	E10	107	92.0562	-5273.96	473.188	actin
58	E10	108	92.3586	-5463.61	432.395	actin
58	E10	109	92.6611	-5039.81	372.455	actin
58	E10	110	92.9635	-5214.32	295.001	actin
58	E10	111	93.2659	-5143.88	211.538	actin
58	E10	112	93.5683	-4917.78	137.751	actin
58	E10	113	93.8707	-5106.16	85.0303	actin
58	E10	114	94.1731	-5109.27	54.5469	actin
58	E10	115	94.4755	-5565.74	37.501	actin
58	E10	116	94.7779	-5292	20.8516	actin
59	E11	1	60.0015	366776	7766.49	actin
59	E11	2	60.3038	365568	7850.43	actin
59	E11	3	60.6061	364006	7944.96	actin
59	E11	4	60.9085	361154	8049.73	actin
59	E11	5	61.2108	358511	8167.22	actin
59	E11	6	61.5131	356539	8297.92	actin
59	E11	7	61.8154	354393	8434.18	actin
59	E11	8	62.1178	351620	8553.59	actin
59	E11	9	62.4201	348974	8635.58	actin
59	E11	10	62.7224	345657	8683.98	actin
59	E11	11	63.0247	342456	8701.29	actin
59	E11	12	63.3271	340343	8696.98	actin
59	E11	13	63.6294	338204	8680.22	actin
59	E11	14	63.9317	334892	8655.79	actin
59	E11	15	64.234	331801	8625.97	actin
59	E11	16	64.5364	329173	8595.94	actin
59	E11	17	64.8387	326835	8576.02	actin
59	E11	18	65.141	323779	8579.22	actin
59	E11	19	65.4433	321200	8614.79	actin
59	E11	20	65.7457	318597	8682.3	actin
59	E11	21	66.048	316498	8770.17	actin
59	E11	22	66.3503	312539	8859.21	actin
59	E11	23	66.6526	310283	8929.97	actin
59	E11	24	66.955	307145	8970.05	actin
59	E11	25	67.2573	304315	8977.15	actin
59	E11	26	67.5596	300768	8957.41	actin
59	E11	27	67.8619	298609	8918.95	actin
59	E11	28	68.1643	296016	8867.15	actin
59	E11	29	68.4666	292777	8803.3	actin
59	E11	30	68.7689	289623	8729.24	actin
59	E11	31	69.0712	286739	8651.39	actin
59	E11	32	69.3736	284610	8580.79	actin
59	E11	33	69.6759	282226	8527.55	actin
59	E11	34	69.9782	279545	8490.39	actin
59	E11	35	70.2805	276515	8468.48	actin
59	E11	36	70.5829	274269	8450.53	actin
59	E11	37	70.8852	271027	8426.12	actin
59	E11	38	71.1875	268717	8391.42	actin
59	E11	39	71.4898	266413	8348.29	actin
59	E11	40	71.7922	263760	8300.83	actin
59	E11	41	72.0945	260883	8253.62	actin
59	E11	42	72.3968	258360	8212.23	actin
59	E11	43	72.6991	256097	8184.33	actin
59	E11	44	73.0015	253291	8178.06	actin
59	E11	45	73.3038	251759	8198.31	actin
59	E11	46	73.6061	248544	8243.81	actin
59	E11	47	73.9084	246080	8308.15	actin
59	E11	48	74.2108	243617	8382.94	actin
59	E11	49	74.5131	240826	8461.42	actin
59	E11	50	74.8154	238368	8535.92	actin
59	E11	51	75.1177	235719	8596.7	actin
59	E11	52	75.4201	232738	8646.37	actin
59	E11	53	75.7224	229586	8678.13	actin
59	E11	54	76.0247	227381	8686.23	actin
59	E11	55	76.327	223825	8667.88	actin
59	E11	56	76.6294	221672	8623.68	actin
59	E11	57	76.9317	218472	8556.58	actin
59	E11	58	77.234	215876	8462.46	actin
59	E11	59	77.5363	213521	8345.51	actin
59	E11	60	77.8387	210274	8219.45	actin
59	E11	61	78.141	208152	8095.67	actin
59	E11	62	78.4433	205245	7990.05	actin
59	E11	63	78.7456	203501	7919.82	actin
59	E11	64	79.048	200739	7897.01	actin
59	E11	65	79.3503	198778	7922.45	actin
59	E11	66	79.6526	195923	7984.09	actin
59	E11	67	79.9549	192891	8063.16	actin
59	E11	68	80.2572	190766	8144.52	actin
59	E11	69	80.5596	188519	8226.41	actin
59	E11	70	80.8619	185466	8324.07	actin
59	E11	71	81.1642	183149	8466.06	actin
59	E11	72	81.4666	181127	8662.1	actin
59	E11	73	81.7689	178121	8942.65	actin
59	E11	74	82.0712	175360	9333.32	actin
59	E11	75	82.3735	171834	9844.5	actin
59	E11	76	82.6758	169102	10482.3	actin
59	E11	77	82.9782	165113	11253.7	actin
59	E11	78	83.2805	161023	12172.1	actin
59	E11	79	83.5828	156643	13265.3	actin
59	E11	80	83.8851	151100	14585.8	actin
59	E11	81	84.1875	146001	16222	actin
59	E11	82	84.4898	140588	18302.8	actin
59	E11	83	84.7921	134305	20983.6	actin
59	E11	84	85.0944	126623	24397.7	actin
59	E11	85	85.3968	115470	28566.1	actin
59	E11	86	85.6991	100264	33281.2	actin
59	E11	87	86.0014	78392.7	38019.5	actin
59	E11	88	86.3037	50540.2	41966.2	actin
59	E11	89	86.6061	27242.5	44200	actin
59	E11	90	86.9084	9857.54	44002.5	actin
59	E11	91	87.2107	1294.57	41152.4	actin
59	E11	92	87.513	-2305.72	36044.5	actin
59	E11	93	87.8154	-4771.36	29560.2	actin
59	E11	94	88.1177	-5996.52	22758.3	actin
59	E11	95	88.42	-6984.45	16544.7	actin
59	E11	96	88.7223	-7345.35	11468.7	actin
59	E11	97	89.0247	-7809.87	7556.77	actin
59	E11	98	89.327	-7677.34	4534.32	actin
59	E11	99	89.6293	-7673.62	2597.63	actin
59	E11	100	89.9316	-7778.15	1427.17	actin
59	E11	101	90.234	-8207.49	755.625	actin
[truncated: 1,523 more rows]

## Sheet: Melt Curve Result
Block Type	96-Well 0.2-mL Block
Calibration Background is expired	No
Calibration Background performed on	09-11-2020
Calibration Pure Dye ABY is expired	No
Calibration Pure Dye ABY performed on	09-11-2020
Calibration Pure Dye FAM is expired	No
Calibration Pure Dye FAM performed on	09-11-2020
Calibration Pure Dye JUN is expired	No
Calibration Pure Dye JUN performed on	09-11-2020
Calibration Pure Dye NED is expired	No
Calibration Pure Dye NED performed on	09-11-2020
Calibration Pure Dye ROX is expired	No
Calibration Pure Dye ROX performed on	09-11-2020
Calibration Pure Dye SYBR is expired	No
Calibration Pure Dye SYBR performed on	09-11-2020
Calibration Pure Dye TAMRA is expired	No
Calibration Pure Dye TAMRA performed on	09-11-2020
Calibration Pure Dye VIC is expired	No
Calibration Pure Dye VIC performed on	09-11-2020
Calibration ROI is expired	No
Calibration ROI performed on	09-11-2020
Calibration Uniformity is expired	No
Calibration Uniformity performed on	09-11-2020
Chemistry	SYBR_GREEN
Date Created	2021-10-22 09:44:07 AM CST
Experiment Barcode
Experiment Comment
Experiment File Name	C:\Users\Leya-zha\Desktop\A 文章 ADAMTS8在心脏纤维化中的作用\Figure6 ADAMTS8通过MAPK通路和PI3K-AKT通路\转病毒后NOX4 2020-10-01_ZYF.eds
Experiment Name	2020-10-01_ZYF
Experiment Run End Time	2020-10-01 18:41:23 PM CST
Experiment Type	Comparative Cт (ΔΔCт)
Instrument Name	272322851
Instrument Serial Number	272322851
Instrument Type	QuantStudio™ 3 System
Passive Reference	ROX
Post-read Stage/Step
Pre-read Stage/Step
Quantification Cycle Method	Ct
Signal Smoothing On	true
Stage where Melt Analysis is performed	Stage3
Stage/ Cycle where Ct Analysis is performed	Stage2, Step2
User Name
Well	Well Position	Sample	Target Name	Tm	Melt Peak Height
31	C7	AD-v	collage3	85.6916	91391.3
32	C8	AD-v	collage3	85.6916	92173.5
33	C9	AD-v	collage3	85.4033	85007.1
34	C10	Ad-ADAMTS8	collage3	85.4033	85009.7
35	C11	Ad-ADAMTS8	collage3	85.3968	90343.4
36	C12	Ad-ADAMTS8	collage3	85.5479	91783.8
43	D7	AD-v	ctgf	84.0294	78281
44	D8	AD-v	ctgf	84.0294	64824.5
45	D9	AD-v	ctgf	83.8913	81121.3
46	D10	Ad-ADAMTS8	ctgf	83.7401	79082.1
47	D11	Ad-ADAMTS8	ctgf	83.8851	80138.9
48	D12	Ad-ADAMTS8	ctgf	83.8851	81709.1
55	E7	AD-v	actin	86.7495	45922.9
56	E8	AD-v	actin	86.7495	49183.3
57	E9	AD-v	actin	86.6129	44800
58	E10	Ad-ADAMTS8	actin	86.6129	45364.4
59	E11	Ad-ADAMTS8	actin	86.7572	44433.2
60	E12	Ad-ADAMTS8	actin	86.7572	51995.6
67	F7	AD-v	adam8	85.3894	62215.3
68	F8	AD-v	adam8	85.2383	49979.8
69	F9	AD-v	adam8	85.1009	56116.8
70	F10	Ad-ADAMTS8	adam8	85.2521	63825.3
71	F11	Ad-ADAMTS8	adam8	85.5479	65778.7
72	F12	Ad-ADAMTS8	adam8	85.3968	70284.4
79	G7	AD-v	nox4	81.9137	98603.2
80	G8	AD-v	nox4	81.9137	113375
81	G9	AD-v	nox4	81.6232	91537.4
82	G10	Ad-ADAMTS8	nox4	81.6232	94398.1
83	G11	Ad-ADAMTS8	nox4	81.92	106402
84	G12	Ad-ADAMTS8	nox4	81.92	108847
